# Supplementary material for: Coordination between ECM and cell-cell adhesion regulates the development of islet aggregation, architecture, and functional maturation
Source: eLife. 2023 Aug 23;12:e90006. doi: 10.7554/eLife.90006 (PMC10482429; doi:10.7554/eLife.90006)
Supplement: Figure 1—figure supplement 1—source data 1. [file elife-90006-fig1-figsupp1-data1.xlsx]

## Sheet: Suppl 1-1D
Glucagon area/Pancreas Area
Control (n= 4)	Summary:								Mutant (n= 4)	Summary:
	% Gcg Area	T1	T2	T3	T4	average	SEM			% Gcg Area	T1	T2	T3	T4	average	SEM
	gcg_sum	1429974	598851	1151540	331559					gcg_sum	2139272	477176	585237	657862
	Islet Area_sum	4448240	3589675	4588664	840708					Islet Area_sum	7448631	2362167	3052927	1891627
	Gcg/Islet Area %	32.147	16.6826	25.0953	39.4381	27.072	4.86555			Gcg/Islet Area %	28.7203	20.2008	19.1697	34.7776	25.7171	3.70146
	Islet Area (pix^2)				Gcg Area (pix^2)					Islet Area (pix^2)				Gcg Area (pix^2)
	T1	T2	T3	T4	T1	T2	T3	T4		T1	T2	T3	T4	T1	T2	T3	T4
	121816	34983	175790	11191	645	332	936	2309		102244	17811	16833	14861	6699	695	2248	11069
	43510	101786	33329	2842	7744	347	328	2110		74943	20847	13714	119614	13681	598	1490	93156
	39851	83217	8838	76383	920	3043	1109	764		94960	127973	158713	14161	2920	2403	439	12661
	191688	6112	25114	111051	347	267	1264	1120		6443	5588	56640	36201	1034	1094	603	1178
	1813	55769	80125	41271	1836	2969	1094	1930		117952	79967	51645	122439	4270	909	5419	490
	4456	316381	178164	39630	9060	153	687	1238		3588	26173	10291	111442	577	4024	632	3110
	10595	46841	17830	9926	7106	432	303	815		34272	87711	28889	234049	1035	314	345	587
	117947	308977	532019	12317	399	453	627	8075		21804	11110	55161	41255	636	301	453	1362
	55220	9077	52138	5523	6429	481	680	9762		18960	8605	12352	39513	747	384	1662	668
	12540	5843	2709	4647	671	154	589	58723		20902	52175	44782	4388	3427	422	1133	1214
	99568	72241	7206	14793	1053	926	347	1607		9739	90531	13403	2783	583	353	4345	48835
	24171	45060	4935	34416	14478	376	554	1166		8086	171809	14886	64400	689	637	331	357
	21488	34875	14420	11074	352	306	828	1243		4440	96503	10907	29532	1113	537	412	2332
	46976	20404	8736	12637	3345	320	1358	2074		33019	54605	3260	375613	2206	457	1294	1102
	22935	66746	15332	42847	1107	12585	416	10822		36315	42288	65635	83542	835	710	8304	1105
	5698	31974	8699	12633	528	252	420	2895		4106	33045	48361	15203	5695	775	521	798
	518	121174	13830	42852	19591	412	489	1671		42926	11737	48957	107232	1413	396	984	391
	1965	14188	60650	6977	968	497	405	1289		6424	20901	16157	9296	11263	664	870	1070
	18210	11495	68100	46735	634	105	1082	1261		2247	21313	195773	12620	596	569	745	4571
	6625	138729	39951	109925	1436	359	622	2457		6289	10714	73897	208246	651	376	543	3161
	9617	189303	63708	1937	875	203	625	3088		149232	12601	20805	40502	1362	1971	6778	399
	14835	58436	713472	54776	16432	248	5504	10425		87576	26545	390	2247	4230	1007	313	22574
	4641	26035	22191	10649	380	660	2477	3449		11983	25510	660	67080	2989	304	998	9287
	37681	20145	186834	3519	757	108	7207	3342		160529	6031	34241	5505	804	854	327	308
	9891	18824	33106	10489	1529	565	1305	7714		15940	12594	149756	11598	2043	1658	17176	379
	3256	18513	21131	59253	2187	688	1477	15909		2480	109601	108126	80093	931	773	727	839
	50477	64204	34401	16942	921	3527	3727	1820		6566	42607	38497	32000	545	485	1667	1448
	36543	20071	14874	33473	605	933	3019	474		1918	119780	12387	6212	666	413	8343	521
	31889	80254	82290		879	186	320	1017		28049	113765	203048		2157	752	3429	5519
	18600	155117	222709		1334	321	456	756		46608	502080	65768		16575	369	392	1525
	23486	93205	75963		638	197	13335	3800		1277	63182	105487		1224	7161	1295	11277
	20271	99229	12860		581	442	1186	4193		12374	32727	331454		1823	1655	2984	4863
	21385	88813	154756		355	2154	2376	3836		27087	11396	53928		12526	323	709	5015
	99378	13480	4594		1958	592	1197	4643		22703	11564	118914		2203	748	641	430
	2732	67511	15310		815	2713	1250	2283		96792	61209	78494		806	359	1172	3745
	5637	62720	198117		3913	895	2304	1256		336181	49915	97521		1207	329	3384	739
	100454	187961	195206		1430	1075	1149	4713		27275	21609	21014		1943	273	407	356
	31069	77490	97111		1015	874	6745	3572		5921	16313	386376		1171	340	517	320
	73425	56129	2785		16072	1322	1739	2728		3038	66027	108675		815	471	2546	2563
	31980	71042	16418		537	646	15212	51962		20379	22061	84764		615	6577	380	354
	43691	11098	65444		626	1287	5903	2124		36527	43644	46485		1160	439	545	470
	85728	62312	77448		13621	1136	1179	3064		7390		45881		736	467	1580	500
	37980	6108	8651		1810	1081	1966	3202		16892				2474	462	528	385
	28064	32372	3905		1316	998	1705	4726		99896				1304	326	567	613
	36526	77869	2903		578	1055	6989	28309		17506				3449	406	929	563
	14863	79040	103329		2815	1603	1273	1252		21393				942	468	349	362
	1085	32353	8240		503	480	1450	3967		8314				326	1482	100	4613
	1894	11846	24433		1758	650	1492	455		15610				13543	414	292	547
	37682	43286	2200		3061	1146	1050	1530		5720				423	311	578	4048
	28944	62969	20973		2377	344	1417	605		3622				389	663	3939	550
	7344	25298	27415		797	633	3470	410		23018				454	1041	183	901
	65983	99824	56632		1066	507	1206	1173		873				11329	448	236	1345
	22958	50946	20784		850	1220	1379	403		1925				949	897	1097	455
	12537		44449		2999	583	1224	2702		2958				697	865	435	509
	28697		52454		514	337	11148	11526		42461				214	1775	793	2101
	6494		3557		2313	815	2337	9111		197785				860	1305	1312	2169
	9594		24555		526	408	1288	530		96542				1685	2113	847	2669
	42121		71215		963	348	1858	1647		57037				947	2769	432	3688
	54954		32758		4717	1395	1370	1209		25534				4486	355	585	3690
	1370		47637		1754	570	3165	675		9060				3231	1163	509	9255
	39989		83484		600	663	2137	498		33868				655	334	3327	4386
	2205		36520		1318	512	1648	785		8270				1932	474	6339	1567
	14754		19734		4072	816	1372	495		125488				310	594	316	8320
	1299		6644		10293	397	1043	422		26689				50132	655	895	1919
	33826		52641		14777	626	1395	1111		3708				1528	385	778	17273
	93925		151930		3665	1012	1069	579		35825				12181	398	1412	493
	6734		7044		1670	342	1439	1152		31112				1104	4053	1006	5771
	103900		15934		956	938	4720	612		17560				301	361	816	4596
	86117				8103	1679	2785	492		11990				1964	2273	1137	736
	61452				26370	405	1767	449		60099				1405	425	985	12643
	79416				848	448	406	946		95339				1260	606	959	5708
	11986				3760	1684	6807	566		7132				836	477	773	12838
	114458				1481	1142	668	521		19375				1164	3182	8901	1845
	72036				11036	270	1400			22570				4711	324	348	598
	65659				2635	228	892			57528				1077	794	1378	1514
	107583				5769	1121	598			8488				1027	416	1687	2944
	6086				2982	290	3596			27318				1281	1574	375	4292
	51377				3213	2095	1482			192156				6608	966	1341	657
	27276				4695	2331	415			12566				3200	458	1955	313
	84244				2578	745	743			9296				1443	315	539	592
	58656				4562	1125	1360			18532				868	593	1077	4036
	13456				1588	548	2772			42732				10025	481	555	1588
	58592				1622	303	1508			26674				3676	653	2436	845
	13198				6658	762	1572			30726				3777	508	1178	620
	6467				888	221	606			80508				1262	489	1556	525
	9253				732	100	1558			41758				1001	2203	1196	1328
	53635				1085	354	1092			4451				1355	478	729	410
	13359				2541	157	624			5439				501	757	853	1256
	14816				515	683	1946			833				5605	630	506	5837
	51365				2113	343	469			5013				1337	1459	4461	311
	5700				10985	189	331			16338				345	1346	1915	473
	23532				934	223	2747			37792				1266	914	398	1356
	83567				4431	1040	437			13194				1441	4674	775	6885
	42283				6718	1080	457			103266				5400	762	1726	1011
	7027				725	200	6665			338184				5148	325	1820	828
	55136				1415	222	402			138860				1582	837	914	1918
	25681				1946	216	1290			2214				515	456	876	588
	14741				6833	892	1973			28165				1726	440	507	1016
	31552				647	163	8694			69934				2387	690	1128	631
	83203				1581	271	3193			28082				542	549	433	333
	2672				804	264	2373			100176				1117	395	8266	93021
	867				10836	147	462			16715				1268	613	948	427
	1665				7008	293	814			110256				1540	1647	338	514
	17637				1905	226	5571			9747				2457	576	1654	940
	43932				4375	1132	332			20647				10935	240	566	850
	59884				1141	258	2672			94387				3260	943	359	1344
	5638				6199	1870	444			123970				1595	192	374	1527
	42134				5158	131	1318			8811				7078	162	4997	2105
	33810				1006	827	377			27196				2061	265	2632	16263
	3238				6638	419	376			74952				6838	207	1052	2159
	7281				2381	255	727			4163				525	542	315	6737
	38791				21222	529	11150			156269				554	195	1811	3722
	43017				9346	555	1895			2339				789	356	680	1646
	79400				8509	367	672			4457				5634	500	1614	2625
	6860				1127	501	853			11689				2240	277	1113	2036
	20320				1507	462	4396			14759				1400	415	571	2462
	112663				7723	575	2889			48823				2708	1016	1816	1466
	4699				9277	394	305			94182				905	511	642	5264
	17031				1932	176	6588			2651				1004	1221	1068	1181
	1454				2737	553	106437			1224				1489	350	3068	2383
	2257				2491	500	1054			7203				1557	4816	552	1140
	2582				4069	393	1282			7348				3319	802	15288	2715
	19347				1423	298	10917			321179				12554	1474	472	2382
	51638				622	877	1221			8248				768	599	838	581
	56536				2475	749	4978			7244				635	633	503	1215
					15066	1648	1636			1985				83553	8523	620	859
					1098	1159	1568			15078				5959	386	3110	672
					4343	1335	7307			4922				737	5105	1107	894
					868	1091	1843			39714				71166	609	855	527
					9351	681	10031			9693				3481	442	318	543
					770	982	2683			16411				1291	327	899	4311
					1161	806	3948			28597				837	13347	6614	2386
					841	2230	15980			29655				1039	28316	794	392
					1614	1388	1000			77285				2247	372	1558	1126
					2726	947	1390			325501				1133	379	616	343
					938	3339	22044			28303				1018	14750	1397	1019
					20416	14932	2542			101686				852	4008	714	8021
					1227	534	5054			11901				944	2922	3918	1026
					1678	557	9438			65141				5569	2466	4436	856
					1882	414	7494			121790				1196	3723	511	378
					1205	2548	1051			41857				2774	709	791	625
					3549	385	2274			18860				3100	2360	2487	576
					16957	664	1105			29201				1853	1520	3221	2260
					11249	1238	1281			42057				4614	479	395	858
					962	1242	28895			718				871	17642	1504	584
					1183	2596	1315			61552				1327	1682	2626	1207
					877	807	443			70893				3224	1740	992	847
					1338	702	5715			56142				1003	588	488	331
					9495	17696	394			67906				1516	1200	385	782
					1416	2434	7095			5989				5022	1932	520	5097
					989	4559	342			308319				16763	692	1859	5541
					1473	26564	413			126079				723	923	339	449
					575	9377	1065			45062				6182	2880	4746	1239
					689	5809	3459			102343				11746	1867	502	537
					4945	820	782			72654				1750	5298	565	1649
					1186	3696	1042							617	2722	1151	2658
					745	7639	6492							8037	13318	688	560
					1450	14430	1222							2401	427	341	1165
					3907	2159	4224							3949	3339	513	7184
					2941	25367	1320							822	3145	593	3336
					1010	1191	2753							798	1112	1543	890
					642	12771	1078							793	1454	725	568
					907	1915	5877							3641	1629	416	342
					573	923	10167							6152	332	1116	995
					3535	474	651							1462	3629	1757	11110
					398	1858	3087							867	9574	610	4503
					928	1546	3481							3999	1008	4161
					453	2189	748							3027	33936	1878
					326	941	422							1568	388	532
					460	562	426							817	308	942
					722	1851	1650							3942	824	457
					1030	9042	1795							2541	1051	854
					379	13899	3326							2038	3324	704
					501	3746	312							25516	5061	874
					560	2930	2050							1579	758	3102
					418	3514	1483							629	37441	695
					873	789	373							51586	343	3144
					372	1389	480							10386	4064	891
					475	1003	1335							618	10469	1684
					940	2471	470							721	702	1607
					1102	1675	1170							845	504	1095
					334	1882	3496							1978	7876	7384
					681	2724	639							883	1423	1327
					857	1562	3072							7979	346	755
					2252	317	649							6781	6711	6340
					462	1317	302							11587	358	357
					4331	2814	919							2483	3593	2407
					490	451	1188							6642	370	1121
					589	1241	1491							3084	1204	735
					2710	931	430							562	344	732
					204	538	440							13233	763	336
					269	767	409							1366	368	950
					235	528	1394							3552	10887	413
					194	890	16475							1043	1158	2310
					427	1582	6656							1229	421	575
					135	1168	16760							4381	2636	3530
					2414	387	6894							4153	1277	423
					258	4015	1015							663	768	5567
					185	2208	1566							5757	1581	978
					280	610	25421							7148	487	4393
					133	1794	3819							2136	1173	782
					103	2187	5945							8211	658	1583
					114	6906	1005							1527	2342	516
					149	3465	1759							725	1432	594
					333	682	1020							819	338	2093
					1009	307	1314							654	1265	12503
					1735	908	11237							593	1152	1923
					2003	1436	8702							1780	1103	903
					1442	1361	8370							6899	1391	553
					1131	656	2393							8543	772	6343
					749	2143	1891							1342	9742	1093
					945	1143	21845							1157	496	3069
					1307	422	5021							3659	14838	9626
					541	979	3168							42493	1588	711
					756	420	3216							816	348	884
					641	985	6394							1882	1853	328
					1221	3637	1123							549	4369	712
					115	1661	9023							733	1758	382
					1607	4098	1365							1137	581	605
					2994	1737	13899							4981	493	672
					455	1979	1683							7288		454
					361	1231	1205							840		692
					248	2625	1260							642		332
					371	1417	7839							4355		643
					1047	2319	2598							1369		878
					147	699	1148							1169		4147
					494	759	1325							1415		1079
					2343	2706	2681							1162		1569
					1046	429	13026							696		706
					343	799	1635							2851		614
					786	839	6775							1220		378
					107	401	3269							965		459
					136	5155	1941							504		400
					933	1209	14919							972		2987
					222	888	1012							1278		487
					9112	2972	15275							6688		515
					1224	5452	2004							1392		420
					201	680	1361							825		12097
					831	4828	8407							5635		330
					8373	338	1377							521		1457
					878	2388	4673							690		311
					14704	520	6681							787		944
					1135	551	1738							567		1538
					15171	1394	2147							3374		658
					23028	756	1545							913		480
					748	536	4073							2235		1718
					973	1035	1321							711		508
					1138	1959	1382							611		428
					1781	485	2866							3054		867
					2948	556	1402							1079		482
					545	316	2518							893		921
					628	490	11004							3541		972
					10166	458	3836							1263		381
					3584	1773	1026							2075		409
					2457	388	2334							693		1714
					2384	963	355							800		662
					7145	4539	528							2543		441
					3125	925	378							17012		448
					11400	3809	942							4933		352
					311	444	2213							616		551
					1912	459	932							5860		738
					1421	469	1238							1393		851
					5935	324	431							928		1599
					2536	741	447							1279		403
					2459	488	3034							7030		364
					2533	8027	544							988		404
					4162	328	349							3301		1624
					1618	475	752							387		529
					1460	1589	2854							746		302
					1467	944	808							670		1296
					3122	753	3093							1745		390
					4528	362	548							679		38992
					960	1473	3822							7410		5945
					2673	540	575							933		1062
					154	346	640							1187		3633
					11521	732	2749							2362		590
					16086	313	399							582		1584
					870	1451	461							485		834
					177	997	1952							1518		356
					300	470	388							781		1318
					3203	2318	702							10564		2271
					765	3111	385							982		1742
					5067	3975	1401							609		1003
					695	22634	841							1230		493
					1207	2190	1555							4573		2049
					1943	1158	607							2976		968
					14006	4271	561							287		337
					5180	25528	514							592		370
					1446	611	438							1249		1539
					904	734	704							1159		397
					12850	1553	818							1593		5986
					1065	360	836							6556		1039
					2157	323	2996							786		3557
					3466	489	356							8858		2363
					3745	1259	1540							1771		1465
					1548	573	379							2884		4228
					543	601	517							1565		323
					2971	4113	425							528		2557
					1330	361	2629							550		3452
					1151	1592	569							21334		1351
					1200	1263	881							3654		907
					19390	391	365							4493		630
					1904	1018	1338							585		1940
					3318	502	380							4555		4209
					8733	1356	2072							1715		3408
					3927	2721	3335							2202		500
					832	1349	761							1800		719
					2011	1772	522							4495		7186
					1096	1899	449							1566		7757
					1852	2163	1726							1887		2673
					763	1875	655							1205		619
					2000	1207	2215							864		8202
					7146	5888	433							1020		2690
					1361	867	368							30517		1620
					8045	1537	1151							1879		612
					1746	887	22640							11759		2822
					512	496	801							566		379
					1081	667	795							4023		1060
					506	661	5158							9534		705
					601	1447	730							4554		4330
					958	1341	2599							1123		469
					530	948	1355							24366		3962
					565	999	1301							2011
					1302	4078	3825							5638
					3116	8860	9093							678
					1366		681							995
					3644		3838							6505
					834		1729							719
					200		367							890
					1073		1233							3216
					163		764							738
					1240		11105							773
					348		1262							523
					215		2375							658
					145		472							650
					425		2892							9009
					3893		552							887
					1453		1284							537
					10410		288							898
					1180		101							1089
					6406		175							1063
					6999		7109							757
					376		338							692
					882		587							969
					244		825							1596
					2684		498							5899
					1273		519							245
					356		6433							7700
					1208		520							1228
					1333		1199							12219
					464		2229							213
					1833		12727							3460
					4864		1164							400
					2847		4488							480
					3866		1869							381
					409		9408							720
					1724		1323							955
					236		1430							8801
					3339		424							29260
					296		632							409
					216		384							12022
					4776		800							1483
					5640		8741							399
					3251		2465							2923
					703		314							625
					743		2938							4095
					15583		2744							192
					1973		381							5059
					1879		1950							171
					225									165
					550									5802
					386									176
					858									1639
					2431									322
					559									579
					829									526
					819									3532
					769									5969
					4687									109
					8759									847
					3676									463
					881									8934
					7565									15185
					6024									749
					729									380
					1745									739
					3848									499
					2740									1183
					2966									922
					969									1111
					1739									1649
					2317									10628
					1382									1319
					3090									4127
					3901									1242
					1426									1060
					1373									305
					5421									581
					1409									503
					203									300
					192									587
					2809									10048
					5859									520
					889									3843
					555									2691
					9383									6329
					3921									2179
					6062									999
					1017									10561
					193									653
					2359									4628
					373									13441
					576									750
					1391									1059
					717									884
					1121									9405
					2247									42911
					1352									1041
					5460									2516
					2640									19904
					2349									998
					802									726
					957									1095
					1139									1251
					4412									11089
					2672									2968
					2432									1950
					11435									834
					2305									1774
					377									900
					11711									2465
					571									14972
					2058									2565
					2951									920
					2286									7186
					3088									533
					16263									4735
					9644									1766
					416									688
					1061									1042
					855									2820
					1020									1125
					1230									2429
					2671									5865
					15000									1002
					325									1862
					588									2051
					324									2564
					396									704
					663									756
					2059									1379
					619									8245
					430									7208
					5704									3928
					9849									1361
					1287									4926
					2171									2954
					9311									700
					1474									1410
					1496									5236
					2744									1786
					9633									1356
					5718									3273
					12000									11842
					2793									907
					517									986
					854									1407
					1164									538
					8879									5428
					527									6467
					307									1306
					540									505
					2344									11394
					686									11575
					794									672
					5739									1408
					2042									529
					7916									4674
					2937									1741
					1214									26236
					2131									1376
					3952									1982
					972									842
														2396
														5408
														2911
														3919
														1265
														1231
														1114
														637
														573
														662
														987
														831
														4428
														4008
														2289
														1779
														2261
														2283
														1394
														1835
														808
														2090
														1691
														2549
														5793
														517
														356
														303
														1620
														482
														1822
														1310
														552
														4657
														36850
														1061
														28303
														1440
														3235
														3995
														10733
														619
														1868
														4040
														8326
														27530
														6536
														1969
														25645
														9838
														1549
														535
														548
														7882
														20785
														2303
														1477
														843
														5485
														859
														586
														5399
														5920
														691
														2152
														556
														1198
														2040
														694
														2170
														832
														8254
														1388
