# Supplementary material for: Coordination between ECM and cell-cell adhesion regulates the development of islet aggregation, architecture, and functional maturation
Source: eLife. 2023 Aug 23;12:e90006. doi: 10.7554/eLife.90006 (PMC10482429; doi:10.7554/eLife.90006)
Supplement: Figure 1—figure supplement 1—source data 2. [file elife-90006-fig1-figsupp1-data2.xlsx]

## Sheet: Suppl 1-1E
Insulin area/Pancreas Area
Control (n= 4)	Summary:								Mutant (n= 4)	Summary:
	% Ins Area	T1	T2	T3	T4	average	SEM			% Ins Area	T1	T2	T3	T4	average	SEM
	ins_sum	3706672	976086	2157140	545156					ins_sum	6151738	1690111	2339119	849591
	Islet Area_sum	4448240	1175818	2714901	726646					Islet Area_sum	7448631	1964241	2948344	1194928
	Ins/Islet Area %	83.329	83.0134	79.4556	75.0236	80.2054	1.93766			Ins/Islet Area %	82.5888	86.044	79.3367	71.0998	78.8268	3.19726
	Islet Area (pix^2)				Ins Area (pix^2)					Islet Area (pix^2)				Ins Area (pix^2)
	T1	T2	T3	T4	T1	T2	T3	T4		T1	T2	T3	T4	T1	T2	T3	T4
	121816	35062	24684	19962	32521	23873	18690	14281		102244	42752	8832	54761	76114	16566	10041	43678
	43510	69609	46046	26530	97913	49481	27519	21288		74943	87407	162623	44667	71788	179	139766	27020
	39851	273168	45295	14713	30700	79052	38715	14023		94960	8742	63184	71777	1046	521	47384	36802
	191688	57870	21475	69018	157898	158980	15710	64909		6443	4731	58945	42802	5125	468	45353	29508
	1813	62059	54783	74968	1999	3293	38245	1182		117952	34847	4432	80113	98651	76433	4982	40022
	4456	60979	58228	11989	4690	51345	35299	42772		3588	20966	263989	12008	2856	5941	235787	6848
	10595	26758	12088	51714	11391	45762	13699	9971		34272	2008	7497	15566	27358	3177	7550	9660
	117947	56529	186846	5365	121015	51230	150916	39658		21804	7558	47294	249963	13652	24604	34186	173440
	55220	10775	8591	2627	47034	23171	4000	4004		18960	87376	3352	26469	11580	12743	3456	32570
	12540	7551	760535	23913	7166	50509	633965	2055		20902	3042	39802	136354	16580	1271	2878	111234
	99568	165556	9022	11040	89380	7094	6396	18320		9739	52961	8882	2718	7607	4980	25846	2302
	24171	97415	24528	8902	20402	7633	20264	7543		8086	47946	2232	46172	6919	59441	6160	42762
	21488	6958	2582	12690	18152	141438	2310	6511		4440	43133	13536	13150	3001	2146	2439	2665
	46976	46249	189500	108294	41336	88338	150823	6851		33019	20887	11377	15485	5496	45019	12524	9561
	22935	31483	30574	27765	5189	4350	14044	91834		36315	28101	48651	1046	30740	37310	8409	57754
	5698	25024	144074	7775	23875	30454	118015	26833		4106	13526	27734	4665	977	29710	44970	44457
	518	5833	7680	28484	1567	21453	10778	6006		42926	7193	8378	99605	745	15664	10545	66089
	1965	31798	29419	9430	2118	31989	26505	18258		6424	116604	72488	50641	29395	13491	2775	10828
	18210	7681	165169	91835	16858	5241	147255	6365		2247	11793	15735	83396	3791	7446	5136	6836
	6625	37521	5849	34494	7021	25684	4308	56142		6289	26373	43610	11989	42614	3608	54318	68559
	9617	9038	21546	2587	7541	498	12543	19391		149232	33495	18890	4380	1282	97151	10908	6980
	14835	5478	128127	25178	12070	567	508	2385		87576	6412	39327	78083	4690	9715	25479	13321
	4641	36278	71849	6198	4036	31583	96172	16820		11983	97909	4110	15358	61941	18439	1347	6533
	37681	9146	117895	51175	44065	6586	46520	1600		160529	6193	11466	20925	530	14840	14755	162
	9891		34778		11296	962	87417	5679		15940	94841	196236	3873	42517	2464	27310
	3256		23213		5213	28333	28160	40475		2480	18324	71482	8962	76413	60267	4591
	50477		178270		45556	7187	21210			6566	72610	19813		8859	1304	9456
	36543		17556		31343		147431			1918	12933	4212		120037	70866	100799
	31889		13080		28021		11635			28049	2660	21059		11684	16223	48124
	18600		54822		9813		12454			46608	29526	18062		1951	54290	2840
	23486		55743		11218		45357			1277	15365	15562		6023	3245	30011
	20271		55004		9708		34088			12374	5062	10672		1355	6604	3147
	21385		86013		15058		42135			27087	7984	145100		23016	1874	2464
	99378		2988		72379		63393			22703	30496	160582		42797	18580	1548
	2732		25842		664		3078			96792	172457	1822		1083	8138	3472
	5637		1207		679		26460			336181	39767	70794		10564	3917	19328
	100454				4490		1123			27275	67256	23533		19448	6743	12144
	31069				93043					5921	1155	13427		22730	20834	13185
	73425				21086					3038	58822	15063		87475	122204	5082
	31980				75078					20379	9180	237056		3594	227121	7592
	43691				26670					36527	49490	76623		1229	34837	100629
	85728				37540					7390	69941	118012		272186	4695	119021
	37980				72988					16892	13929	74797		824	35979	17879
	28064				36915					99896	162061	109287		1024	47159	2682
	36526				25544					17506	2584	3282		1313	43414	57823
	14863				31992					21393	7141	341603		9569	3647	23881
	1085				13168					8314	27731	109324		935	29130	12622
	1894				3203					15610	12533	2665		22153	58235	9269
	37682				31883					5720	2535	47866		5654	9670	181360
	28944				23699					3622	1119	28845		3077	140372	1499
	7344				6567					23018	111660	11945		15644	5870	59742
	65983				60316					873	25604	920		33050	26276	86040
	22958				20256					1925	27520	12334		3904	6868	59058
	12537				11974					2958				11661	977	72987
	28697				25337					42461				96003	73616	4392
	6494				5588					197785				13428	19945	1342
	9594				8940					96542				6204	23884	294897
	42121				40646					57037				11420		95939
	54954				41678					25534				4232		2542
	1370				1342					9060				12893		38854
	39989				39707					33868				6100		27561
	2205				2952					8270				18699		8156
	14754				12934					125488				1402		758
	1299				2404					26689				3438		12099
	33826				34212					3708				1880
	93925				84294					35825				38080
	6734				9841					31112				178783
	103900				97168					17560				34902
	86117				67219					11990				847
	61452				48312					60099				48827
	79416				79326					95339				10563
	11986				12338					7132				6890
	114458				96300					19375				31156
	72036				54554					22570				8369
	65659				65066					57528				114807
	107583				80817					8488				22586
	6086				3030					27318				2343
	51377				47955					192156				19610
	27276				19352					12566				27801
	84244				72955					9296				16680
	58656				48843					18532				11265
	13456				11761					42732				55148
	58592				2249					26674				83015
	13198				7799					30726				3310
	6467				39500					80508				17274
	9253				11652					41758				24243
	53635				14443					4451				49408
	13359				47170					5439				3537
	14816				6194					833				622
	51365				15428					5013				9910
	5700				73812					16338				6194
	23532				35198					37792				879
	83567				5087					13194				161410
	42283				59483					103266				13175
	7027				18612					338184				8387
	55136				12171					138860				17548
	25681				23513					2214				39213
	14741				54882					28165				25029
	31552				1959					69934				30186
	83203				756					28082				63213
	2672				1549					100176				506
	867				12997					16715				701
	1665				37604					110256				33182
	17637				49340					9747				1097
	43932				5886					20647				4824
	59884				37291					94387				2054
	5638				30101					123970				4787
	42134				2365					8811				9971
	33810				3796					27196				35118
	3238				23614					74952				12007
	7281				31137					4163				90986
	38791				67396					156269				336932
	43017				1245					2339				128980
	79400				14930					4457				2038
	6860				82569					11689				19171
	20320				809					14759				55470
	112663				578					48823				23451
	4699				3019					94182				78411
	17031				934					2651				11198
	1454				1401					1224				554
	2257				412					7203				1165
	2582				1662					7348				74930
	19347				16256					321179				599
	51638				44301					8248				7882
	56536				47404					7244				16211
										1985				80028
										15078				76219
										4922				1054
										39714				2568
										9693				20682
										16411				282
										28597				58118
										29655				4527
										77285				122390
										325501				807
										28303				4393
										101686				9219
										11901				10755
										65141				40561
										121790				73071
										41857				1922
										18860				930
										29201				8225
										42057				9172
										718				276407
										61552				4746
										70893				5959
										56142				2422
										67906				11182
										5989				954
										308319				30694
										126079				5461
										45062				14111
										102343				15798
										72654				27255
														82197
														288185
														22971
														66251
														4304
														593
														8821
														48368
														80965
														30622
														15202
														22581
														41610
														56946
														57868
														34581
														53959
														6858
														264080
														120304
														55682
														109813
														59684
