# Supplementary material for: Coordination between ECM and cell-cell adhesion regulates the development of islet aggregation, architecture, and functional maturation
Source: eLife. 2023 Aug 23;12:e90006. doi: 10.7554/eLife.90006 (PMC10482429; doi:10.7554/eLife.90006)
Supplement: Figure 1—figure supplement 1—source data 3. [file elife-90006-fig1-figsupp1-data3.xlsx]

## Sheet: Suppl 1-1F
Somatostatin area/Pancreas Area
Control (n= 4)	Summary:								Mutant (n= 4)	Summary:
	% Sst Area	T1	T2	T3	T4	average	SEM			% Sst Area	T1	T2	T3	T4	average	SEM
	sst_sum	310224	605836	745311	187678					sst_sum	778600	322687	397165	387317
	Islet Area_sum	1636055	3589675	4588664	840708					Islet Area_sum	2875580	2362167	3052927	1891627
	Sst/Islet Area %	18.9617	16.8772	16.2424	22.3238	18.6013	1.37003			Sst/Islet Area %	27.0763	13.6606	13.0093	20.4753	18.5554	3.30415
	Islet Area (pix^2)				Sst Area (pix^2)					Islet Area (pix^2)				Sst Area (pix^2)
	T1	T2	T3	T4	T1	T2	T3	T4		T1	T2	T3	T4	T1	T2	T3	T4
	8435	34983	175790	11191	141	532	157	1624		7037	17811	16833	14861	239	549	2890	4076
	2006	101786	33329	2842	136	5077	184	359		19988	20847	13714	119614	126	881	620	618
	101307	83217	8838	76383	176	542	320	288		44967	127973	158713	14161	267	2884	3668	1590
	3535	6112	25114	111051	111	2253	446	1552		5440	5588	56640	36201	313	534	389	436
	28266	55769	80125	41271	636	919	142	2527		11925	79967	51645	122439	709	995	572	5669
	14312	316381	178164	39630	1158	3104	450	488		20014	26173	10291	111442	1433	742	502	807
	137545	46841	17830	9926	311	603	141	3871		12402	87711	28889	234049	1930	944	869	3222
	11160	308977	532019	12317	135	832	108	766		6105	11110	55161	41255	5344	506	358	1532
	2431	9077	52138	5523	148	1126	708	773		322	8605	12352	39513	869	498	604	365
	13131	5843	2709	4647	110	11727	560	718		19823	52175	44782	4388	2121	1320	373	550
	4210	72241	7206	14793	106	1645	150	490		76006	90531	13403	2783	744	1156	691	926
	2394	45060	4935	34416	878	324	165	884		22908	171809	14886	64400	603	362	1914	716
	2102	34875	14420	11074	189	2301	159	1309		94431	96503	10907	29532	2241	1435	2314	576
	4519	20404	8736	12637	128	988	207	2349		102151	54605	3260	375613	736	816	6654	1337
	1131	66746	15332	42847	130	1025	169	8668		98605	42288	65635	83542	5287	2426	447	4528
	20343	31974	8699	12633	107	571	192	407		3656	33045	48361	15203	1141	408	626	7141
	9429	121174	13830	42852	455	979	189	476		7762	11737	48957	107232	441	577	1028	778
	4022	14188	60650	6977	191	2557	114	3099		39978	20901	16157	9296	903	1686	2515	522
	6728	11495	68100	46735	463	1220	107	389		41333	21313	195773	12620	7981	991	866	399
	92153	138729	39951	109925	237	2263	117	554		7297	10714	73897	208246	1187	532	733	1098
	2384	189303	63708	1937	437	699	145	984		3971	12601	20805	40502	338	761	357	622
	18608	58436	713472	54776	412	1294	412	3231		61035	26545	390	2247	717	8819	618	1308
	10100	26035	22191	10649	525	1029	292	444		37390	25510	660	67080	4563	731	864	635
	60727	20145	186834	3519	681	2121	261	483		5969	6031	34241	5505	631	572	1055	898
	1549	18824	33106	10489	102	1462	135	858		8658	12594	149756	11598	1969	1447	2394	630
	79930	18513	21131	59253	675	301	263	413		28201	109601	108126	80093	4548	997	841	530
	62213	64204	34401	16942	550	692	144	2448		11580	42607	38497	32000	1192	1970	346	538
	1572	20071	14874	33473	452	972	147	828		31854	119780	12387	6212	1349	1477	510	956
	1604	80254	82290		4386	815	204	1194		3942	113765	203048		553	594	1787	3618
	19326	155117	222709		7334	518	929	1266		19962	502080	65768		248	425	3184	644
	1687	93205	75963		2009	325	1152	708		3249	63182	105487		169	514	430	4605
	60499	99229	12860		3331	384	1537	348		21050	32727	331454		671	1559	937	662
	3877	88813	154756		1140	2906	2267	362		10913	11396	53928		5731	6514	659	24986
	4280	13480	4594		1605	7184	500	960		24042	11564	118914		1233	3426	555	925
	3934	67511	15310		4184	7625	3394	3680		71090	61209	78494		800	1114	2362	374
	5037	62720	198117		526	400	6415	1271		255383	49915	97521		3012	331	1007	1447
	54741	187961	195206		390	492	740	1226		3258	21609	21014		1019	1298	3182	349
	11646	77490	97111		839	13868	858	2394		30878	16313	386376		4075	550	1146	1390
	21774	56129	2785		884	2800	187	1873		3494	66027	108675		1203	1723	1288	676
	95577	71042	16418		307	1347	1470	3763		292115	22061	84764		366	3751	1330	455
	1228	11098	65444		697	655	722	12610		61719	43644	46485		877	10166	489	1637
	3515	62312	77448		545	911	5823	2954		113378		45881		586	1201	641	759
	81567	6108	8651		3769	385	443	360		161617				1294	1251	204	592
	23868	32372	3905		4249	5428	736	668		24525				548	1316	2646	1863
	9019	77869	2903		613	633	490	459		23207				692	254	827	517
	5710	79040	103329		402	8403	2389	566		21888				1434	198	560	386
	6347	32353	8240		581	1348	348	1999		2637				5170	152	669	359
	18850	11846	24433		4507	1020	1353	2042		12206				2231	483	508	4333
	5839	43286	2200		243	1249	1605	5283		9522				711	423	2002	875
	22324	62969	20973		936	397	1037	2886		28176				946	4276	242	306
	3113	25298	27415		267	4130	744	4036		16620				7213	1001	748	766
	3277	99824	56632		938	2185	565	2407		9157				7481	886	350	409
	1826	50946	20784		341	3879	1761	1667		6297				1587	901	2711	382
	408		44449		344	441	1021	1250		11473				651	3929	3050	793
	2439		52454		316	1568	3408	993		2662				2523	1086	682	527
	2706		3557		281	4643	770	597		10665				3178	340	2382	976
	29378		24555		2056	581	421	3212		6417				2694	470	1136	791
	2721		71215		8972	3618	3144	427		6972				2329	1302	355	659
	45663		32758		2489	934	301	724		4821				3367	1165	5667	1301
	1487		47637		2729	407	1523	420		44667				1171	1899	699	863
	38410		83484		1859	1046	700	584		189480				563	326	6406	930
	11164		36520		11377	738	677	581		106707				17185	1468	4947	1037
	3655		19734		1380	958	2061	792		11157				1507	313	712	456
	3720		6644		3856	1820	3584	694		20005				1210	718	406	3486
	3037		52641		9369	914	1552	3530		11955				6710	455	467	1595
	13935		151930		4767	1978	2443	445		19983				8095	1801	752	3006
	3263		7044		1819	388	3147	7610		3615				1928	456	1043	672
	7991		15934		1095	521	584	7252		296292				531	1090	875	2065
	3064				461	1313	627	598		17391				685	2286	412	381
	56568				594	5722	371	426		13308				6529	1272	443	1070
	13390				3531	1181	801	821		4591				263	697	1237	422
	6403				154	908	1532	319		3047				644	429	862	380
	1900				415	564	438	4426		19077				638	388	899	3233
	5524				914	383	1371	318		10162				469	1417	2722	390
	12108				2257	4292	902	10225						1897	5975	527	1960
	8658				139	356	407	999						545	372	913	13863
	5671				241	1055	554	433						1550	418	478	583
	819				2332	5764	6743	1206						387	898	908	4132
	1365				4269	661	3137	3322						1102	2149	4989	480
	20270				2499	12173	510	361						1029	646	14687	1571
	3778				698	5435	643	1610						719	208	4126	387
	45250				1018	5893	470	471						1729	292	1129	612
	7546				303	4333	1937	1785						280	542	4925	4716
	46157				1195	546	363	4051						571	1245	569	648
	2818				1531	4196	362	8398						478	1211	2273	1230
	4827				538	3956	352	1264						10768	479	11988	6537
	29842				900	1803	2079	7077						17090	986	470	658
	1552				1114	4300	476	752						1610	620	1032	798
	4270				1585	784	669	316						2875	460	4785	3216
	3350				940	774	695	3403						1503	3138	433	433
	4241				1002	565	379	2322						1535	980	427	542
					989	1057	3800	698						940	445	300	802
					1752	778	482	498						1026	1459	2272	1403
					1120	2635	956	555						565	800	818	1365
					269	478	495	1038						807	1289	1822	4043
					276	5390	319	1056						2196	1219	338	403
					185	2461	381	1557						1078	3749	504	1690
					719	1721	1161							217	5047	1455	351
					3088	315	703							3344	1432	425	1136
					1020	447	759							690	369	18414	3202
					622	373	746							116	2183	728	585
					587	752	401							5472	3427	1786	5082
					228	1729	374							170	1120	390	951
					794	1620	1502							356	4742	660	325
					233	630	543							656	2154	4938	4602
					948	528	837							1369	406	852	341
					895	920	962							677	2178	1101	11306
					367	5533	447							12124	723	1274	458
					284	1606	524							727	402	491	391
					268	1467	347							8388	333	627	2470
					393	720	861							5548	1239	778	465
					1557	588	561							1046	432	884	17018
					6333	487	544							10250	1037	953	393
					2761	1852	867							697	626	668	647
					357	2336	582							678	1247	2917	3166
					2878	1861	336							12351	3371	6611	1691
					1130	419	632							1520	2470	541	795
					1737	4702	3797							771	306	1417	1926
					1519	818	541							891	4717	1414	9343
					528	1182	329							1484	7799	1312	1456
					738	2110	538							1362	1187	654	9357
					577	623	660							532	1233	1005	1600
					421	3357	2374							8195	7549	1575	411
					433	610	619							843	776	3652	838
					502	2744	2277							1616	1313	806	3735
					672	1532	2057							852	413	400	735
					1232	11060	685							2998	1525	1154	628
					373	2884	792							2332	1255	592	605
					735	1412	387							9507	396	517	13294
					219	922	380							1736	1508	2254	7694
					119	445	645							878	1364	969	1930
					381	527	642							127	3026	1166	478
					297	1030	2152							1099	11027	608	1852
					282	10380	686							301	441	375	2971
					108	398	1890							964	970	642	1628
					1621	712	843							528	9394	459	3688
					518	303	2027							330	431	919	498
					727	1346	1221							968	359	1277	423
					129	825	1917							1085	4473	381	343
					1321	1389	453							641	4352	766	5349
					950	654	557							135	461	1801	1371
					1001	814	2932							457	1732	1873	1888
					1727	927	1498							435	556	2597	29420
					931	522	418							3650	1244	8259	1858
					401	579	2029							4721	1180	1707	2066
					405	545	342							3023	324	1775	2878
					6200	725	310							3823	3013	507	2821
					1708	1728	465							2821	2030	1015	1151
					403	830	4848							28932	730	1831	2047
					361	439	1225							1451	1998	479	1219
					197	686	550							11747	449	6414	677
					18714	7626	1974							4320	7159	1617	466
					1768	1914	3423							1067	671	7949	414
					287	2383	451							7953	5347	1343	961
					1535	1577	2289							12254	337	1372	1211
					1840	601	4398							7208	469	1957	1830
					739	4021	1360							2940	978	1259	836
					440	998	580							2797	495	915	1384
					1598	350	2920							11680	4522	1252	1213
					3771	2038	2879							9075	370	303	872
					2583	386	9369							1581	884	309	3736
					458	354	1379							5351	1173	5078	2354
					1060	876	4188							2112	2963	330	575
					206	1844	5580							3269	407	662	3133
					1050	885	3222							1995	601	1430	833
					2062	4200	2636							1028	804	2073	1635
					600	433	1372							1372	648	1162	1416
					295	1761	8114							4094	2107	991	1020
					283	339	2256							7802	1250	1333	2409
					2339	823	1816							7097	1246	7417	454
					164	3068	1609							4288	4328	640	1154
					386	1438	2490							1740	639	341	808
					1153	2341	1107							2222	561	689	1040
					477	641	1124							3746	627	2741	505
					1021	1082	1841							2542	1823	693	432
					331	587	1428							13804	591	1094	580
					262	9529	1882							1399	640	559	301
					231	342	1355							2224	3503	823	866
					722	1260	3045							643	2644	1356	385
					4723	933	6925							1031	330	414	1003
					6077	1217	1398							216	3472	720	476
					912	1038	8252							384	7588	426	596
					797	507	1894							1064	414	1019	689
					473	884	3804							474	8004	498	1094
					1118	1855	2670							421	945	990	3175
					523	666	3266							769	653	584	485
					1165	589	1420							2911	315	551
					602	690	2597							584	2782	4493
					578	376	2827							249	811	844
					1441	2793	1776							439	907	736
					1176	789	4217							1487		578
					147	337	1058							672		312
					264	1329	2675							11317		529
					137	996	1001							1407		1115
					230	1301	2342							630		397
					1211	1988	5487							185		810
					188	2626	535							107		4762
					150	514	388							1125		302
					1291	305	826							503		563
					2714	31268	1895							508		769
					4577	2904	346							106		625
					732	1349	894							2766		1579
					590	2457	1344							4633		1159
					493	1132	1596							732		2883
					1295	1734	4513							351		4524
					822	1557	789							1539		301
					245	1012	358							5597		483
					3534	1518	965							850		512
					1601	7277	507							485		530
					2142	470	1198							4648		2824
					501	2698	1011							1182		683
					641	1823	330							5753		854
					996	1338	345							1103		1596
					1527	382	1630							1817		1042
					2315	657	587							6726		656
					2088	3861	1730							578		605
					1214	1259	1887							683		630
					5746	321	2847							2887		304
					2036	1891	1404							766		3733
					1198	1912	728							5831		956
					1437	1414	1035							1082		1242
					251	5389	423							2248		1220
					2952	1253	1978							2126		1777
					2070	1092	1104							518		515
					306	2273	426							3739		802
					955	1211	3318							1526		943
						1442	1009							2213		1269
						4589	589							1925		1463
						2566	1795							3438		599
						1094	1078							11766		1321
						1599	1014							9794		1697
						4077	1050							551		2494
						2193	486							324		399
						1594	949							593		822
						2387	3070							317		2389
						5579	332							2494		1156
						1202	433							2083		465
						1024	8946							437		1998
						5584	477							519		745
						2807	1112							1818		1769
						2328	612							1378		2695
						2747	1052							1845		4464
						994	1770							2487		1134
						1362	626							2194		606
						1814	603							1706		938
						485	552							1106		1357
						652	766							12164		392
						647	2377							43399		366
						309	664							8320		396
						336	1003							2610		2139
						307	1008							3912
						1163	578							1762
						541	525							1222
						5980	2081							6634
						5715	1941							5212
						1272	1982							9427
						2365	4018							4161
						1233	1613							12119
						6327	670							2986
						1489	1005							2139
						1117	393							2802
						594	803							6106
						1102	471							2790
						1072	366							4936
						349	1174
						1256	1804
						1900	1854
						9008	1576
						412	493
						404	503
						574	3098
						999	721
						1043	796
						626	324
						1210	930
						1076	752
						503	414
						1546	12014
						466	3029
						1154	527
						9391	2659
						1068	5164
						6762	300
						672	1928
						893	1847
						1320	682
						1992	698
						1429	4824
						736	1180
						628	2916
						2085	3740
						316	2583
						760	1308
						1423	10236
						585	649
						368	516
						330	811
						409	1389
						413	9197
						2380	829
						6071	1598
						1705	3684
						584	859
							943
							780
							558
							977
							1178
							5810
							428
							911
							1751
							1255
							1118
							1340
							351
							2743
							8186
							656
							3844
							591
							2182
							732
							1096
							377
							437
							908
							400
							979
							6110
							1631
							5984
							961
							1177
							621
							8171
							2008
							970
							2921
							3301
							15638
							3083
							10820
							1038
							2500
							833
							673
							1108
							641
							394
							7481
							2080
							967
							1645
							2121
							2022
							1168
							972
							1364
							1493
							5653
							1572
							530
							905
							1823
							1768
							953
							333
							1247
							981
							513
							754
							817
							7797
							609
							311
							337
							1728
							359
							942
							1361
							938
							3392
							4919
							572
							1418
							223
							581
							128
							661
							1128
							1329
							617
							1724
							487
							891
							1059
							1787
							1583
							2508
							13096
							4226
							756
							9421
							800
							1568
							718
							2015
							431
							1555
							508
							492
							680
							614
							2244
							2672
							316
							537
							1302
							4204
							2066
							1522
							1489
							821
							235
							376
							570
							8671
							441
							763
							452
							689
							2031
							12439
							361
							2599
							373
							350
							920
							672
							1149
							314
							2421
							312
							390
							392
