# Supplementary material for: Coordination between ECM and cell-cell adhesion regulates the development of islet aggregation, architecture, and functional maturation
Source: eLife. 2023 Aug 23;12:e90006. doi: 10.7554/eLife.90006 (PMC10482429; doi:10.7554/eLife.90006)
Supplement: Figure 1—figure supplement 1—source data 4. [file elife-90006-fig1-figsupp1-data4.xlsx]

## Sheet: Suppl 1-1G
Pancreatic polypeptide area/Pancreas Area
Control (n= 7)	Summary:														Mutant (n= 6)	Summary:
	% Ppy Area	T1	T2	T3	T4	T5	T6	T7	average	SEM						% Ppy Area	T1	T2	T3	T4	T5	T6	average	SEM
	ppy_sum	442296	104413	84920	132062	473485	284511	388206								ppy_sum	497604	200604	208496	147214	321588	245996
	Islet Area_sum	1819793	976538	2323635	662109	1367026	992553	1231603								Islet Area_sum	2527846	1964241	2948344	1194928	1310040	876900
	Ppy/Islet Area %	24.3047	10.6922	3.65462	19.9457	34.6361	28.6646	31.5204	21.9169	4.27793						Ppy/Islet Area %	19.6849	10.2128	7.07163	12.3199	24.548	28.0529	16.9817	3.42971
	Islet Area (pix^2)							Ppy Area (pix^2)								Islet Area (pix^2)						Ppy Area (pix^2)
	T1	T2	T3	T4	T5	T6	T7	T1	T2	T3	T4	T5	T6	T7		T1	T2	T3	T4	T5	T6	T1	T2	T3	T4	T5	T6
	11489	35062	45295	19962	5088	43327	17244	2878	478	8838	634	363	3499	1220		31412	42752	8832	54761	5902	11994	894	1710	208	18651	2418	879
	41705	69609	21475	26530	43491	28767	34673	141	327	1245	624	1126	1312	1107		97282	87407	162623	44667	362149	895	4026	1148	118	19067	1187	661
	34498	273168	760535	14713	9143	104150	6192	214	996	2746	252	101	619	10142		301092	8742	63184	71777	10630	17512	2302	774	122	3333	7024	703
	72948	57870	9022	69018	1124	11696	1814	302	1698	1413	400	3459	545	1509		144561	4731	58945	42802	1314	9506	399	339	865	2934	820	6330
	8392	62059	24528	74968	3212	10930	10075	2249	751	1833	1617	185	767	1455		25420	34847	4432	80113	21460	7383	369	450	183	3398	401	3039
	96559	60979	2582	11989	17913	6017	5604	259	966	4071	108	1027	491	188		5425	20966	263989	12008	1129	14128	1352	1901	226	157	315	306
	72330	26758	189500	51714	3282	13808	1060	113	554	1430	406	829	514	410		164282	2008	7497	15566	13213	206422	527	930	715	150	12419	354
	64867	56529	30574	108294	3053	10730	22924	177	1158	2810	100	4768	1199	250		13459	7558	47294	249963	1319	11255	734	488	117	283	544	443
	95672	10775	144074	27765	28963	51332	27836	295	889	2114	140	389	14075	528		102336	87376	3352	26469	68083	10007	300	610	173	263	14905	223
	33193	7551	7680	7775	2711	144863	56135	258	717	1393	130	204	947	575		8780	3042	39802	136354	343	41428	432	2932	376	182	358	105
	29662	165556	29419	28484	67588	6400	9338	419	1647	1004	216	1220	5036	1362		148041	52961	8882	2718	47097	152679	856	2108	113	1876	721	740
	11747	97415	165169	9430	7649	5876	28460	183	1685	696	641	792	674	1005		25567	47946	2232	46172	72095	78952	407	707	275	355	14612	159
	66861	6958	5849	91835	1234	1312	184411	2333	1875	574	374	2521	2250	361		71449	43133	13536	13150	37674	13499	434	1353	3296	375	651	234
	49714	46249	21546	34494	3398	821	4762	343	957	971	2334	115	362	467		56416	20887	11377	15485	765	55314	25669	3565	107	185	13657	4151
	15156		128127	2587	65662	3738	11991	674	3445	564	411	4056	425	586		13773	28101	48651	1046	34032	71110	413	315	126	758	1042	352
	24747		71849	25178	2340	12746	1689	112	503	911	701	1276	1079	6163		49489	13526	27734	4665	7387	135363	350	570	278	173	354	241
	28808		117895	6198	16027	1846	2218	475	603	507	663	124	2297	5612		20397	7193	8378	99605	205164	33557	1963	778	392	574	2357	706
	29450		34778	51175	6583	254	21120	645	638	2024	2023	4873	2414	1956		12014	116604	72488	50641	33243	5896	3597	1136	106	2542	1931	343
	13806		23213		72273	73715	80898	237	1953	836	1678	764	400	633		93693	11793	15735	83396	14744		6918	1240	405	540	346	1803
	28694		178270		57499	36079	122020	1736	559	599	1761	3209	311	1561		15060	26373	43610	11989	2364		633	661	175	530	15384	5480
	42191		17556		22974	41621	4461	1102	935	676	469	9987	927	1447		274300	33495	18890	4380	75094		1967	694	214	322	1300	571
	90470		13080		34220	54556	1187	202	1203	2642	415	506	481	997		107303	6412	39327	78083	463		2191	173	359	1851	996	4595
	17193		54822		1999	171879	4348	144	584	2518	666	9114	772	2375		105111	97909	4110	15358	7461		4153	218	150	129	1487	1136
	19674		55743		6966	110412	3195	129	566	1048	1447	1636	4502	1859		4570	6193	11466	20925	52704		343	125	157	237	391	6696
	46084		55004		22445	24396	1047	3738	1307	607	1071	474	307	12157		73284	94841	196236	3873	30524		471	207	245	249	1086	534
	45915		86013		22677	8259	9998	357	1479	915	1582	3422	909	1488		47985	18324	71482	8962	4825		501	166	129	528	302	951
	9307		2988		38323	5836	1252	178	850	683	1350	814	12559	623		31459	72610	19813		2046		487	175	614	110	5040	629
	10653		25842		9595	7187	7766	283	804	1098	1664	4395	9750	845		13458	12933	4212		117254		3085	108	191	166	586	697
	9777		1207		1351		6748	186	883	2617	1016	2397	1878	358		11114	2660	21059		2667		622	366	244	883	855	364
	5444				15408		30938	314	643	927	1128	1946	173	447		63390	29526	18062		1079		1472	164	206	559	822	2270
	46154				23154		2804	315	694	1589	322	450	1576	857		16543	15365	15562		24992		596	161	240	252	1100	34850
	4851				23604		23320	626	941	807	258	29582	152	1266		55327	5062	10672		1073		1011	1760	112	177	488	707
	39371				11936		4466	152	12181	3364	121	543	2776	349		92561	7984	145100		5185		893	938	532	2061	813	587
	25963				16037		5383	905	797	166	2227	546	304	2827		132826	30496	160582		1957		13920	8238	319	223	1140	612
	6423				11671		58100	145	2081	295	1405	946	1780	543		19194	172457	1822		3733		586	1953	317	118	480	1642
	25630				8979		19364	7601	986	101	574	415	5969	2083		79473	39767	70794		25144		565	187	415	200	1303	1419
	2235				5607		127009	8765	1803	185	237	1120	562	340			67256	23533		5921		833	2513	403	287	527	316
	18823				569		2135	421	784	261	791	5231	1034	10752			1155	13427		7811		1163	1145	346	193		332
	26850				3109		3279	1402	1437	501	305	14837	314	415			58822	15063				2677	2529	281	7854	1014	2203
	9040				11944		1531	211	1280	958	212	320	563	1727			9180	237056				13317	740	1269	4997	816	640
	3912				1654		34309	1207	3671	144	329	2585	853	753			49490	76623				357	901	349	208	889	639
	2644				3744		8808	11778	9208	124	965	454	5068	325			69941	118012				377	1160	152	9310	1397	381
	989				678		3008	190	567	262	290	629	11304	1109			13929	74797				1284	569	164	1478	1202	829
	11931				50989		442	975	524	147	3803	4260	2155	734			162061	109287				1484	1286	565	229	1184	3357
	3119				10224		1933	999	1538	228	6034	1813	2446	821			2584	3282				2103	755	1712	1231	447	497
	6574				17005		24194	1010	841	2513	588	319	745	1385			7141	341603				393	355	163	644	312	460
	41479				5420		566	2950	11022	127	847	3231	646	352			27731	109324				729	321	4273	935	2832	664
	40833				49399		6014	502	1454	214	2016	1915	873	1703			12533	2665				1109	1254	305	286	484	338
	6112				9203		2350	330	1516	226	981	12429	2368	549			2535	47866				1550	326	125	192	557	325
	1765				99752		12387	299	520	685	567	1225	1871	414			1119	28845				10093	1273	162	344	395	2092
	6708				3390		47868	372	1055	254	863	10982	366	5667			111660	11945				703	518	149	628	8321	1169
	19240				66218		18325	131	768	322	650	8026	584	1850			25604	920				2193	753	384	740	1770	1016
	60514				73923		16842	1398	2361	1440	2467	1973	1291	3423			27520	12334				587	685	1130	1583	690	1677
	128895				10284		40964	1375	658	164	1731	332	1012	534								324	727	472	276	428	478
	7274				36881		1399	2635	4074	1150	764	965	567	2678								9491	452	1145	1241	446	280
	8398				25773		1112	7059	750	165	715	12420	2536	703								877	1209	188	138	780	205
	9121				37234		2663	4785	1598	343	3109	1472	693	886								371	467	588	957	1111	144
	49632				35459		4845	1012	6219	248	605	648	1909	335								780	1138	1485	172	404	102
	46728				49915		27872	370	1432	100	6843	460	300	893								1634	336	114	429	778	503
	31579				30916		6907	346		411	513	515	1275	418								1058	1231	595	220	390	178
					15045			2050		236	3048	3294	282	397								305	767	536	349	1980	693
					10248			200		675	557	695	139	382								4068	1245	767	733	411	345
					7486			1118		1722	2041	702	987	510								886	1008	912	11313	575	1084
					1802			488		614	1515	1545	269	3886								744	684	2197	1942	377	109
					3583			163		680	759	894	839	331								683	508	273	365	3259	221
								191		410	1011	1346	293	778								465	2086	662	102	373	271
								520		445	425	1099	111	861								1193	877	3391	363	393	101
								553		123	467	340	187	472								3307	350	785	1288	497	60845
								3625		211	519	2518	597	2605								916	853	4003	244	1165	173
								182		307	700	883	393	939								673	692	5850	350	433	453
								409		514	5472	1098	577	538								2937	102	1495	321	383	1110
								570		1686	306	838	731	1267								630	123	429	353	316	578
								197		150	2835	832	1492	481								812	128	347	384	608	633
								777		302	372	1401	2425	800								464	145	4443	100	351	657
								189		135	1825	2348	354	640								784	286	734	6182	1062	258
								463		176	2157	590	343	422								10108	111	939	332	718	4443
								2138		171	963	2083	1868	462								331	142	7164	145	1652	110
								22345		532	756	4435	6193	1425								559	332	1259	106	33167	1598
								650		132	320	1305	769	576								401	344	102	3662	2133	154
								1659		227	633	513	117	451								1576	353	220	111	1130	4587
								222		182	1122	605	105	395								1618	532	1337	637	13668	434
								344		515	571	1906	239	1759								640	681	1403	469	8292	3892
								134		117	5381	372	382	36536								1554	1004	647	2623	1503	266
								236		2058	2584	417	1364	413								9309	356	343	1118	2875	1484
								11557		222	461	846	467	511								334	405	5090	2676	1159	486
								185		1764	983	2007	554	587								306	553	351	737	1447	358
								945		1195	668	350	629	353								1541	497	146	406	1667	1177
								776		209	597	1279	963	328								402	2722	823	615	1908	224
								305		1210	2505	1340	427	3178								423	341	5574	186	2271	212
								1356		196	816	615	549	584								478	2642	986	297	2063	819
								265			1647	2479	329	915								872	1117	963	1495	1666	190
								392			3892	401	1386	308								383	1516	423	445	4056	2843
								132			6872	1149	1750	5860								825	288	159	1024	5708	1777
								931			2801	889	439	1260								611	136	436	458	8042	1595
								262			2974	1824	433	626								425	101	391	336	8785	185
								801			2875	753	603	2518								513	106	1165	2319	4045	2210
								904			1479	11366	2662	1646								1899	177	179	702	1821	6785
								1116				1216	995	363								540	205	563	210	1178	370
								1216				6522	520	383								469	227	730	231	5691	162
								478				542	515	366								875	243	582	849	418	4844
								1953				9238	1086	360								3574	505	236	488	4047	442
								836				5062	2472	330								3639	281	2038	108	566	177
								4598				311	717	339								1964	150	481	199	5962	135
								1450				1233	5729	2940								735	109	523	189	4921	172
								547				705	2490	488								1409	621	15706	274	595	349
								335				826	4774	345								503	105	215	262	631	586
								927				316	20225	12119								404	194	689	153	2590	435
								959				1226	1517	2893								492	126	288		382	141
								652				5159	1822	735								547	883	186		542	666
								417				3409	8220	1730								740	181	654		759	450
								242				4261	1599	11639								403	115	452		1039	871
								396				626	1376	1042								576	241	967		507	532
								779				631	1663	2486								340	135	2625		337	451
								285				274	5830	2482								358	120	139		880	3032
								1061				12981	2783	463								2126	141	1592		1999	555
								534				4303	2105	337								4513	176	739		1173	342
								766				4387	36651	702								665	143	919		327	300
								308				4032	2822	354								773	5003	1271		540	348
								326				2253	2158	4554								1605	580	196		598	1029
								254				7393	1428	4930								761	305	828		434	565
								2019				1874	4733	460								1894	524	253		2432	605
								195				1997	1088	3420								18033	359	115		533	423
								279				312	2050	424								439	5259	229		2189	373
								518				342	1292	389								7381	2185	255		2187	2411
								366				691	3474	671								309	1221	696		1385	883
								1371				1521	1080	10218								749	1383	135		11092	616
								4621				639	309	393								477	732	7309		1325	844
								342				744	316	1062								1411	1915	1390		3660	592
								2235				755	556	718								6161	5938	131		622	317
								431				1965	1271	1926								421	832	2505		1279	469
								883				4445	106	551								376	2474	377			600
								1048				683	1126	492								1601	3941	10560			1056
								1129				567		537								9745	516	142			395
								803				466		1389								5741	6190	237			735
								574				815		350								562	451	413			595
								290				1412		3982								1867	416	425			2831
								1650				622		769								10320	4104	338			800
								351				345		1898								836	3371	227			421
								3033				511		957								13212	7523	431			312
								642				457		1537								426	482	1283			392
								371				2248		2423								2385	645	310			387
								25092				421		406								4408	1203	5992			339
								7936				8007		3066								379	671	223			402
								1143				507		568								1267	1791	465			744
								1585				913		46704								2479	830	316			369
								1807				669		1545								3630	373	1038			583
								3587				743		691								996	1139	170			138
								1130				1432		1114								879	2099	580			100
								608				3845		529								1104	129	494			360
								5869				2113		506								1240	314	4508			255
								568				1811		394								8892	138	3389			236
								895				964		1288								1372	198	562			193
								4698				4706		5345								3944	246	119			1231
								634				3085		1378								5067	148	712			232
								529				1941		1367								1602	296	154			106
								835				1002		1405								2330	151	184
								611				2584		2995								538	122	211
								1833				370		470								928	1379	235
								1342				857		1512								5532	114	192
								581				263		695								1279	512	294
								587				3376		862								663	891	185
								939				215		503								896	583	120
								1657				322		338								2961	1044	264
								522				227		1000								11404	485	156
								857				1989		4434								1024	1725	1953
								1764				111		1149								797	400	127
								1881				601		1332								851	871	174
								1126				412		2871								700	343	327
								1943				386		469								760	594	108
								3133				429		601								631	5156	698
								2343				6175		3923								3489	1421	711
								506				154		971								1764	318	401
								749				241		475								809	695	213
								446				220		3650								769	704	246
								1077				794		1344								1227	717	2636
								3031				2856		979								2832	2458	320
								1123				1244		307								1186	433	1809
								486				7921		783								595	417	6813
								333				580		392								520	1297	414
								2115				600		3964								634	1865	181
								1396				718		3344								573	1767	795
								1797				445		1052								1256	110	165
								2511				3666		3444								517	163	136
								416				1366		818								865	162	216
								4189				719		1225								956	295	132
								5700				1899		1077								509	146	116
								1349				2170		1131								1333	340	331
								734				508		370								1179	172	368
								524				930		684								10990	300	1348
								1117				362		531								1788	544	203
								380				643		1417								988	761	204
								1163				357		607								1725	118	1013
								411				2353		858								2099	242	8818
								418				326										2076	140	473
								374				1886										516	100	1307
								10967				1199										704	190	198
								767				668										5155	876	187
								543				810										1079	159	410
								1288				497										7771	130	339
								390				582										660	510	542
								1158				394										919	394	109
								630				909										985	1428	160
								4759				714										1028	381	324
								1668				603										861	259	441
								1006				351										4390	113	503
								3173				3079										3242	945	593
								789				434										4850	378	337
								585				825										963	406	435
								363				4164										2396	204	374
								329				824										4342	601	449
								480				335										698	396	1358
								5129				1068										662	248	900
								713				544										716	282	656
								760				1781										1143	1457	219
								1030				942										536	409
								1301				12731										1476	3325
								3024				381										2598	195
								710				1433										1015	137
								659				6183										654
								2746				960										1370
								762				2365										821
								588				866										1394
								3576														1718
								657														2023
								1233														730
								4425														3004
								732														1337
								1463														1274
								921														1128
								1931														641
								1927														3324
								2200														1127
								1579														1113
								3008														579
								826														1094
								541														702
								1193														986
								1544														2605
								958														577
								995														554
								837														502
								697														1420
								1271														1184
								653														549
								686
								616
								988
								815
								2563
								968
								591
								628
								2613
								602
								1024
								4546
								514
								2948
								4899
								1482
								932
								614
								714
								709
								914
								1609
								1835
								600
								504
								1511
								677
								609
								2972
								4413
								6386
								3158
								683
								544
								620
								992
								759
								1343
								718
								7162
								893
								1316
