# Supplementary material for: Coordination between ECM and cell-cell adhesion regulates the development of islet aggregation, architecture, and functional maturation
Source: eLife. 2023 Aug 23;12:e90006. doi: 10.7554/eLife.90006 (PMC10482429; doi:10.7554/eLife.90006)
Supplement: Figure 1—figure supplement 1—source data 5. [file elife-90006-fig1-figsupp1-data5.xlsx]

## Sheet: Suppl 1-1J
Average Islet Size
Control (n = 7)			Mutant (n = 6)
	ChrA Area (um^2)			ChrA Area (um^2)
1	2368.07		1	6474.52
2	8596.07		2	20051.4
3	7110.59		3	62059.9
4	15035.8		4	29796.3
5	1729.72		5	5239.47
6	19902.3		6	1118.18
7	14908.4		7	33861.2
8	13370.1		8	2774.11
9	19719.5		9	21093.1
10	6841.61		10	1809.7
11	6113.81		11	30513.6
12	2421.24		12	5269.77
13	13781.1		13	14726.8
14	10246.9		14	11628.2
15	3123.89		15	2838.84
16	5100.75		16	10200.5
17	5937.79		17	4204.15
18	6070.12		18	2476.28
19	2845.64		19	19311.6
20	5914.29		20	3104.11
21	8696.24		21	56537.6
22	18647.3		22	22116.9
23	3543.75		23	21665.1
24	4055.13		24	941.95
25	9498.65		25	15105
26	9463.82		26	9890.48
27	1918.32		27	6484.2
28	2195.75		28	2773.91
29	2015.2		29	2290.77
30	1122.1		30	13065.7
31	9513.08		31	3409.78
32	999.869		32	11403.8
33	8114.99		33	19078.3
34	5351.39		34	27377.6
35	1323.88		35	3956.19
36	5282.75		36	16380.7
37	460.669		37	8811.87
38	3879.72		38	18016
39	5534.22		39	1801.87
40	1863.29		40	975.135
41	806.326		41	7182.52
42	544.971		42	4321.43
43	203.849		43	413.881
44	2459.17		44	1557.83
45	642.876		45	18009.6
46	1355.01		46	627.005
47	8549.49		47	10916.1
48	8416.33		48	9882.44
49	1259.78		49	8890.4
50	363.795		50	4305.15
51	1382.63		51	5792.07
52	3965.67		52	2787.93
53	12472.9		53	1482.59
54	26567.3		54	24034
55	1499.29		55	2430.73
56	1730.96		56	5435.9
57	1879.98		57	6903.85
58	10230		58	1321.62
59	9631.39		59	20180.6
60	6508.94		60	1276.48
61	7226.84		61	19548.2
62	14347.5		62	3776.87
63	56304.3		63	14966.1
64	11927.9		64	2665.7
65	12791.4		65	548.269
66	12568.8		66	6085.78
67	5515.25		67	3166.97
68	11651.5		68	1043.36
69	2220.9		69	1645.63
70	1556.38		70	6285.71
71	34123.7		71	35546.2
72	20078.8		72	8196.61
73	1434.15		73	13862.5
74	9532.66		74	238.064
75	9336.02		75	12124.2
76	4426.34		76	1892.14
77	156758		77	10200.7
78	1859.58		78	14416
79	5055.61		79	2870.99
80	532.192		80	33403.4
81	39059		81	532.604
82	6301.79		82	1471.87
83	29696		83	5715.8
84	1582.97		84	2583.25
85	6063.73		85	522.504
86	34044		86	230.644
87	1205.57		87	23014.9
88	4440.98		88	5277.39
89	26409		89	5672.31
90	14809.2		90	1820.42
91	24300		91	33519.2
92	7168.3		92	13023.2
93	4784.57		93	12149.5
94	36744.3		94	913.506
95	3618.57		95	54412.4
96	2696		96	1545.25
97	11299.7		97	9748.05
98	11489.5		98	690.901
99	11337.2		99	8203.83
100	17728.7		100	1830.72
101	615.875		101	460.051
102	5326.45		102	2789.99
103	248.782		103	2344.98
104	4114.49		104	10027.8
105	5468.26		105	5716.42
106	3032.59		106	1726.84
107	14225.7		107	14940.9
108	15452.1		108	3243.24
109	2471.12		109	8988.72
110	10659.1		110	3893.53
111	22321.1		111	8105.92
112	5722.81		112	847.137
113	1602.55		113	2363.33
114	5871.01		114	40447.4
115	1943.67		115	14733.6
116	18928.7		116	4083.78
117	7109.77		117	868.161
118	533.222		118	4340.6
119	5189.59		119	3722.87
120	1277.51		120	3207.58
121	10548		121	2199.67
122	1048.72		122	29907.4
123	8964.19		123	33098.5
124	1884.52		124	375.543
125	231.674		125	14591.8
126	662.045		126	4850.53
127	3692.16		127	2767.52
128	676.473		128	3104.72
129	629.272		129	48861
130	5969.74		130	15793.2
131	558.78		131	24324.2
132	13931		132	15416.9
133	1576.58		133	22525.8
134	254.347		134	676.473
135	700.382		135	70409.8
136	13534		136	22533.4
137	482.311		137	549.299
138	3303.42		138	9865.95
139	1356.86		139	5945.42
140	14896.6		140	2462.06
141	11851.5		141	189.627
142	4735.31		142	2542.24
143	7053.29		143	11287.1
144	412.026		144	9206.58
145	1435.8		145	14794.4
146	4626.27		146	8822.18
147	4674.09		147	16512.6
148	7898.98		148	2475.04
149	1977.68		149	3208.4
150	278.463		150	51521.4
151	3175.84		151	5455.68
152	4772.41		152	28104.7
153	4865.16		153	560.223
154	2460.2		154	9516.79
155	3305.48		155	2710.43
156	2405.58		156	3191.71
157	1850.72		157	215.597
158	1155.69		158	961.531
159	117.28		159	20530.2
160	640.815		160	10437.9
161	2461.85		161	17189.2
162	340.916		162	2471.12
163	771.698		163	902.788
164	139.747		164	16094.2
165	10509.6		165	3165.53
166	2107.33		166	4312.98
167	3505		167	798.287
168	1117.15		168	1847.21
169	10181.9		169	1216.5
170	1896.89		170	74644.7
171	20560.5		171	2191.01
172	698.733		172	270.836
173	13648.6		173	4423.25
174	15236.7		174	232.705
175	2119.7		175	2723.41
176	7601.76		176	271.867
177	5312.23		177	14033
178	7674.52		178	70.6978
179	7308.67		179	9707.44
180	10288.3		180	14859.9
181	6372.28		181	7765.21
182	3101.01		182	157.679
183	2112.28		183	7014.54
184	1542.98		184	1522.58
185	371.421		185	42287.6
186	738.514		186	6851.91
187	8930.39		187	3038.97
188	5929.34		188	487.258
189	21467		189	15478.1
190	2410.73		190	95.4317
191	2252.85		191	1537.83
192	1240.2		192	10863.1
193	2846.05		193	6291.48
194	2211.62		194	994.51
195	10580.4		195	421.713
196	29858.6		196	24167.9
197	1319.14		197	549.711
198	1211.14		198	222.399
199	270.424		199	5151.25
200	169.221		200	221.162
201	770.462		201	1068.71
202	2627.16		202	403.369
203	380.49		203	769.431
204	52.3535		204	5182.58
205	15193.8		205	1220.41
206	7436.46		206	1609.97
207	8578.75		207	2472.16
208	11244.9		208	184.474
209	35427		209	3609.5
210	22757.7		210	1959.34
211	5028.41		211	1521.75
212	1702.31		212	2912.01
213	1202.89		213	42546.9
214	1481.36		214	2319.84
215	3554.26		215	2062.6
216	7146.66		216	8538.97
217	1276.27		217	31469.6
218	373.894		218	16273.3
219	2076.62		219	2782.36
220	1155.07		220	11401.1
221	218.483		221	14656.9
222	4725		222	27900.5
223	5737.44		223	6916.64
224	11570.3		224	1215.26
225	1924.71
226	5866.06
227	38010.1
228	981.524
229	2471.54
230	348.13
231	457.165
232	4353.17
233	16674.4
234	25150.3
235	919.484
236	244.66
237	896.192
238	658.541
239	215.804
240	2060.75
241	258.057
242	1600.7
243	1390.87
244	6376.82
245	577.949
246	4806.62
247	920.514
248	1109.52
249	11975.3
250	3991.23
251	26178.6
252	440.058
253	675.854
254	315.564
255	7071.63
256	1815.47
257	619.997
258	91.1033
259	398.422
260	4986.77
261	116.662
262	1239.58
263	484.373
264	2553.16
265	9866.36
266	3777.08
267	3471.41
268	8443.34
269	288.356
270	229.201
271	548.887
272	998.632
273	5744.86
274	1423.64
