# Supplementary material for: Coordination between ECM and cell-cell adhesion regulates the development of islet aggregation, architecture, and functional maturation
Source: eLife. 2023 Aug 23;12:e90006. doi: 10.7554/eLife.90006 (PMC10482429; doi:10.7554/eLife.90006)
Supplement: Figure 1—figure supplement 1—source data 6. [file elife-90006-fig1-figsupp1-data6.xlsx]

## Sheet: Suppl 1-1K
Islet Size Distribution
Control (n = 7)											Mutant (n = 6)
um2 x1000	T1	T2	T3	T4	T5	T6	T7				um2 x1000	T1	T2	T3	T4	T5	T6
<20	290	43	56	26	64	17	8				<20	299	35	31	21	22	19
20 to 40	5	8	7	2	2	3	0				20 to 40	24	5	7	4	1	3
>40	0	2	5	0	0	0	0				>40	11	1	4	3	2	1
total	295	53	68	28	66	20	8	Total:	538		total	334	41	42	28	25	23	Total:	493
Frequency	T1	T2	T3	T4	T5	T6	T7	Average			Frequency	T1	T2	T3	T4	T5	T6	Average
<20	0.98	0.81	0.82	0.93	0.97	0.85	1	0.89			<20	0.9	0.85	0.74	0.75	0.88	0.83	0.82
20 to 40	0.02	0.15	0.1	0.07	0.03	0.15	0	0.09			20 to 40	0.07	0.12	0.17	0.14	0.04	0.13	0.11
>40	0	0.04	0.07	0	0	0	0	0.03			>40	0.03	0.02	0.1	0.11	0.08	0.04	0.06
total	1	1	1	1	1	1	1				total	1	1	1	1	1	1
											Islet Size	T1	T2	T3	T4	ytc042_duct-bv	ytc044_duct-bv
	T1	T2	T3	T3	T5	T6	T7				um2 x1000	0.0663694	1.15178	0.0803852	0.463143	0.202158	0.381701
	0.0840953	1.20434	0.453455	0.399247	0.176923	0.626591	0.144373					0.101875	1.24309	0.136037	0.573621	0.287564	0.556078
	0.105967	1.25896	0.558368	0.585782	0.192728	0.861928	0.203882					0.116495	1.77363	0.671938	0.904437	0.298344	0.599817
	0.107418	1.25978	0.574033	0.725322	0.22449	0.92809	0.334352					0.124117	2.20833	2.12114	1.13467	0.334146	1.46401
	0.115404	1.87091	0.598355	0.957821	0.22602	1.17954	1.98247					0.125341	2.28995	2.24811	1.28039	0.337965	2.14595
	0.12302	2.28748	0.733155	1.13838	0.308768	1.29452	2.8628					0.148718	2.3489	2.54594	1.91605	0.62869	2.32947
	0.156028	2.3693	0.804883	1.43807	0.378568	1.29805	3.05907					0.158555	2.38353	2.55316	2.39053	0.706417	2.50845
	0.168513	2.44165	0.946897	2.04591	0.406239	1.44046	3.3148					0.193313	2.41918	2.76257	2.60118	1.0159	2.67011
	0.168809	2.77844	1.01718	2.16195	0.420994	2.34673	7.88552					0.201971	2.59582	2.82667	2.91881	1.27649	2.75726
	0.174349	2.92437	1.36943	2.19493	0.448187	2.53506						0.202242	2.59727	3.06824	3.06309	1.42361	3.22916
	0.191282	3.81583	1.45188	2.28253	0.527034	2.56741						0.203621	3.36237	3.33022	3.13358	1.50644	3.79672
	0.195315	3.87993	1.48527	2.30664	0.565539	5.07758						0.207023	3.67113	3.46955	6.08702	1.81057	3.807
	0.206444	4.13695	1.6984	2.53873	0.573889	6.4556						0.208947	4.2969	4.28824	6.59571	2.10178	6.82529
	0.213486	4.15221	1.78311	2.60386	0.588073	6.87234						0.225956	4.30803	4.33132	7.46161	2.33683	7.70005
	0.233117	4.20559	1.793	2.60469	0.676821	7.73868						0.240796	4.39295	5.95449	8.14426	2.48227	8.29355
	0.2523	5.21432	1.80063	3.04907	0.700474	8.4449						0.265775	4.45396	7.05762	8.34811	2.67627	8.37906
	0.25311	5.36623	1.82165	3.49202	0.806256	9.23792						0.27426	4.54713	7.93485	8.50332	2.86119	10.2297
	0.258094	6.59035	2.65065	6.89932	0.901558	9.83131						0.274805	5.25802	9.23029	13.2739	3.85503	13.846
	0.262048	6.66847	2.85058	7.09369	0.915517	23.3722						0.278811	5.39467	9.45681	13.8263	6.8823	17.6785
	0.279878	6.67239	2.97219	8.16838	1.08594	30.0685						0.280485	5.47135	9.5813	16.5084	7.14417	24.1572
	0.281348	7.1883	3.06577	8.50661	1.11686	32.4762						0.286856	6.74556	9.96798	17.2193	11.412	29.1519
	0.283596	7.21056	3.15564	8.83145	1.30913							0.323171	6.8111	10.0908	22.1022	13.6873	31.0708
	0.294823	8.92194	3.16017	8.83248	1.38683							0.333072	8.71623	10.6449	22.97	27.1164	76.7036
	0.296876	9.28759	3.28425	9.63283	1.44588							0.35421	8.78198	11.1154	24.6544	60.5952
	0.298645	9.65468	3.38401	11.2902	1.52591							0.354717	8.99573	11.3696	25.2366	77.7302
	0.306494	10.5008	3.67505	12.213	1.60239							0.360835	10.2883	11.6744	42.9228
	0.314132	11.4949	4.06749	15.7438	1.77877							0.371086	10.7541	13.5284	48.2412
	0.319274	11.5691	4.28391	22.6573	1.87922							0.381823	11.255	13.5558	77.4198
	0.319892	12.0446	4.32287	22.8894	1.92811							0.38234	12.6162	15.2314
	0.321392	0.0128435	0.00435544		2.07621							0.387475	13.0228	16.1789
	0.324014	0.0129276	0.00457392		2.11396							0.388012	13.6092	17.4712
	0.327569	0.0129789	0.00503603		2.12111							0.392703	16.4825	20.1006
	0.33061	0.0132335	0.00506118		2.52445							0.40774	18.0786	21.7426
	0.334583	0.0137574	0.0051764		2.77277							0.418018	18.6599	22.2865
	0.339942	0.0139151	0.00565067		2.80295							0.449594	19.8908	22.3997
	0.347718	0.0146429	0.00675195		3.19003							0.469886	22.5905	24.5101
	0.355347	0.01489	0.00682368		3.3746							0.470148	23.4488	30.8671
	0.361323	0.0159719	0.00686964		3.43072							0.484213	24.6886	32.7133
	0.363481	0.01605	0.0070906		4.45842							0.490268	26.3773	40.3519
	0.376339	0.0162914	0.00752736		4.68383							0.497531	35.4126	41.8514
	0.376368	0.0165416	0.00823454		4.76276							0.527677	103.487	68.318
	0.377462	0.0171524	0.00916165		4.9122							0.532255		79.6383
	0.39162	0.0183058	0.00981875		4.93359							0.532438
	0.394989	0.019211	0.0107465		4.97713							0.533247
	0.398786	0.0204527	0.0108116		6.0031							0.538473
	0.399238	0.0205753	0.0108502		6.50668							0.543528
	0.405247	0.0209797	0.0116728		6.6396							0.548681
	0.413469	0.0249759	0.0125009		7.98342							0.556631
	0.424345	0.0285943	0.0131312		8.16625							0.55773
	0.430073	0.0319721	0.0134891		8.17797							0.562163
	0.433256	0.0387418	0.0140365		8.756							0.563387
	0.465087	0.0390184	0.0146786		8.98552							0.574148
	0.4686	0.0636851	0.0156572		9.4831							0.589611
	0.475413	0.0652112	0.0159633		9.79459							0.596748
	0.483669		0.016515		10.0006							0.598685
	0.488066		0.0169613		10.9684							0.610933
	0.491381		0.0172074		11.5562							0.617572
	0.493442		0.0200161		11.6791							0.628035
	0.501068		0.0212978		12.3009							0.641706
	0.502717		0.0313152		13.1774							0.643338
	0.514493		0.0318977		14.2286							0.647593
	0.526764		0.0362331		15.0057							0.653463
	0.554282		0.0367225		16.2338							0.664203
	0.55737		0.0385095		16.4823							0.668761
	0.55775		0.0402351		19.118							0.669671
	0.560842		0.0408351		20.834							0.670651
	0.56373		0.0459039		21.3442							0.671526
	0.564008		0.109658									0.67638
	0.567281		0.147058									0.677492
	0.578319											0.680491
	0.580835											0.688638
	0.594642											0.691631
	0.60433											0.69306
	0.615075											0.693703
	0.622782											0.694253
	0.625974											0.694278
	0.626521											0.720169
	0.631539											0.73565
	0.641009											0.745109
	0.641639											0.75356
	0.641725											0.776882
	0.647212											0.78677
	0.658745											0.800785
	0.659947											0.812509
	0.672557											0.818487
	0.675442											0.835845
	0.690489											0.885366
	0.697177											0.886327
	0.714161											0.919693
	0.724498											0.921396
	0.72862											0.937964
	0.753354											0.942314
	0.766752											0.946279
	0.768049											0.95445
	0.774676											0.968443
	0.777414											0.975868
	0.778706											0.988726
	0.799112											0.993685
	0.808792											0.998729
	0.810042											1.01815
	0.81086											1.03526
	0.828999											1.0383
	0.836449											1.08733
	0.867119											1.12127
	0.867748											1.12536
	0.874138											1.13704
	0.879506											1.21447
	0.880115											1.23031
	0.882176											1.24263
	0.882223											1.25834
	0.888808											1.29791
	0.900378											1.32265
	0.911259											1.33455
	0.924255											1.3347
	0.931438											1.4105
	0.959736											1.43704
	0.963891											1.44909
	0.965903											1.45044
	0.970451											1.50403
	0.994922											1.53656
	1.00381											1.53923
	1.0223											1.55894
	1.03821											1.59915
	1.05664											1.59987
	1.09453											1.60074
	1.13858											1.63295
	1.16888											1.65899
	1.17692											1.68062
	1.19227											1.71228
	1.20351											1.71575
	1.2062											1.72871
	1.21153											1.74268
	1.21765											1.75847
	1.22743											1.76456
	1.23623											1.77639
	1.23919											1.78455
	1.30584											1.78639
	1.30822											1.839
	1.31976											1.8874
	1.36501											1.93447
	1.37644											1.96264
	1.38675											2.00757
	1.41522											2.00924
	1.41858											2.01898
	1.42794											2.03695
	1.43849											2.06751
	1.48307											2.09104
	1.51008											2.09455
	1.51283											2.10404
	1.55535											2.18874
	1.61736											2.19823
	1.64707											2.20243
	1.65625											2.22771
	1.73859											2.24934
	1.74804											2.26371
	1.78455											2.29964
	1.79191											2.30158
	1.83361											2.36477
	1.85727											2.37149
	1.85896											2.38682
	1.94347											2.45793
	1.96339											2.46412
	1.98684											2.4668
	2.07092											2.49485
	2.08177											2.51038
	2.10047											2.51585
	2.15191											2.52774
	2.19019											2.55625
	2.2224											2.68975
	2.26249											2.69432
	2.30025											2.73957
	2.30108											2.74299
	2.30313											2.81335
	2.31502											2.8261
	2.34132											2.854
	2.40043											2.86469
	2.45997											2.93364
	2.47385											2.94298
	2.49565											3.00235
	2.54616											3.02637
	2.57877											3.11654
	2.60099											3.1362
	2.65182											3.16095
	2.70651											3.18175
	2.7412											3.25376
	2.75989											3.31903
	2.80804											3.38601
	2.87222											3.42565
	2.87223											3.52221
	2.91281											3.58456
	2.94993											3.61198
	2.9782											3.65212
	3.09049											3.73098
	3.20232											3.91711
	3.2115											3.92263
	3.2487											3.93207
	3.32167											4.00963
	3.44309											4.03532
	3.46625											4.04737
	3.52125											4.08584
	3.5603											4.10173
	3.58623											4.11449
	3.60367											4.11882
	3.63703											4.11985
	3.63868											4.12335
	3.67268											4.12521
	3.7986											4.1407
	3.83541											4.16719
	3.86604											4.17141
	3.88529											4.18968
	3.89716											4.29956
	3.9834											4.33455
	4.17285											4.33874
	4.17797											4.42115
	4.19302											4.42579
	4.19566											4.45759
	4.21031											4.46255
	4.22885											4.51147
	4.36897											4.65704
	4.48797											4.72171
	4.54755											4.78333
	4.60133											4.79151
	4.70242											4.81568
	4.91958											4.94572
	4.93981											4.95544
	4.95184											5.00132
	5.29746											5.05499
	5.3099											5.6567
	5.60852											5.75549
	5.72186											5.80752
	5.82607											5.81268
	5.95333											5.92318
	5.98202											6.36445
	6.05528											6.37191
	6.05555											6.401
	6.14826											6.54105
	6.15091											6.56562
	6.18348											6.69895
	6.18735											6.70805
	6.27205											7.14759
	6.90923											7.17648
	6.91055											7.2132
	7.91692											7.21787
	7.93517											7.35137
	7.97402											7.41611
	7.99339											7.55548
	8.06094											7.61967
	8.35193											7.65916
	8.70618											7.66836
	8.73212											7.67529
	8.81479											7.70668
	8.99693											7.7247
	9.09496											7.86064
	9.1865											8.00693
	9.25609											8.24011
	9.26861											8.51939
	9.32675											8.87395
	9.35676											9.12579
	9.41187											9.20658
	9.45524											9.21478
	9.46143											9.26842
	9.5137											9.38256
	9.9956											9.60986
	10.1005											9.67691
	10.3584											9.73975
	10.379											9.75669
	11.1755											10.3563
	11.283											10.5636
	11.3236											10.8196
	11.6596											10.9754
	11.9084											11.3169
	12.0258											11.3617
	12.4698											11.636
	12.5168											12.1493
	12.6385											12.1706
	12.8231											12.3923
	13.4732											12.5803
	14.3496											12.6245
	14.8803											12.7213
	14.8969											12.8506
	15.3702											13.1946
	16.4749											13.3522
	16.4784											13.615
	16.4966											13.8644
	16.8123											13.9266
	17.8153											14.6528
	18.9942											15.2432
	19.1685											15.2916
	19.2626											15.3987
	19.6999											15.4699
	19.9257											15.6661
	20.881											15.8454
	20.9038											16.291
	20.9502											18.2709
	21.7101											19.1465
	28.3502											19.3168
												19.4637
												19.5119
												19.8607
												20.3241
												20.9648
												21.055
												21.1287
												21.994
												22.2899
												22.8885
												23.369
												24.6133
												27.8161
												28.6286
												30.224
												31.3477
												31.6438
												32.1044
												32.541
												32.9492
												33.3118
												34.3518
												35.7079
												37.6107
												39.0549
												39.1758
												39.2797
												44.2178
												52.6385
												60.2096
												61.0705
												62.9821
												63.2128
												64.9676
												66.4816
												68.741
												70.164
												72.1447
