# Supplementary material for: Coordination between ECM and cell-cell adhesion regulates the development of islet aggregation, architecture, and functional maturation
Source: eLife. 2023 Aug 23;12:e90006. doi: 10.7554/eLife.90006 (PMC10482429; doi:10.7554/eLife.90006)
Supplement: Figure 1—figure supplement 1—source data 7. [file elife-90006-fig1-figsupp1-data7.xlsx]

## Sheet: Suppl 1-1O
Islet Blood vessel density
3 Months											8 weeks
	Islet	Number of BV per area				Islet	Number of BV per area					Islet	Number of BV per area					Islet	Number of BV per area
Control (n= 3)	Area(µm^2)	BV in islet	BV/area		Mutant (n= 3)	Area(µm^2)	BV in islet	BV/area			Control (n= 3)	Area(µm^2)	BV in islet	BV/area			Mutant (n= 3)	Area(µm^2)	BV in islet	BV/area
	18633.2	6	0.000322005			8125.47	0	0				1056.64	1	0.000946396				1038.3	0	0
	1279.74	0	0			312.156	0	0				123.02	0	0				4657.04	1	0.000214729
	15590.3	1	6.41423e-05			196.564	0	0				1617.36	1	0.000618292				641.706	0	0
	37329.6	7	0.000187519			9032.34	0	0				11175.5	6	0.000536891				1658.99	0	0
	6646.06	5	0.000752326			2287.77	0	0				191.282	0	0				323.171	0	0
	15807.8	7	0.000442818			2420.04	0	0				168.513	0	0				7675.29	1	0.000130288
	37709.5	17	0.000450815			865.762	0	0				2262.49	3	0.00132598				12170.6	2	0.000164331
	24040	19	0.00079035			479.33	0	0				1791.91	1	0.000558062				4425.79	0	0
	6970.66	3	0.000430375			12104	3	0.000247853				468.6	0	0				2036.95	0	0
	5820.14	4	0.000687268			4476.05	1	0.000223411				879.506	0	0				937.964	0	0
	1157.98	1	0.000863575			251.004	0	0				4547.55	4	0.000879595				2694.32	1	0.000371151
	2813.91	1	0.000355377			1097.54	0	0				8351.93	4	0.000478931				556.631	1	0.00179652
	417.775	0	0			16157.3	4	0.000247566				1656.25	0	0				497.531	0	0
	1555.68	1	0.000642804			7696.63	0	0				924.255	1	0.00108195				835.845	1	0.00119639
	4257.82	1	0.000234862			3883.05	0	0				615.075	0	0				533.247	0	0
	4933.13	5	0.00101356			856.678	0	0				1512.83	1	0.000661012				1712.28	0	0
	17671.8	15	0.000848808			432.765	0	0				377.462	0	0				34351.8	5	0.000145553
	33505.9	6	0.000179073			1512.49	0	0				564.008	0	0				786.77	1	0.00127102
	30088.2	17	0.000565005			343.69	1	0.0029096				2651.82	2	0.0007542				919.693	0	0
	1951.15	0	0			1410.03	0	0				3466.25	0	0				693.06	1	0.00144288
	2104.74	0	0			4041.99	1	0.000247403				882.223	0	0				7147.59	3	0.000419722
	26700.8	7	0.000262164			5762.62	0	0				1438.49	1	0.000695172				7351.37	0	0
	1595.37	1	0.000626814			2622.82	0	0				626.521	0	0				610.933	0	0
	5850.43	3	0.000512783			2217.26	0	0				777.414	0	0				4457.59	1	0.000224337
	776.536	0	0			50466.9	13	0.000257594				1192.27	1	0.000838738				19511.9	7	0.000358756
	468.55	0	0			667.794	0	0				3560.3	0	0				563.387	0	0
	199.39	0	0			3767.09	0	0				647.212	0	0				617.572	0	0
	374.6	0	0			1048.33	0	0				9995.6	5	0.00050022				988.726	0	0
	348.303	0	0			368.123	0	0				321.392	0	0				2301.58	1	0.000434484
	582.535	1	0.00171664			764.135	0	0				361.323	0	0				1934.47	0	0
	2773.07	2	0.000721222			611.178	1	0.00163618				105.967	0	0				12624.5	1	7.92109e-05
	1063.74	0	0			344.398	0	0				394.989	1	0.00253172				15845.4	0	0
	1501.1	0	0			20260	4	0.000197433				296.876	0	0				2864.69	1	0.000349078
	18036.4	10	0.000554434			2349.39	0	0				9256.09	5	0.000540185				1410.5	0	0
	2446.73	0	0			951.145	0	0				363.481	0	0				12850.6	0	0
	25498.2	17	0.000666712			12910	1	7.74593e-05				405.247	1	0.00246763				2188.74	0	0
	16230.2	11	0.000677751			11051.6	0	0				911.259	1	0.00109738				1776.39	1	0.000562939
	2444.51	1	0.000409079			973.234	1	0.0010275				900.378	1	0.00111064				598.685	0	0
	3139.24	1	0.000318549			1364.53	2	0.0014657				14349.6	6	0.000418129				15243.2	1	6.5603e-05
	8482.51	7	0.000825228			1204.44	3	0.00249078				1427.94	1	0.00070031				16291	1	6.13838e-05
	238.464	0	0			667.806	0	0				867.119	0	0				1242.62	0	0
	981.335	1	0.00101902			2670.15	0	0				554.282	1	0.00180414				2813.35	0	0
	25040.7	9	0.000359414			1328.03	0	0				6148.26	1	0.000162648				12392.3	0	0
						4434.88	0	0				604.33	0	0				2263.71	0	0
						1850.76	2	0.00108064				17815.3	3	0.000168395				3917.11	2	0.000510581
						17502.2	7	0.00039995				283.596	0	0				2689.75	0	0
						265.204	0	0				1022.3	1	0.000978184				1764.56	0	0
						8602.27	1	0.000116248				1227.43	0	0				968.443	0	0
						7565.16	1	0.000132185				959.736	0	0				2933.64	0	0
						39328.4	4	0.000101708				6187.35	4	0.000646481				5001.32	3	0.000599842
						905.156	0	0				2912.81	0	0				2227.71	0	0
						8545.08	0	0				488.066	0	0				203.621	0	0
						139042	13	9.34972e-05				3248.7	3	0.000923447				490.268	0	0
						4703.66	1	0.0002126				1510.08	0	0				921.396	0	0
						274.265	0	0				1365.01	0	0				30224	5	0.000165431
						6060.5	1	0.000165003				9461.43	5	0.000528461				4189.68	0	0
						587.339	0	0				3603.67	1	0.000277495				694.253	0	0
						40417.2	8	0.000197936				2222.4	1	0.000449964				2494.86	0	0
						15240.3	0	0				594.642	0	0				9609.86	2	0.00020812
						459.471	0	0				465.087	0	0				4945.72	0	0
						18957.5	7	0.000369247				3211.5	3	0.000934144				1599.15	1	0.000625332
						614.967	0	0				2459.97	0	0				208.947	0	0
						397.554	0	0				697.177	0	0				676.38	0	0
						356.414	0	0				10100.5	0	0				7213.2	0	0
						359.045	0	0				4228.85	2	0.000472941				4171.41	0	0
						3261.33	0	0				7935.17	3	0.000378064				407.74	0	0
						459.157	0	0				3202.32	0	0				3319.03	0	0
						299.402	0	0				2578.77	0	0				484.213	0	0
						934.687	0	0				399.238	0	0				2854	0	0
												1748.04	1	0.000572071				31347.7	5	0.000159501
												5608.52	4	0.000713201				1137.04	0	0
												4210.31	2	0.000475024				975.868	0	0
												659.947	0	0				557.73	0	0
												2741.2	1	0.000364803				381.823	0	0
												526.764	0	0				2527.74	0	0
												279.878	0	0				7555.48	3	0.000397063
												195.315	0	0				4167.19	0	0
												20950.2	21	0.00100238				688.638	0	0
												206.444	0	0				15398.7	4	0.000259762
												9094.96	10	0.00109951				735.65	0	0
												10379	5	0.000481744				274.26	0	0
												1986.84	0	0				124.117	0	0
												19925.7	8	0.000401492				274.805	0	0
												2872.22	0	0				13864.4	2	0.000144254
												11323.6	0	0				596.748	0	0
												5297.46	2	0.000377539				1035.26	0	0
												6909.23	4	0.000578936				4421.15	1	0.000226185
												398.786	0	0				7619.67	2	0.000262478
												6910.55	3	0.000434119				13352.2	1	7.48942e-05
												424.345	0	0				885.366	0	0
												12025.8	6	0.000498927				4047.37	0	0
												8732.12	5	0.000572598				2007.57	0	0
												4939.81	1	0.000202437				333.072	0	0
												7974.02	6	0.000752443				158.555	0	0
												298.645	0	0				800.785	1	0.00124877
												963.891	0	0				574.148	0	0
												21710.1	7	0.000322431				1539.23	0	0
												314.132	0	0				532.255	0	0
												376.339	0	0				32104.4	5	0.000155742
												514.493	0	0				371.086	0	0
												8060.94	7	0.000868385				202.242	0	0
												808.792	0	0				7217.87	2	0.00027709
												1217.65	0	0				7176.48	0	0
												578.319	0	0				3522.21	1	0.000283913
												3672.68	4	0.00108912				278.811	0	0
												2190.19	1	0.000456581				11636	0	0
												965.903	0	0				28628.6	3	0.00010479
												3321.67	0	0				201.971	0	0
												2808.04	0	0				1449.09	0	0
												641.009	0	0				589.611	0	0
												2100.47	0	0				3026.37	0	0
												8706.18	2	0.000229722				7659.16	1	0.000130563
												3090.49	1	0.000323573				668.761	0	0
												483.669	0	0				886.327	0	0
												3637.03	1	0.00027495				1018.15	1	0.000982169
												262.048	0	0				101.875	0	0
												970.451	1	0.00103045				470.148	0	0
												294.823	0	0				265.775	0	0
												641.725	0	0				538.473	0	0
												14896.9	8	0.000537024				19860.7	1	5.03508e-05
												16478.4	6	0.000364112				66481.6	5	7.52088e-05
												355.347	0	0				449.594	0	0
												15370.2	10	0.000650609				1839	0	0
												9356.76	4	0.000427499				469.886	0	0
												6272.05	3	0.000478312				4009.63	0	0
												6055.55	1	0.000165138				286.856	0	0
												557.37	0	0				9125.79	2	0.000219159
												5953.33	3	0.000503919				8006.93	0	0
												658.745	1	0.00151804				22888.5	3	0.00013107
												115.404	0	0				2104.04	0	0
												2070.92	2	0.000965754				2739.57	0	0
												156.028	0	0				387.475	0	0
												213.486	0	0				9382.56	1	0.000106581
												2473.86	2	0.000808455				44217.8	2	4.52306e-05
												107.418	0	0				13615	3	0.000220346
												2151.91	1	0.000464704				125.341	0	0
												430.073	0	0				392.703	0	0
												19262.6	16	0.000830625				3002.35	1	0.000333072
												1963.39	2	0.00101864				10975.4	1	9.1113e-05
												10358.4	6	0.000579239				32949.2	3	9.10493e-05
												1483.07	1	0.000674276				6541.05	3	0.000458642
												5721.86	4	0.000699073				1214.47	0	0
												1376.44	0	0				1558.94	0	0
												4951.84	5	0.00100972				562.163	0	0
												6183.48	2	0.000323443				2091.04	0	0
												3638.68	0	0				32541	2	6.14608e-05
												3798.6	1	0.000263255				954.45	0	0
												1778.77	0	0				1536.56	0	0
												2113.96	0	0				207.023	0	0
												3190.03	2	0.000626954				532.438	0	0
												9483.1	0	0				2942.98	0	0
												1879.22	0	0				942.314	0	0
												192.728	1	0.00518866				3181.75	0	0
												6639.6	5	0.000753058				3160.95	0	0
												915.517	1	0.00109228				670.651	0	0
												378.568	1	0.00264153				1334.55	0	0
												2524.45	1	0.000396126				4815.68	0	0
												20834	15	0.000719976				9739.75	1	0.000102672
												573.889	0	0				280.485	1	0.00356525
												13177.4	0	0				2202.43	0	0
												3430.72	1	0.000291484				15469.9	3	0.000193925
												6003.1	2	0.000333161				39279.7	3	7.63754e-05
												2121.11	0	0				2466.8	0	0
												6506.68	2	0.000307376				148.718	0	0
												1928.11	1	0.000518644				7416.11	0	0
												2772.77	1	0.00036065				2067.51	0	0
												3374.6	3	0.000888995				680.491	0	0
												527.034	0	0				4299.56	0	0
												420.994	0	0				1125.36	0	0
												4683.83	2	0.000427001				35707.9	5	0.000140025
												1445.88	1	0.000691618				7668.36	1	0.000130406
												1309.12	0	0				354.717	0	0
												16233.8	5	0.000307999				4791.51	0	0
												1386.83	0	0				388.012	0	0
												901.558	0	0				2018.98	0	0
												15005.7	9	0.000599774				1600.74	0	0
												12300.9	4	0.00032518				116.495	0	0
												176.923	1	0.00565218				20964.8	8	0.000381592
												806.256	0	0				527.677	0	0
												7983.42	4	0.000501038				677.492	0	0
												1116.86	0	0				6371.91	0	0
												4458.42	3	0.000672884				3730.98	2	0.000536052
												1085.94	1	0.000920864				6401	0	0
												11556.2	3	0.0002596				2826.1	0	0
												21344.2	1	4.6851e-05				1742.68	0	0
												448.187	0	0				193.313	0	0
												226.02	0	0				694.278	0	0
												16482.3	13	0.000788725				998.729	0	0
												406.239	0	0				693.703	0	0
												10968.4	2	0.000182342				240.796	0	0
												1525.91	0	0				691.631	0	0
												700.474	1	0.0014276				1087.33	0	0
												19118	11	0.000575373				776.882	0	0
												8166.25	1	0.000122455				3253.76	1	0.000307337
												8756	4	0.000456829				664.203	0	0
												8177.97	3	0.000366839				39175.8	9	0.000229734
												565.539	0	0				1715.75	0	0
												1602.39	1	0.000624069				24613.3	3	0.000121885
												10000.6	11	0.00109994				3611.98	0	0
												4762.76	4	0.000839849				18270.9	2	0.000109464
												9794.59	6	0.000612583				3652.12	0	0
												588.073	0	0				1786.39	0	0
												4912.2	3	0.000610724				63212.8	8	0.000126557
												2076.21	0	0				9756.69	1	0.000102494
												676.821	0	0				68741	7	0.000101831
												9237.92	0	0				360.835	0	0
												6872.34	1	0.000145511				7860.64	2	0.000254432
												23372.2	8	0.000342288				1632.95	0	0
												5077.58	3	0.000590832				653.463	0	0
												626.591	0	0				5923.18	0	0
												2346.73	0	0				19146.5	3	0.000156686
												2862.8	2	0.000698618				5755.49	5	0.000868735
												7885.52	5	0.000634074				27816.1	3	0.000107851
												144.373	0	0				9214.78	3	0.000325564
												3314.8	3	0.000905031				5656.7	3	0.000530344
												3059.07	0	0				10819.6	3	0.000277274
												1982.47	1	0.000504421				382.34	0	0
												334.352	0	0				10356.3	0	0
												203.882	0	0				225.956	0	0
												1179.54	1	0.000847787				13926.6	3	0.000215415
												1298.05	1	0.000770388				3386.01	0	0
												2535.06	1	0.000394467				64967.6	6	9.23538e-05
												1294.52	1	0.000772485				12149.3	0	0
												861.928	1	0.00116019				2861.19	0	0
												2567.41	1	0.000389498				77730.2	5	6.4325e-05
												5309.9	4	0.000753311				1506.44	0	0
												888.808	1	0.0011251				2482.27	0	0
												334.583	0	0				7144.17	0	0
												2978.2	1	0.000335773				337.965	0	0
												1211.53	1	0.0008254				1276.49	0	0
												810.042	0	0				60595.2	7	0.000115521
												475.413	0	0				1015.9	0	0
												714.161	0	0				334.146	0	0
												836.449	0	0				628.69	0	0
												11908.4	10	0.000839745				298.344	0	0
												2315.02	0	0				13687.3	0	0
												9455.24	6	0.000634568				1810.57	0	0
												3521.25	0	0				11412	0	0
												2600.99	3	0.00115341				27116.4	0	0
												7993.39	3	0.00037531				3855.03	1	0.000259401
												9268.61	7	0.000755237				2336.83	0	0
												2341.32	2	0.00085422				202.158	0	0
												1833.61	2	0.00109074				1423.61	0	0
												2546.16	2	0.000785495				6882.3	0	0
												1236.23	1	0.00080891				706.417	0	0
												1003.8	1	0.000996209				287.564	0	0
												2303.13	1	0.000434191				2676.27	0	0
												1206.2	1	0.000829046				2101.78	0	0
												1094.53	0	0				2670.11	0	0
												774.676	0	0				3796.72	0	0
												563.73	0	0				381.701	0	0
												174.349	0	0				556.078	0	0
												3897.16	3	0.000769791				1464.01	0	0
																		2757.26	0	0
																		3229.16	1	0.000309678
																		3807	0	0
																		76703.6	13	0.000169484
																		2329.47	0	0
																		8379.06	0	0
																		13846	0	0
																		8293.56	0	0
																		10229.7	1	9.77549e-05
																		2508.45	0	0
																		7700.05	0	0
																		24157.2	3	0.000124186
																		31070.8	4	0.000128738
																		6825.29	1	0.000146514
																		17678.5	2	0.000113132
																		2145.95	0	0
																		599.817	0	0
																		3922.63	0	0
																		2371.49	0	0
																		62982.1	3	4.76326e-05
																		1728.71	1	0.000578465
																		8873.95	1	0.000112689
																		2510.38	1	0.000398345
																		4101.73	0	0
																		2009.24	0	0
																		6708.05	0	0
																		72144.7	5	6.93052e-05
																		3116.54	2	0.000641738
																		1680.62	0	0
																		643.338	0	0
																		4462.55	0	0
																		11316.9	0	0
																		37610.7	4	0.000106353
																		9676.91	2	0.000206678
																		15291.6	7	0.000457767
																		10563.6	3	0.000283994
																		13194.6	1	7.57883e-05
																		354.21	0	0
																		647.593	0	0
																		4140.7	0	0
																		70164	8	0.000114019
																		19316.8	1	5.17683e-05
																		22289.9	5	0.000224317
																		31643.8	5	0.000158009
