# Supplementary material for: Coordination between ECM and cell-cell adhesion regulates the development of islet aggregation, architecture, and functional maturation
Source: eLife. 2023 Aug 23;12:e90006. doi: 10.7554/eLife.90006 (PMC10482429; doi:10.7554/eLife.90006)
Supplement: Figure 1—figure supplement 2—source data 1. [file elife-90006-fig1-figsupp2-data1.xlsx]

## Sheet: Suppl 1-2A
qPCR Validation for Control vs Ngn3-Cre; Itgb1 Mutant
Block Type	Fast 96-Well Block (0.1mL)
Calibration Background is expired	Yes
Calibration Background performed on	06-24-2021
Calibration Normalization FAM-ROX is expired	Yes
Calibration Normalization FAM-ROX performed on	06-24-2021
Calibration Normalization VIC-ROX is expired	Yes
Calibration Normalization VIC-ROX performed on	06-24-2021
Calibration Pure Dye FAM is expired	Yes
Calibration Pure Dye FAM performed on	06-24-2021
Calibration Pure Dye NED is expired	Yes
Calibration Pure Dye NED performed on	06-24-2021
Calibration Pure Dye ROX is expired	Yes
Calibration Pure Dye ROX performed on	06-24-2021
Calibration Pure Dye SYBR is expired	Yes
Calibration Pure Dye SYBR performed on	06-24-2021
Calibration Pure Dye TAMRA is expired	Yes
Calibration Pure Dye TAMRA performed on	06-24-2021
Calibration Pure Dye VIC is expired	Yes
Calibration Pure Dye VIC performed on	06-24-2021
Calibration ROI is expired	Yes
Calibration ROI performed on	06-24-2021
Calibration Uniformity is expired	Yes
Calibration Uniformity performed on	06-24-2021
Chemistry	SYBR_GREEN
Date Created	2023-03-03 09:44:10 AM PST
Experiment Barcode
Experiment Comment	Itgb1_KO vs WT
Experiment File Name	D:\Users\Public\Documents\Ben Shih qPCR\2023-03-03 094410.eds
Experiment Name	2023-03-03 094410
Experiment Run End Time	2023-03-03 13:33:46 PM PST
Experiment Type	Comparative Cт (ΔΔCт)
Instrument Name	278862712
Instrument Serial Number	278862712
Instrument Type	QuantStudio(TM) 6 Flex System
Passive Reference	ROX
Quantification Cycle Method	Ct
Signal Smoothing On	true
Stage/ Cycle where Analysis is performed	Stage 2, Step 3
User Name
Well Position	Sample Name	Target Name	Reporter	RQ Min	RQ Max	CT	Ct Mean	Ct SD	Delta Ct Mean	Delta Ct SE	Ct Threshold	Baseline Start	Baseline End		Control (n= 4)
A1	WT_Control	Itgb1	SYBR	0.644378	1.55189	34.7108	34.6936	0.383682	13.8621	0.259111	0.0588055	1	40			Itgb1	Slc2a2	Unc3	Mafa	MafB	Arx	Etv1	Aldhla3	Hk1	LdhA	Cyclio
A2	WT_Control	Slc2a2	SYBR	0.735009	1.36053	22.9904	22.9537	0.102263	2.12213	0.181521	0.192508	1	40		CT	34.7108	22.9904	22.3401	29.7735	25.7596	30.9579	27.8881	28.6399	29.202	27.7684	20.6806
A3	WT_Control	Unc3	SYBR	0.734256	1.36192	22.3401	22.2431	0.106472	1.41157	0.182125	0.197557	1	40			34.5313	23.0551	22.2916	29.5667	25.5229	30.9219	27.9797	28.4714	29.2772	27.8032	20.6731
A4	WT_Control	Mafa	SYBR	0.681063	1.46829	29.7735	29.4458	0.289489	8.6143	0.226465	0.237338	1	40			35.2159	22.9559	22.2468	29.3416	25.579	30.9158	27.872	28.2124	29.4795	27.8611	21.3525
A5	WT_Control	MafB	SYBR	0.718119	1.39253	25.7596	25.5481	0.176389	4.71662	0.195228	0.284783	1	40			34.3165	22.8132	22.094	29.1015	25.3312	30.5343	27.754	27.6903	28.7682	27.6943	20.62
A6	WT_Control	Arx	SYBR	0.711419	1.40564	30.9579	30.8325	0.199667	10.0009	0.200754	0.218403	1	40
A7	WT_Control	Etv1	SYBR	0.736618	1.35756	27.8881	27.8734	0.0926896	7.04192	0.180232	0.100737	1	40
A8	WT_Control	Aldhla3	SYBR	0.631771	1.58285	28.6399	28.2535	0.414611	7.42197	0.27076	0.237471	1	40		Delta CT	14.0302	2.30977	1.6595	9.09288	5.07895	10.2773	7.20747	7.95927	8.52137	7.08781
A9	WT_Control	Hk1	SYBR	0.677325	1.4764	29.202	29.1817	0.29954	8.3502	0.22971	0.282302	1	40			13.8582	2.38204	1.61848	8.89364	4.84979	10.2489	7.30662	7.79835	8.60415	7.13013
A10	WT_Control	LdhA	SYBR	0.739883	1.35157	27.7684	27.7818	0.0697096	6.95023	0.177624	0.225641	1	40			13.8634	1.60345	0.894304	7.98916	4.22648	9.5633	6.51954	6.85997	8.12701	6.50863
A11	WT_Control	Cyclio	SYBR			20.6806	20.8315	0.348342			0.101612	1	40			13.6965	2.19325	1.47402	8.48151	4.71126	9.9143	7.13404	7.0703	8.14827	7.07436
B1	WT_Control	Itgb1	SYBR	0.644378	1.55189	34.5313	34.6936	0.383682	13.8621	0.259111	0.0588055	1	40		Delta Ct Mean	13.8621	2.12213	1.41157	8.6143	4.71662	10.0009	7.04192	7.42197	8.3502	6.95023
B2	WT_Control	Slc2a2	SYBR	0.735009	1.36053	23.0551	22.9537	0.102263	2.12213	0.181521	0.192508	1	40
B3	WT_Control	Unc3	SYBR	0.734256	1.36192	22.2916	22.2431	0.106472	1.41157	0.182125	0.197557	1	40
B4	WT_Control	Mafa	SYBR	0.681063	1.46829	29.5667	29.4458	0.289489	8.6143	0.226465	0.237338	1	40		DeltaDelta CT	0.168118	0.18764	0.247922	0.478582	0.36233	0.276356	0.165548	0.537299	0.171172	0.137579
B5	WT_Control	MafB	SYBR	0.718119	1.39253	25.5229	25.5481	0.176389	4.71662	0.195228	0.284783	1	40			-0.00388145	0.259917	0.206905	0.279344	0.13317	0.247917	0.264706	0.376378	0.253949	0.179899
B6	WT_Control	Arx	SYBR	0.711419	1.40564	30.9219	30.8325	0.199667	10.0009	0.200754	0.218403	1	40			0.0013237	-0.518682	-0.51727	-0.625142	-0.490138	-0.437641	-0.522375	-0.562002	-0.223187	-0.441607
B7	WT_Control	Etv1	SYBR	0.736618	1.35756	27.9797	27.8734	0.0926896	7.04192	0.180232	0.100737	1	40			-0.16556	0.0711255	0.0624423	-0.132784	-0.00536251	-0.0866318	0.0921211	-0.351675	-0.201934	0.124128
B8	WT_Control	Aldhla3	SYBR	0.631771	1.58285	28.4714	28.2535	0.414611	7.42197	0.27076	0.237471	1	40
B9	WT_Control	Hk1	SYBR	0.677325	1.4764	29.2772	29.1817	0.29954	8.3502	0.22971	0.282302	1	40
B10	WT_Control	LdhA	SYBR	0.739883	1.35157	27.8032	27.7818	0.0697096	6.95023	0.177624	0.225641	1	40		RQ	0.890003	0.878041	0.842108	0.717683	0.777907	0.825674	0.89159	0.68906	0.888121	0.909043
B11	WT_Control	Cyclio	SYBR			20.6731	20.8315	0.348342			0.101612	1	40			1.00269	0.835136	0.866394	0.823966	0.911826	0.842111	0.832369	0.770369	0.838598	0.882765
C1	WT_Control	Itgb1	SYBR	0.644378	1.55189	35.2159	34.6936	0.383682	13.8621	0.259111	0.0588055	1	40			0.999083	1.43265	1.43124	1.54236	1.40458	1.35439	1.43632	1.47632	1.16731	1.35812
C2	WT_Control	Slc2a2	SYBR	0.735009	1.36053	22.9559	22.9537	0.102263	2.12213	0.181521	0.192508	1	40			1.1216	0.951895	0.957642	1.09641	1.00372	1.06189	0.938142	1.27604	1.15024	0.917558
C3	WT_Control	Unc3	SYBR	0.734256	1.36192	22.2468	22.2431	0.106472	1.41157	0.182125	0.197557	1	40			1.00335	1.02443	1.02435	1.0451	1.02451	1.02102	1.0246	1.05295	1.01107	1.01687
C4	WT_Control	Mafa	SYBR	0.681063	1.46829	29.3416	29.4458	0.289489	8.6143	0.226465	0.237338	1	40
C5	WT_Control	MafB	SYBR	0.718119	1.39253	25.579	25.5481	0.176389	4.71662	0.195228	0.284783	1	40
C6	WT_Control	Arx	SYBR	0.711419	1.40564	30.9158	30.8325	0.199667	10.0009	0.200754	0.218403	1	40
C7	WT_Control	Etv1	SYBR	0.736618	1.35756	27.872	27.8734	0.0926896	7.04192	0.180232	0.100737	1	40
C8	WT_Control	Aldhla3	SYBR	0.631771	1.58285	28.2124	28.2535	0.414611	7.42197	0.27076	0.237471	1	40		Mutant (n= 4)
C9	WT_Control	Hk1	SYBR	0.677325	1.4764	29.4795	29.1817	0.29954	8.3502	0.22971	0.282302	1	40
C10	WT_Control	LdhA	SYBR	0.739883	1.35157	27.8611	27.7818	0.0697096	6.95023	0.177624	0.225641	1	40		CT	37.5051	23.4991	23.7098	29.484	25.9937	32.4731	28.0204	27.8079	28.0859	26.2635	20.4746
C11	WT_Control	Cyclio	SYBR			21.3525	20.8315	0.348342			0.101612	1	40			37.7277	23.6429	23.9057	28.9834	25.8555	32.6931	28.0841	27.8632	28.2184	26.6331	20.4486
D1	WT_Control	Itgb1	SYBR	0.644378	1.55189	34.3165	34.6936	0.383682	13.8621	0.259111	0.0588055	1	40			37.7634	23.4408	23.2774	28.8375	25.911	32.6099	27.8066	27.8657	28.2669	26.4657	20.4453
D2	WT_Control	Slc2a2	SYBR	0.735009	1.36053	22.8132	22.9537	0.102263	2.12213	0.181521	0.192508	1	40			37.6825	23.1762	22.782	28.925	25.7271	32.2934	27.6921	27.8157	28.145	26.3462	20.2945
D3	WT_Control	Unc3	SYBR	0.734256	1.36192	22.094	22.2431	0.106472	1.41157	0.182125	0.197557	1	40
D4	WT_Control	Mafa	SYBR	0.681063	1.46829	29.1015	29.4458	0.289489	8.6143	0.226465	0.237338	1	40
D5	WT_Control	MafB	SYBR	0.718119	1.39253	25.3312	25.5481	0.176389	4.71662	0.195228	0.284783	1	40		Delta CT	17.0305	3.02446	3.23516	9.0094	5.5191	11.9985	7.54573	7.33323	7.61122	5.78891
D6	WT_Control	Arx	SYBR	0.711419	1.40564	30.5343	30.8325	0.199667	10.0009	0.200754	0.218403	1	40			17.2792	3.19434	3.4571	8.53481	5.40697	12.2445	7.63554	7.41458	7.76983	6.18458
D7	WT_Control	Etv1	SYBR	0.736618	1.35756	27.754	27.8734	0.0926896	7.04192	0.180232	0.100737	1	40			17.3181	2.99551	2.83206	8.39217	5.46569	12.1646	7.36132	7.42036	7.82163	6.02037
D8	WT_Control	Aldhla3	SYBR	0.631771	1.58285	27.6903	28.2535	0.414611	7.42197	0.27076	0.237471	1	40			17.388	2.8817	2.48758	8.63057	5.43261	11.9989	7.39767	7.52129	7.85053	6.05172
D9	WT_Control	Hk1	SYBR	0.677325	1.4764	28.7682	29.1817	0.29954	8.3502	0.22971	0.282302	1	40			17.2539	3.024	3.00297	8.64174	5.45609	12.1017	7.48507	7.42236	7.7633	6.01139
D10	WT_Control	LdhA	SYBR	0.739883	1.35157	27.6943	27.7818	0.0697096	6.95023	0.177624	0.225641	1	40
D11	WT_Control	Cyclio	SYBR			20.62	20.8315	0.348342			0.101612	1	40
E1	Itgb1_KO	Itgb1	SYBR	0.0845412	0.107357	37.5051	37.6697	0.114602	17.2539	0.070433	0.0588055	1	40		DeltaDelta CT	3.1684	0.902333	1.82359	0.395097	0.802482	1.99758	0.503809	-0.0887465	-0.738978	-1.16132
E2	Itgb1_KO	Slc2a2	SYBR	0.447253	0.640419	23.4991	23.4397	0.195173	3.024	0.105832	0.192508	1	40			3.41707	1.07221	2.04552	-0.0794911	0.690352	2.24361	0.593622	-0.00739241	-0.580367	-0.765657
E3	Itgb1_KO	Unc3	SYBR	0.216112	0.509569	23.7098	23.4187	0.499063	3.00297	0.25287	0.197557	1	40			3.45604	0.873385	1.42049	-0.222126	0.749066	2.16368	0.319407	-0.00160933	-0.528567	-0.929859
E4	Itgb1_KO	Mafa	SYBR	0.759512	1.2675	29.484	29.0575	0.290624	8.64174	0.150974	0.237338	1	40			3.52593	0.759573	1.07601	0.0162692	0.715993	1.99801	0.355757	0.0993161	-0.499671	-0.898518
E5	Itgb1_KO	MafB	SYBR	0.532476	0.67374	25.9937	25.8718	0.111973	5.45609	0.0693679	0.284783	1	40
E6	Itgb1_KO	Arx	SYBR	0.19795	0.27459	32.4731	32.5174	0.174705	12.1017	0.0964772	0.218403	1	40
E7	Itgb1_KO	Etv1	SYBR	0.62059	0.871753	28.0204	27.9008	0.182858	7.48507	0.100183	0.100737	1	40		RQ	0.111229	0.535021	0.282518	0.760438	0.573362	0.25042	0.705242	1.06345	1.66899	2.23662
E8	Itgb1_KO	Aldhla3	SYBR	0.928289	1.07667	27.8079	27.8381	0.0305559	7.42236	0.0437131	0.237471	1	40			0.0936179	0.47559	0.242235	1.05665	0.619702	0.211157	0.662677	1.00514	1.49523	1.70014
E9	Itgb1_KO	Hk1	SYBR	1.36317	1.655	28.0859	28.179	0.0798251	7.7633	0.0571876	0.282302	1	40			0.0911233	0.545865	0.373586	1.16645	0.594988	0.223187	0.801399	1.00112	1.4425	1.90509
E10	Itgb1_KO	LdhA	SYBR	1.64538	2.23342	26.2635	26.4271	0.16046	6.01139	0.0900792	0.225641	1	40			0.086814	0.590671	0.47434	0.988786	0.608786	0.250345	0.78146	0.933475	1.41389	1.86415
E11	Itgb1_KO	Cyclio	SYBR			20.4746	20.4157	0.0819125			0.101612	1	40			0.095696	0.536787	0.34317	0.99308	0.59921	0.233777	0.737695	1.00079	1.50515	1.9265
F1	Itgb1_KO	Itgb1	SYBR	0.0845412	0.107357	37.7277	37.6697	0.114602	17.2539	0.070433	0.0588055	1	40
F2	Itgb1_KO	Slc2a2	SYBR	0.447253	0.640419	23.6429	23.4397	0.195173	3.024	0.105832	0.192508	1	40
F3	Itgb1_KO	Unc3	SYBR	0.216112	0.509569	23.9057	23.4187	0.499063	3.00297	0.25287	0.197557	1	40
F4	Itgb1_KO	Mafa	SYBR	0.759512	1.2675	28.9834	29.0575	0.290624	8.64174	0.150974	0.237338	1	40
F5	Itgb1_KO	MafB	SYBR	0.532476	0.67374	25.8555	25.8718	0.111973	5.45609	0.0693679	0.284783	1	40
F6	Itgb1_KO	Arx	SYBR	0.19795	0.27459	32.6931	32.5174	0.174705	12.1017	0.0964772	0.218403	1	40
F7	Itgb1_KO	Etv1	SYBR	0.62059	0.871753	28.0841	27.9008	0.182858	7.48507	0.100183	0.100737	1	40
F8	Itgb1_KO	Aldhla3	SYBR	0.928289	1.07667	27.8632	27.8381	0.0305559	7.42236	0.0437131	0.237471	1	40
F9	Itgb1_KO	Hk1	SYBR	1.36317	1.655	28.2184	28.179	0.0798251	7.7633	0.0571876	0.282302	1	40
F10	Itgb1_KO	LdhA	SYBR	1.64538	2.23342	26.6331	26.4271	0.16046	6.01139	0.0900792	0.225641	1	40
F11	Itgb1_KO	Cyclio	SYBR			20.4486	20.4157	0.0819125			0.101612	1	40
G1	Itgb1_KO	Itgb1	SYBR	0.0845412	0.107357	37.7634	37.6697	0.114602	17.2539	0.070433	0.0588055	1	40
G2	Itgb1_KO	Slc2a2	SYBR	0.447253	0.640419	23.4408	23.4397	0.195173	3.024	0.105832	0.192508	1	40
G3	Itgb1_KO	Unc3	SYBR	0.216112	0.509569	23.2774	23.4187	0.499063	3.00297	0.25287	0.197557	1	40
G4	Itgb1_KO	Mafa	SYBR	0.759512	1.2675	28.8375	29.0575	0.290624	8.64174	0.150974	0.237338	1	40
G5	Itgb1_KO	MafB	SYBR	0.532476	0.67374	25.911	25.8718	0.111973	5.45609	0.0693679	0.284783	1	40
G6	Itgb1_KO	Arx	SYBR	0.19795	0.27459	32.6099	32.5174	0.174705	12.1017	0.0964772	0.218403	1	40
G7	Itgb1_KO	Etv1	SYBR	0.62059	0.871753	27.8066	27.9008	0.182858	7.48507	0.100183	0.100737	1	40
G8	Itgb1_KO	Aldhla3	SYBR	0.928289	1.07667	27.8657	27.8381	0.0305559	7.42236	0.0437131	0.237471	1	40
G9	Itgb1_KO	Hk1	SYBR	1.36317	1.655	28.2669	28.179	0.0798251	7.7633	0.0571876	0.282302	1	40
G10	Itgb1_KO	LdhA	SYBR	1.64538	2.23342	26.4657	26.4271	0.16046	6.01139	0.0900792	0.225641	1	40
G11	Itgb1_KO	Cyclio	SYBR			20.4453	20.4157	0.0819125			0.101612	1	40
H1	Itgb1_KO	Itgb1	SYBR	0.0845412	0.107357	37.6825	37.6697	0.114602	17.2539	0.070433	0.0588055	1	40
H2	Itgb1_KO	Slc2a2	SYBR	0.447253	0.640419	23.1762	23.4397	0.195173	3.024	0.105832	0.192508	1	40
H3	Itgb1_KO	Unc3	SYBR	0.216112	0.509569	22.782	23.4187	0.499063	3.00297	0.25287	0.197557	1	40
H4	Itgb1_KO	Mafa	SYBR	0.759512	1.2675	28.925	29.0575	0.290624	8.64174	0.150974	0.237338	1	40
H5	Itgb1_KO	MafB	SYBR	0.532476	0.67374	25.7271	25.8718	0.111973	5.45609	0.0693679	0.284783	1	40
H6	Itgb1_KO	Arx	SYBR	0.19795	0.27459	32.2934	32.5174	0.174705	12.1017	0.0964772	0.218403	1	40
H7	Itgb1_KO	Etv1	SYBR	0.62059	0.871753	27.6921	27.9008	0.182858	7.48507	0.100183	0.100737	1	40
H8	Itgb1_KO	Aldhla3	SYBR	0.928289	1.07667	27.8157	27.8381	0.0305559	7.42236	0.0437131	0.237471	1	40
H9	Itgb1_KO	Hk1	SYBR	1.36317	1.655	28.145	28.179	0.0798251	7.7633	0.0571876	0.282302	1	40
H10	Itgb1_KO	LdhA	SYBR	1.64538	2.23342	26.3462	26.4271	0.16046	6.01139	0.0900792	0.225641	1	40
H11	Itgb1_KO	Cyclio	SYBR			20.2945	20.4157	0.0819125			0.101612	1	40
Analysis Type	Singleplex
Endogenous Control	Cyclio
RQ Min/Max Confidence Level	95.0
Reference Sample	WT_Control
