# Supplementary material for: Coordination between ECM and cell-cell adhesion regulates the development of islet aggregation, architecture, and functional maturation
Source: eLife. 2023 Aug 23;12:e90006. doi: 10.7554/eLife.90006 (PMC10482429; doi:10.7554/eLife.90006)
Supplement: Figure 1—source data 1. [file elife-90006-fig1-data1.xlsx]

## Sheet: Fig 1J
IPGTT 6-16 weeks Old
Control (n= 9)								Mutant (n= 10)
	T0 min	T15 min	T30 min	T60 min	T90 min	T120 min			T0 min	T15 min	T30 min	T60 min	T90 min	T120 min
	(mg/dL)	(mg/dL)	(mg/dL)	(mg/dL)	(mg/dL)	(mg/dL)			(mg/dL)	(mg/dL)	(mg/dL)	(mg/dL)	(mg/dL)	(mg/dL)
1	169	359	306	211	192	211		1	191	379	431	260	232	216
2	128	304	253	179	193	162		2	150	460	392	252	233	176
3	151	328	253	200	188	162		3	204	532	611	486	340	271
4	137	327	206	170	168	153		4	222	291	283	262	232	238
5	123	308	206	162	158	153		5	195	436	538	579	425	400
6	185	473	356	234	224	162		6	194	447	308	255	140	227
7	158	327	319	211	222	198		7	152	292	272	166	158	138
8	198	481	348	210	255	204		8	198	378	387	325	294	274
9	252	526	335	254	233	166		9	162	236	289	269	216	218
	166.778	381.444	286.889	203.444	203.667	174.556		10	300	451	648	431	419	358
	40.6318	86.5088	58.7419	29.7746	31.8159	22.968			196.8	390.2	415.9	328.5	268.9	251.6
									43.1941	92.8174	139.281	128.405	99.0549	78.9011
