# Supplementary material for: Coordination between ECM and cell-cell adhesion regulates the development of islet aggregation, architecture, and functional maturation
Source: eLife. 2023 Aug 23;12:e90006. doi: 10.7554/eLife.90006 (PMC10482429; doi:10.7554/eLife.90006)
Supplement: Figure 1—source data 2. [file elife-90006-fig1-data2.xlsx]

## Sheet: Fig 1K
GSIS in vivo 8 weeks old
Control (n= 8)	Insulin (ug/L)					Mutant (n= 12)	Insulin (ug/L)
	T0	T15	T15-T0				T0	T15	T15-T0
1	0.204	0.439	0.235			1	0.0336418	0.05136	0.018
2	0.163	0.213	0.05			2	0.225875	0.20275	-0.023
3	0.18	0.303	0.123			3	0.127851	0.148446	0.021
4	0.16	0.227	0.067			4	0.0445307	0.121075	0.077
5	0.155	0.234	0.079			5	0.0829917	0.133196	0.05
6	0.085	0.128	0.043			6	0.165985	0.20148	0.035
7	0.078	0.413	0.335			7	0.0840328	0.208896	0.125
8	0.052	0.272	0.22			8	0.1388	0.0948876	-0.044
	0.134625	0.278625	0.144			9	0.0439195	0.0914192	0.047
	0.0550738	0.104243	0.107018			10	0.0658207	0.161601	0.096
						11	0.112946	0.313678	0.201
						12	0.139589	0.246562	0.107
							0.105499	0.164613	0.0591667
							0.0573581	0.0737988	0.0672686
