# Supplementary material for: Coordination between ECM and cell-cell adhesion regulates the development of islet aggregation, architecture, and functional maturation
Source: eLife. 2023 Aug 23;12:e90006. doi: 10.7554/eLife.90006 (PMC10482429; doi:10.7554/eLife.90006)
Supplement: Figure 1—source data 3. [file elife-90006-fig1-data3.xlsx]

## Sheet: Fig1L
IPGTT 6-12 months Old
Control (n= 22)								Mutant (n= 16)
	T0 min	T15 min	T30 min	T60 min	T90 min	T120 min			T0 min	T15 min	T30 min	T60 min	T90 min	T120 min
	(mg/dL)	(mg/dL)	(mg/dL)	(mg/dL)	(mg/dL)	(mg/dL)			(mg/dL)	(mg/dL)	(mg/dL)	(mg/dL)	(mg/dL)	(mg/dL)
1	118	293	372	182	152	135		1	198	490	529	379	305	250
2	152	362	157	157	133	120		2	206	457	358	256	295	257
3	137	340	332	213	164	191		3	149	337	312	177	180	159
4	148	350	263	233	195	154		4	201	533	334	231	239	196
5	151	344	422	192	215	139		5	119	347	180	161	136	95
6	122	249	183	136	128	124		6	163	220	438	432	270	190
7	141	360	303	184	149	119		7	192	345	446	366	295	211
8	116	252	292	132	116	83		8	265	426	430	336	321	344
9	107	152	151	117	104	90		9	203	504	407	370	355	318
10	128	329	232	145	135	125		10	190	448	446	275	293	258
11	196	410	283	276	151	206		11	259	363	522	458	400	387
12	233	496	387	294	291	222		12	259	363	522	458	400	387
13	204	458	413	304	262	216		13	282	533	630	507	451	406
14	146	414	326	199	177	194		14	269	560	527	591	438	401
15	180	448	283	230	188	167		15	219	493	413	273	271	242
16	212	394	384	287	283	217		16	292	639	639	608	521	343
17	177	356	356	342	245	205			216.625	441.125	445.812	367.375	323.125	277.75
18	134	376	376	242	189	162			50.2127	106.387	117.767	135.747	100.823	94.8624
19	184	479	452	322	254	259
20	149	506	298	201	172	160
21	194	398	452	273	203	194
22	171	371	365	280	231	186
	159.091	369.864	321.909	224.591	188.045	166.727
	34.4603	84.8103	87.5415	66.0163	54.5025	46.2449
