# Supplementary material for: Coordination between ECM and cell-cell adhesion regulates the development of islet aggregation, architecture, and functional maturation
Source: eLife. 2023 Aug 23;12:e90006. doi: 10.7554/eLife.90006 (PMC10482429; doi:10.7554/eLife.90006)
Supplement: Figure 2—figure supplement 1—source data 1. [file elife-90006-fig2-figsupp1-data1.xlsx]

## Sheet: Suppl 2-1I
Percent Beta Cell Area in Ucn-Cre; Itgb1 KO mice
Control								Mutant
		Area 1	Area 2	Area 3		% Beta Cell Area				Area 1	Area 2	Area 3		% Beta Cell Area
Islet Tissue Area	1	3.05736e+07				0.158909		Islet Tissue Area	1	19052038	10308956	920687		0.252816
Beta Cell Area	2023_#666A_CD31488_SSTCy3_InsCy5_20x.nd2 - C=3	48584.1						Beta Cell Area	2023_#281a_CD31488_InsCy3_Itgb1Cy5_20x.nd2 - C=3	76557
Islet Tissue Area	1	2.6273e+07				0.203784		Islet Tissue Area	1	27943014	3.03222e+06	189.408		0.1786
Beta Cell Area	2023_#666B_CD31488_SSTCy3_InsCy5_20x.nd2 - C=3	53540.3						Beta Cell Area	2023_#281b_CD31488_InsCy3_Itgb1Cy5_20x.nd2 - C=3	55321.7
Islet Tissue Area	1	1.89955e+07				0.211635		Islet Tissue Area	1	2.97781e+07				0.205334
Beta Cell Area	2023_#666C_CD31488_SSTCy3_InsCy5_20x.nd2 - C=3	40201.2						Beta Cell Area	2023_#281c_CD31488_InsCy3_Itgb1Cy5_20x.nd2 - C=3	61144.6
								Islet Tissue Area	1	2.11712e+07				0.140789
Islet Tissue Area	1	1.95418e+07				0.315231		Beta Cell Area	2023_#665A_CD31488_SSTCy3_InsCy5_20x.nd2 - C=3	29806.8
Beta Cell Area	2023_#674A_CD31488_InsCy3_Itgb1Cy5_20x.nd2 - C=2	61601.9
								Islet Tissue Area	1	2.04437e+07				0.200294
Islet Tissue Area	1	4.38021e+07				0.466945		Beta Cell Area	2023_#665B_CD31488_SSTCy3_InsCy5_20x.nd2 - C=3	40947.4
Beta Cell Area	2023_#674b_CD31488_InsCy3_Itgb1Cy5_20x.nd2 - C=2	204532
								Islet Tissue Area	1	2.42297e+07				0.157054
Islet Tissue Area	1	3.46705e+07				0.25021		Beta Cell Area	2023_#665C_CD31488_SSTCy3_InsCy5_20x.nd2 - C=3	38053.7
Beta Cell Area	2023_#674c_CD31488_InsCy3_Itgb1Cy5_20x.nd2 - C=2	86749.1
								Islet Tissue Area	1	1.18207e+07				0.231781
Islet Tissue Area	1	19031686	564895			0.0424384		Beta Cell Area	20230103_Itgb2023_#677A_CD31488_GlucagonCy3_InsCy5_20x.nd2 - C=3	27398.2
Beta Cell Area	20230103_Itgb2023_#282A_CD31488_GlucagonCy3_InsCy5_20x.nd2 - C=3	8316.48
								Islet Tissue Area	1	2.47046e+06	12041878			0.275374
Islet Tissue Area	1	2.41424e+07				0.183162		Beta Cell Area	20230103_Itgb2023_#677B_CD31488_GlucagonCy3_InsCy5_20x.nd2 - C=3	39963.3
Beta Cell Area	20230103_Itgb2023_#282B_CD31488_GlucagonCy3_InsCy5_20x.nd2 - C=3	44219.6
								Islet Tissue Area	1	10138287	4306981	159.453		0.0824815
Islet Tissue Area	1	3.47704e+07				0.210199		Beta Cell Area	20230103_Itgb2023_#677C_CD31488_GlucagonCy3_InsCy5_20x.nd2 - C=3	11914.7
Beta Cell Area	20230103_Itgb2023_#282C_CD31488_GlucagonCy3_InsCy5_20x.nd2 - C=3	73087.1
Islet Tissue Area	1	6.32413e+06	17011882			0.27267
Beta Cell Area	20230103_Itgb2023_#664A_CD31488_GlucagonCy3_InsCy5_20x.nd2 - C=3	63630.4
Islet Tissue Area	1	15204182	11042855			0.526073
Beta Cell Area	20230103_Itgb2023_#664B_CD31488_GlucagonCy3_InsCy5_20x.nd2 - C=3	138079
Islet Tissue Area	1	2.56627e+07				0.467068
Beta Cell Area	20230103_Itgb2023_#664C_CD31488_GlucagonCy3_InsCy5_20x.nd2 - C=3	119862
