# Supplementary material for: Coordination between ECM and cell-cell adhesion regulates the development of islet aggregation, architecture, and functional maturation
Source: eLife. 2023 Aug 23;12:e90006. doi: 10.7554/eLife.90006 (PMC10482429; doi:10.7554/eLife.90006)
Supplement: Figure 2—figure supplement 2—source data 1. [file elife-90006-fig2-figsupp2-data1.xlsx]

## Sheet: Suppl 2-2B
Aggregate Size after 2 hour incubation
(n = 36)			(n = 27)			(n = 27)			(n = 27)
Control without ECM			Mutant without ECM			Control with ECM			Mutant with ECM
	Aggregate Size (μm^2)			Aggregate Size (μm^2)			Aggregate Size (μm^2)			Aggregate Size (μm^2)
	Control			Mutant			Control			Mutant
1	8728		1	7247.75		1	920		1	2627.45
2	6920		2	7199.35		2	404		2	1391.8
3	3412		3	3950.53		3	308		3	1355.99
4	11336		4	14601		4	308		4	2157.06
5	3148		5	8450.17		5	308		5	1920.26
6	2480		6	8319.18		6	264		6	1642.16
7	7048		7	10619.8		7	528		7	1937.68
8	5056		8	5501.38		8	248		8	1501.49
9	4628		9	4906.14		9	232		9	1426.64
10	26648		10	9297.38		10	857.2		10	1813.79
11	8820		11	7249.36		11	534.6		11	1730.56
12	1828		12	4497.38		12	496.2		12	1712.49
13	18952		13	19816.5		13	319.7		13	2739.08
14	5460		14	6570.24		14	265.8		14	2491.63
15	4488		15	3583.71		15	257.1		15	2367.74
16	30064		16	12461.4		16	575.2		16	5471.06
17	4256		17	5587.2		17	508.1		17	3047.51
18	2508		18	4936.15		18	501.4		18	2826.51
19	9832.9		19	10425.9		19	256.49		19	374.57
20	4930.3		20	5131.01		20	228.1		20	289.39
21	4390.9		21	4304.45		21	226.8		21	245.52
22	5142.9		22	8031.4		22	382.31		22	418.12
23	3184.3		23	7473.26		23	365.53		23	334.24
24	3056.9		24	4357.36		24	363.92		24	297.78
25	8498.9		25	14499.4		25	402.63		25	213.9
26	4481.6		26	2399.68		26	247.78		26	206.48
27	3870.5		27	1614.09		27	247.78		27	200.99
28	23450.2		28	10425.9
29	3233.34		29	5131.01
30	2302.57		30	4304.45
31	25357		31	8031.4
32	3595		32	7473.26
33	1789.6		33	4357.36
34	29614.6		34	14499.4
35	5672.7		35	2399.68
36	5381.69		36	1614.09
37	9832.9
38	4930.3
39	4390.9
40	5142.9
41	3184.3
42	3056.9
43	8498.9
44	4481.6
45	3870.5
46	23450.2
47	3233.34
48	2302.57
49	25357
50	3595
51	1789.6
52	29614.6
53	5672.7
54	5381.69
