# Supplementary material for: Coordination between ECM and cell-cell adhesion regulates the development of islet aggregation, architecture, and functional maturation
Source: eLife. 2023 Aug 23;12:e90006. doi: 10.7554/eLife.90006 (PMC10482429; doi:10.7554/eLife.90006)
Supplement: Figure 2—source data 1. [file elife-90006-fig2-data1.xlsx]

## Sheet: Fig 2C
Average Isolated Islet Size
Control (n= 606)			Mutant (n= 435)
	um^2 x 10^3			um^2 x 10^3
1	2.81641		1	10.0309
2	2.83029		2	10.1095
3	8.87933		3	10.4286
4	9.34642		4	10.5396
5	9.869		5	10.5581
6	10.5673		6	10.8679
7	10.6829		7	11.298
8	10.9095		8	11.7235
9	10.9835		9	12.9028
10	12.3154		10	13.0184
11	12.4403		11	13.393
12	12.6345		12	13.9526
13	12.8242		13	14.0358
14	13.3282		14	15.1041
15	13.8554		15	15.2058
16	14.1745		16	15.2798
17	14.4335		17	16.3944
18	14.6786		18	16.7597
19	15.2521		19	17.0881
20	15.7053		20	17.1482
21	15.8533		21	17.2222
22	16.8245		22	17.5691
23	17.0187		23	18.013
24	17.3239		24	18.1471
25	17.3748		25	18.2443
26	17.4627		26	18.272
27	17.5274		27	18.383
28	17.7078		28	18.4523
29	17.7725		29	18.9842
30	17.865		30	19.2339
31	17.865		31	19.4004
32	18.2859		32	19.553
33	18.3321		33	20.552
34	18.5449		34	20.6953
35	18.9518		35	20.9034
36	19.4282		36	20.9913
37	19.9369		37	21.7497
38	20.0432		38	22.1706
39	20.0432		39	23.558
40	21.2734		40	23.8724
41	21.8931		41	24.2794
42	22.055		42	24.358
43	22.67		43	24.8205
44	22.707		44	24.9361
45	22.9753		45	25.3246
46	23.4192		46	25.4402
47	23.9603		47	25.7177
48	24.6494		48	26.1061
49	24.7835		49	26.3328
50	26.0599		50	27.2438
51	26.4206		51	27.3733
52	27.3872		52	27.8265
53	27.4057		53	28.9272
54	28.2797		54	30.0186
55	28.5341		55	31.7066
56	28.9688		56	33.0755
57	29.1815		57	34.264
58	29.496		58	36.2388
59	29.7087		59	37.973
60	30.8695		60	38.8101
61	30.8695		61	41.1871
62	31.184		62	42.445
63	31.6419		63	42.8243
64	33.0478		64	43.333
65	34.1345		65	43.5318
66	35.1335		66	43.6752
67	35.7162		67	45.6915
68	36.1648		68	51.5047
69	36.877		69	56.6705
70	37.3533		70	64.8607
71	38.676		71	66.04
72	39.8552		72	67.4505
73	45.6222		73	74.7713
74	49.0999		74	75.3679
75	49.8954		75	76.6906
76	51.4307		76	97.8391
77	53.3222		77	100.332
78	72.4636		78	112.624
79	7.51043		79	206.606
80	7.93128		80	7.87578
81	8.75446		81	9.48053
82	8.85158		82	9.50828
83	9.38804		83	10.4193
84	11.2287		84	10.4841
85	11.2842		85	11.2795
86	12.3571		86	11.9223
87	12.4681		87	13.4901
88	12.8427		88	13.5687
89	13.3514		89	13.7075
90	13.4531		90	14.3364
91	13.7722		91	14.4752
92	13.9063		92	15.4093
93	14.6093		93	15.5342
94	15.2567		94	18.1379
95	15.377		95	18.2396
96	15.5018		96	19.8906
97	15.5111		97	20.2652
98	15.8672		98	21.2271
99	16.6765		99	22.1567
100	16.9262		100	22.4897
101	17.1944		101	23.1973
102	17.7448		102	24.7049
103	18.1286		103	26.4206
104	19.2894		104	26.8137
105	20.9173		105	27.1097
106	21.0375		106	28.7607
107	22.5683		107	28.7977
108	22.6053		108	29.2232
109	22.781		109	33.6952
110	24.0251		110	35.4156
111	24.0852		111	37.4134
112	24.3858		112	43.9851
113	24.691		113	45.6268
114	24.765		114	54.1917
115	24.7789		115	5.01775
116	24.9731		116	6.87223
117	25.5743		117	8.2365
118	26.5362		118	8.43536
119	26.6565		119	9.15218
120	26.6565		120	9.52678
121	26.675		121	9.58227
122	27.7525		122	10.2621
123	28.3861		123	10.35
124	28.7098		124	10.6968
125	29.2232		125	11.4368
126	29.4081		126	11.7651
127	29.459		127	12.0102
128	29.8059		128	12.2877
129	30.8418		129	12.949
130	31.7297		130	12.9721
131	32.835		131	12.986
132	34.1345		132	13.3005
133	35.7948		133	13.3606
134	36.0584		134	13.4022
135	36.7706		135	13.4115
136	36.7891		136	14.1006
137	37.492		137	14.2532
138	39.2217		138	14.4058
139	40.9652		139	14.5029
140	41.4415		140	14.5908
141	41.9363		141	14.6
142	42.3017		142	14.6509
143	42.7919		143	14.8636
144	43.0231		144	15.044
145	43.2451		145	15.2798
146	48.0316		146	15.2891
147	49.0629		147	15.4186
148	50.2052		148	15.6544
149	54.9547		149	15.6729
150	68.6206		150	15.7469
151	6.36352		151	16.8106
152	6.60862		152	16.9817
153	7.60755		153	16.9863
154	7.76016		154	17.0696
155	8.52323		155	17.1713
156	10.9743		156	17.3147
157	11.0714		157	17.4211
158	11.1824		158	17.8881
159	11.298		159	18.346
160	11.409		160	18.4015
161	11.7559		161	18.79
162	11.7559		162	19.2293
163	12.0287		163	19.3912
164	12.0981		164	19.4929
165	12.2137		165	19.5484
166	12.3571		166	20.0016
167	12.5976		167	20.145
168	12.6022		168	20.5704
169	12.9028		169	20.9635
170	12.9213		170	20.9867
171	13.43		171	21.7867
172	13.4392		172	22.3186
173	13.5733		173	22.3417
174	14.0127		174	22.633
175	14.1006		175	23.336
176	14.1191		176	23.7661
177	14.3965		177	24.6679
178	14.5908		178	24.7974
179	14.9006		179	25.6668
180	15.0116		180	25.8056
181	15.2752		181	25.9165
182	15.2798		182	26.1339
183	15.3492		183	27.2808
184	15.5296		184	27.6878
185	15.7608		185	28.3445
186	15.9273		186	28.3722
187	16.3574		187	28.5526
188	16.4083		188	29.6255
189	16.5562		189	29.8891
190	16.5979		190	30.3978
191	16.658		191	31.1748
192	16.7551		192	31.184
193	16.8569		193	31.3551
194	17.0048		194	31.7251
195	17.1528		195	33.0385
196	17.4673		196	33.1495
197	17.6893		197	33.1819
198	17.902		198	35.2075
199	18.05		199	35.5497
200	18.3737		200	36.2896
201	18.8778		201	36.655
202	18.9241		202	37.3718
203	19.1275		203	39.6564
204	19.2108		204	39.772
205	19.5484		205	41.127
206	19.627		206	42.0427
207	19.6501		207	42.5052
208	19.8166		208	44.4891
209	20.4964		209	45.8997
210	20.5288		210	50.4781
211	20.6629		211	51.3752
212	20.6861		212	53.2575
213	20.76		213	61.2674
214	20.7739		214	63.2328
215	20.8849		215	66.595
216	20.9034		216	74.9425
217	21.1901		217	78.9705
218	21.2271		218	87.9239
219	21.6017		219	100.665
220	21.7359		220	108.291
221	21.833		221	7.07571
222	21.9208		222	7.35319
223	21.9902		223	8.14863
224	22.1706		224	8.98107
225	22.2214		225	11.6264
226	22.7255		226	11.9455
227	22.8041		227	12.5282
228	22.9521		228	12.9352
229	23.077		229	13.097
230	24.58		230	13.3005
231	25.0656		231	13.3884
232	25.9628		232	13.5086
233	26.3744		233	13.8046
234	26.4761		234	14.5168
235	26.5917		235	14.8544
236	27.1513		236	14.9053
237	27.3964		237	15.5943
238	28.2936		238	15.6498
239	28.9642		239	16.4823
240	29.0058		240	17.0835
241	29.7458		241	18.9148
242	29.8752		242	19.4143
243	30.1666		243	21.426
244	30.4533		244	22.9429
245	30.4626		245	23.669
246	30.8649		246	23.9603
247	30.888		247	24.1314
248	30.8927		248	24.284
249	30.9389		249	25.1858
250	31.3736		250	28.2011
251	31.4245		251	28.9827
252	31.4707		252	36.7845
253	31.7436		253	37.6308
254	31.9841		254	47.3934
255	32.2338		255	49.5624
256	33.0894		256	52.61
257	34.0282		257	6.22478
258	34.2594		258	6.66412
259	34.8282		259	7.48268
260	34.9161		260	7.69079
261	37.5152		261	8.18101
262	38.5927		262	8.37062
263	40.5073		263	8.56485
264	40.5582		264	8.81458
265	41.6033		265	9.09669
266	43.8324		266	9.11519
267	44.2117		267	9.91062
268	44.6741		268	10.3084
269	46.2835		269	11.039
270	48.5265		270	11.3535
271	49.4838		271	12.0472
272	51.0099		272	12.0842
273	53.7384		273	12.1675
274	55.5698		274	12.653
275	80.566		275	12.8288
276	4.73564		276	12.9167
277	4.80039		277	13.726
278	5.99355		278	14.3087
279	6.07217		279	14.4104
280	6.10454		280	15.8718
281	7.60755		281	16.0892
282	8.22263		282	17.3054
283	8.34287		283	18.2951
284	8.42149		284	18.605
285	8.46311		285	19.5854
286	8.6111		286	20.0525
287	8.64347		287	20.5704
288	8.67122		288	21.0005
289	8.73134		289	21.0422
290	8.78221		290	22.744
291	8.79608		291	23.114
292	8.99957		292	27.845
293	9.14756		293	29.533
294	9.43891		294	29.6856
295	9.48978		295	31.0684
296	9.77189		296	34.6016
297	9.91987		297	35.3416
298	10.0124		298	37.2978
299	10.0309		299	49.9046
300	10.3962		300	50.0757
301	10.5442		301	58.4879
302	10.6737		302	74.0268
303	10.6829		303	78.041
304	10.8957		304	6.2294
305	10.9882		305	6.6595
306	11.0252		306	6.82598
307	11.1315		307	8.04689
308	11.224		308	8.5556
309	11.5616		309	8.72672
310	11.7235		310	9.40654
311	11.7281		311	9.98
312	11.7374		312	10.1881
313	11.9963		313	10.3407
314	12.0518		314	10.3592
315	12.0565		315	10.7431
316	12.0888		316	10.7662
317	12.3941		317	11.4506
318	12.542		318	11.6772
319	12.8889		319	11.9963
320	13.1849		320	12.2322
321	13.5132		321	13.5549
322	13.652		322	14.3364
323	13.8832		323	14.8266
324	13.948		324	14.9053
325	14.2624		325	15.5157
326	14.3873		326	15.5573
327	14.7804		327	15.8302
328	14.9561		328	16.917
329	15.118		329	19.5484
330	15.1226		330	20.3438
331	15.599		331	20.3438
332	15.7747		332	21.3705
333	15.9319		333	22.6423
334	15.9597		334	23.558
335	16.0475		335	24.2563
336	16.1169		336	24.7511
337	16.2325		337	25.135
338	16.3296		338	25.2598
339	16.3481		339	30.5736
340	16.3713		340	30.6476
341	16.7042		341	32.8304
342	16.7782		342	33.7183
343	16.9863		343	60.5829
344	17.3332		344	60.865
345	17.495		345	81.6945
346	17.5367
347	17.6292
348	17.7725
349	17.8465
350	17.9205
351	17.9575
352	17.9853
353	18.1425
354	18.1564
355	18.4477
356	18.5449
357	18.7067
358	18.7715
359	19.516
360	19.9831
361	20.1912
362	20.2143
363	20.3115
364	20.5751
365	20.6629
366	20.6768
367	21.5694
368	22.3093
369	22.5637
370	22.7302
371	22.9753
372	23.1232
373	24.2424
374	24.9685
375	25.1026
376	25.4402
377	25.6437
378	25.7084
379	26.4808
380	27.1004
381	28.3214
382	29.2555
383	30.0648
384	34.4352
385	34.5785
386	34.9115
387	36.8677
388	38.7129
389	40.6414
390	42.8983
391	43.1989
392	44.3319
393	59.8476
394	1.2764
395	4.81889
396	4.82813
397	5.39234
398	6.56238
399	6.57163
400	6.63175
401	6.98785
402	7.01097
403	7.03409
404	7.06184
405	7.07571
406	7.14046
407	7.20058
408	7.20058
409	7.41331
410	7.6723
411	8.10239
412	8.6111
413	8.64347
414	8.96257
415	9.01807
416	9.02732
417	9.09669
418	9.26317
419	9.2678
420	9.27242
421	9.75801
422	9.87363
423	9.97075
424	10.4147
425	10.4425
426	10.7847
427	10.8078
428	10.9373
429	10.9743
430	11.0437
431	11.0714
432	11.0807
433	11.0945
434	11.2148
435	11.3165
436	11.4368
437	11.779
438	11.8715
439	11.927
440	11.9362
441	12.0333
442	12.1258
443	12.1721
444	12.4126
445	12.5513
446	12.7409
447	12.8195
448	13.0184
449	13.1849
450	13.356
451	13.4346
452	13.4947
453	13.8832
454	13.9433
455	14.2069
456	14.2301
457	14.2809
458	14.5815
459	14.6
460	14.6648
461	15.0995
462	15.4741
463	15.4833
464	15.6776
465	15.7146
466	15.9504
467	15.9828
468	16.5192
469	16.6256
470	16.7181
471	16.8615
472	16.9308
473	17.0048
474	17.8789
475	18.161
476	18.3645
477	18.9472
478	19.5576
479	19.9415
480	20.0941
481	20.1542
482	20.1589
483	20.2791
484	20.3716
485	20.4317
486	20.8202
487	21.3243
488	21.4861
489	21.6064
490	21.8931
491	21.9763
492	22.3371
493	22.5313
494	22.6793
495	23.2065
496	23.7013
497	23.743
498	23.8123
499	23.9788
500	24.2748
501	24.3858
502	24.7789
503	25.2413
504	27.9236
505	28.5711
506	28.8671
507	29.4498
508	30.4348
509	30.6938
510	32.724
511	34.7404
512	34.8375
513	35.1797
514	42.741
515	43.2174
516	43.7214
517	52.1106
518	53.0309
519	4.50903
520	5.74844
521	5.91493
522	6.06292
523	6.65025
524	6.86761
525	7.09884
526	7.39944
527	7.81103
528	7.81566
529	8.14401
530	8.25038
531	8.35212
532	8.44924
533	8.48623
534	8.52786
535	8.62497
536	8.68047
537	8.72209
538	8.76834
539	8.79146
540	9.11519
541	9.11519
542	9.18918
543	9.71639
544	9.73489
545	9.83201
546	9.97075
547	10.017
548	10.4656
549	10.6829
550	10.7384
551	10.7754
552	10.8171
553	10.8633
554	11.0575
555	11.0899
556	11.1824
557	11.3304
558	11.7605
559	11.853
560	12.2461
561	12.2923
562	12.5605
563	12.5883
564	13.0646
565	13.3236
566	13.6057
567	13.7075
568	13.7861
569	13.8369
570	14.1052
571	14.2624
572	14.3457
573	14.4474
574	14.4983
575	14.8313
576	14.9746
577	15.1087
578	15.1411
579	15.34
580	16.0244
581	16.4453
582	16.8985
583	16.9817
584	17.0372
585	17.3054
586	17.9945
587	18.4477
588	18.5865
589	18.6651
590	18.9379
591	20.4687
592	20.6999
593	22.0735
594	23.0446
595	23.0862
596	23.1834
597	25.0934
598	25.4772
599	26.3096
600	26.9663
601	27.4935
602	35.4017
603	35.5034
604	36.0075
605	40.4888
606	55.8658
