# Supplementary material for: Coordination between ECM and cell-cell adhesion regulates the development of islet aggregation, architecture, and functional maturation
Source: eLife. 2023 Aug 23;12:e90006. doi: 10.7554/eLife.90006 (PMC10482429; doi:10.7554/eLife.90006)
Supplement: Figure 2—source data 2. [file elife-90006-fig2-data2.xlsx]

## Sheet: Fig 2D
Total Isolated Islet Area
Control (n= 6)			Mutant (n= 6)
	um^2 x 10^3		um^2 x 10^3
	1857.88		2596.02
	1889.89		779.254
	2946.66		2843.29
	2066.53		741.872
	2091.02		1010.14
	1307.54		843.749
