# Supplementary material for: Coordination between ECM and cell-cell adhesion regulates the development of islet aggregation, architecture, and functional maturation
Source: eLife. 2023 Aug 23;12:e90006. doi: 10.7554/eLife.90006 (PMC10482429; doi:10.7554/eLife.90006)
Supplement: Figure 2—source data 3. [file elife-90006-fig2-data3.xlsx]

## Sheet: Fig 2E
Isolated Islet Size Distribution
Control (n= 606)								Mutant (n= 345)
Size (um^2)	A	B	C	D	E	F	Size (um^2)	A	B	C	D	E	F
0-25	49	38	80	99	109	78	0-25	44	23	64	28	35	33
25-50	26	31	41	18	14	9	25-50	23	11	31	7	8	6
50+	3	3	4	1	2	1	50+	12	1	11	1	4	3
Total	78	72	125	118	125	88	Total	79	35	106	36	47	42
Frequency							Frequency
0-25	0.628205	0.527778	0.64	0.838983	0.872	0.886364	0-25	0.556962	0.657143	0.603774	0.777778	0.744681	0.785714
25-50	0.333333	0.430556	0.328	0.152542	0.112	0.102273	25-50	0.291139	0.314286	0.292453	0.194444	0.170213	0.142857
>50	0.0384615	0.0416667	0.032	0.00847458	0.016	0.0113636	>50	0.151899	0.0285714	0.103774	0.0277778	0.0851064	0.0714286
