# Supplementary material for: Coordination between ECM and cell-cell adhesion regulates the development of islet aggregation, architecture, and functional maturation
Source: eLife. 2023 Aug 23;12:e90006. doi: 10.7554/eLife.90006 (PMC10482429; doi:10.7554/eLife.90006)
Supplement: Figure 2—source data 4. [file elife-90006-fig2-data4.xlsx]

## Sheet: Fig 2H
Ductal Area/Islet Area %
Control (n= 18)					Mutant (n= 21)
islet number	Area(µm^2)	Total duct area(µm^2)	duct/islet(%)		islet number	Area(µm^2)	Total duct area(µm^2)	duct area/islet(%)
1	750.019	84.1799	11.2237		1	5403.02	633.101	11.7175
2	1733.51	0	0		2	15373.5	1653.6	10.7562
3	3659.14	0	0		3	6271.86	777.884	12.4028
4	9480.52	181.768	1.91728		4	11266.8	1004.76	8.91792
5	5315.43	102.09	1.92064		5	6950.66	143.282	2.06141
6	1205.29	51.5051	4.27326		6	5477.52	946.433	17.2785
7	3198.79	78.8067	2.46364		7	1067.54	497.952	46.6446
8	14248.4	25.4137	0.178362		8	2862.49	137.328	4.7975
9	9725.17	76.0475	0.781966		9	3813.76	92.2617	2.41918
10	25330.6	0	0		10	2964.67	161.676	5.45342
11	12664.2	0	0		11	1289.78	158.481	12.2875
12	10576.9	0	0		12	3160.71	163.37	5.16877
13	18292.8	0	0		13	1028.05	61.524	5.98456
14	1213.81	0	0		14	3272.58	81.5156	2.49087
15	2563.25	0	0		15	583.001	208.775	35.8104
16	8462.62	0	0		16	3693.37	642.444	17.3945
17	2504.87	0	0		17	507.052	81.0316	15.9809
18	1842.13	0	0		18	3561.86	852.332	23.9294
Total:	132768	599.812	0.451776		19	1324.82	750.05	56.6151
					20	1699.53	137.182	8.07177
					21	1744.55	225.669	12.9356
					Total:	83317.1	9410.65	11.295
