# Supplementary material for: Coordination between ECM and cell-cell adhesion regulates the development of islet aggregation, architecture, and functional maturation
Source: eLife. 2023 Aug 23;12:e90006. doi: 10.7554/eLife.90006 (PMC10482429; doi:10.7554/eLife.90006)
Supplement: Figure 2—source data 5. [file elife-90006-fig2-data5.xlsx]

## Sheet: Fig 2N
Aggregate Size after 2 hour incubation
(n = 36)			(n = 27)			(n = 27)			(n = 27)
Control without ECM			Mutant without ECM			Control with ECM			Mutant with ECM
	Aggregate Size (μm^2)			Aggregate Size (μm^2)			Aggregate Size (μm^2)			Aggregate Size (μm^2)
1	676		1	6731.55		1	252		1	2147.71
2	676		2	5124.24		2	248		2	1738.94
3	524		3	4381.56		3	176		3	1664.1
4	504		4	11438		4	244		4	1699.26
5	504		5	5301.03		5	244		5	1451.16
6	488		6	5179.73		6	236		6	1381.8
7	1116		7	11388.3		7	260		7	1887.35
8	700		8	10082		8	232		8	1474.39
9	692		9	8244.66		9	228		9	1415.67
10	1404		10	844.307		10	1158.87		10	680.414
11	836		11	769.136		11	919.16		11	628.149
12	620		12	644.603		12	782.36		12	549.106
13	1044		13	1626.02		13	485.55		13	917.865
14	976		14	1400.51		14	427.8		14	705.579
15	708		15	1382.77		15	360.37		15	686.866
16	3872		16	1290.17		16	367.15		16	389.407
17	1448		17	943.998		17	329.4		17	386.826
18	1244		18	882.054		18	322.95		18	276.811
19	2826.51		19	7681.68		19	537.17		19	374.57
20	2064.15		20	4307.03		20	496.2		20	269.39
21	2008.01		21	3790.19		21	423.28		21	242.29
22	2327.73		22	17208.8		22	306.82		22	352.95
23	2120.93		23	7049.01		23	295.52		23	241
24	1590.86		24	2972.98		24	259.07		24	221.97
25	2715.53		25	9082.83		25	306.82		25	249.07
26	2445.81		26	5344.27		26	295.52		26	245.19
27	2244.17		27	3344.64		27	259.07		27	242.29
28	5547.84
29	4253.15
30	3065.25
31	15537.2
32	4047.64
33	2902
34	13891.2
35	12396.2
36	7296.46
