# Supplementary material for: Coordination between ECM and cell-cell adhesion regulates the development of islet aggregation, architecture, and functional maturation
Source: eLife. 2023 Aug 23;12:e90006. doi: 10.7554/eLife.90006 (PMC10482429; doi:10.7554/eLife.90006)
Supplement: Figure 3—figure supplement 1—source data 1. [file elife-90006-fig3-figsupp1-data1.xlsx]

## Sheet: Suppl 3-1C
Frequency
Control (n= 3)	ISLET SIZE	Range	fi (absolute)	Fi (relative)		Mutant (= 3)	ISLET SIZE	Range	fi (absolute)	Fi (relative)
	WT053	0	0	0			MUT053	0	0	0
		500	0	0				500	3	0.0192308
		5000	53	0.557895				5000	115	0.737179
		10000	19	0.2				10000	25	0.160256
		>10000	23	0.242105				>10000	13	0.0833333
			95	1					156	1
								Range	fi (absolute)	Fi (relative)
	WT054	Range	fi (absolute)	Fi (relative)			MUT054	0	0	0
		0	0	0				500	3	0.0185185
		500	2	0.04				5000	122	0.753086
		5000	26	0.52				10000	25	0.154321
		10000	7	0.14				>10000	12	0.0740741
		>10000	15	0.3
									162	1
			50	1
								Range	fi (absolute)	Fi (relative)
							MUT055	0	0	0
	WT055	Range	fi (absolute)	Fi (relative)				500	0	0
		0	0	0				5000	47	0.691176
		500	3	0.0461538				10000	14	0.205882
		5000	38	0.584615				>10000	7	0.102941
		10000	8	0.123077
		>10000	16	0.246154
									68	1
			65	1
