# Supplementary material for: Coordination between ECM and cell-cell adhesion regulates the development of islet aggregation, architecture, and functional maturation
Source: eLife. 2023 Aug 23;12:e90006. doi: 10.7554/eLife.90006 (PMC10482429; doi:10.7554/eLife.90006)
Supplement: Figure 3—source data 1. [file elife-90006-fig3-data1.xlsx]

## Sheet: Fig 3C
Islet area/ Pancreas area
Control (n= 3)			%			Mutant (n= 3)			%
	Pancreas area (um)	ChrA Area (um)	Islet area				Pancreas area (um)	ChrA Area (um)	Islet area
1	828390	2153.81	0.259999			1	873793	9564.92	1.13122
2	561128	5129.18	0.914084			2		319.583
3	1.01236e+06	1067.17	0.218351			3	837457	1048.71	0.125226
4		1143.33				4	817828	920.926	0.112606
5	1.09465e+06	3612.47	0.33001			5	507456	884.444	0.17429
6	1.03644e+06	1443.88	0.139311			6	698543	4288.66	0.976181
7	1.21916e+06	3053.81	0.250484			7		2530.38
8	886234	11547.2	1.30295			8	586551	643.597	0.109726
9	648789	1611.21	0.422215			9	64319.3	934.53	1.45295
10		1128.07				10	875463	5383.54	0.836294
11	1.04475e+06	998.872	0.209147			11		1937.9
12		1186.2				12	740382	739.235	0.0998451
13	953661	36048.5	4.2514			13	576556	889.7	0.154313
14		1350.78				14	771635	1995.31	0.805047
15		1631.41				15		2702.59
16		1513.3				16		1514.13
17	1.00368e+06	3384.53	1.08632			17	598488	1446.73	0.36065
18		7518.7				18		711.718
19	1.01898e+06	2996.31	0.294049			19	935001	2449.85	0.403938
20	1.22507e+06	21967.9	2.69411			20		1326.97
21		11036.8				21	1.0243e+06	10559.6	2.86653
22	992379	5294.09	0.84169			22		8067.9
23		2437.22				23		7170.41
24		621.44				24		3564.05
25	1.05577e+06	2003.55	0.402413			25	859818	849.095	0.219428
26		2245.02				26		1037.59
27	1.15434e+06	44456.3	4.57021			27	961817	1021.51	0.106206
28		7069.47				28	898037	2022.2	0.342866
29		1229.89				29		1056.86
30	1.14087e+06	6330.54	1.03966			30	628638	2392.39	0.380567
31		841.572				31	283560	1307.29	0.461028
32		2528.01				32	1.01441e+06	7322.27	1.90348
33		2161.02				33		4796.53
34	1.11149e+06	4446.33	0.537907			34		1434.57
35		1532.47				35		971.94
36	1.18405e+06	27172.4	6.7483			36		1270.91
37		34637.5				37		1714.89
38		9755.47				38		974.31
39		8337.6				39		823.743
40	1.08033e+06	7888.37	2.80171			40	874789	3811.29	1.16363
41		11928.6				41		4400.78
42		8821.97				42		1967.24
43		1628.93				43	1.03445e+06	6497.81
44	1.17356e+06	7066.89	1.49395			44		1376.96
45		7116.36				45		2622.62
46		1706.74				46	794296	960.191	1.23335
47		1642.44				47		1821.55
48	1.00094e+06	2727.12	0.272457			48		7014.74
49	947590	1042.33	0.109998			49	990181	2331.89	0.320566
50	988712	37381.7	4.11078			50		842.293
51		2546.53				51	794296	14009.1	5.90714
52		715.532				52		5921.2
53	988712	5780.63	5.3724			53		6408.56
54		39584.3				54		8904.52
55		7752.64				55		8586.9
56	1.07103e+06	1287.09	0.343219			56		1830.38
57		2388.88				57		1259.57
58	1.18938e+06	632.055	3.21424			58	992486	3158.73	1.51248
59		17455.1				59		3745.02
60		20142.2				60		3358.14
61	695959	33923.2	4.87431			61		3830.77
62	1.09215e+06	3827.88	0.546512			62		918.453
63		1380.05				63	1.14785e+06	3805.62
64		760.774				64		4454.48
65	738105	1998.91	0.270817			65		1618.73
66	1.03194e+06	10868.2	9.00293			66		1602.04
67		82036.7				67		1465.48
68	833092	1186.71	1.57838			68		889.288
69		1294.61				69	709743	2869.86	1.31618
70		10668				70		1770.23
71	1.03194e+06	17200	2.49046			71		3154.71
72		8500.12				72		1546.69
73	994525	3285.8	0.448936			73	685930	2311.49	1.38548
74		1178.98				74		1871.02
75	1.09555e+06	106597	9.82929			75		4528.06
76		1087.26				76		792.825
77	1.01351e+06	10512.4	5.49878			77	735760	592.068	0.219658
78		24101.8				78		453.661
79		3892.29				79		570.426
80		13408.8				80	996049	7944.84	5.59447
81		3815.62				81		4152.52
82	1.01351e+06	22818.3	3.30896			82		35292.2
83		7458.1				83		3173.47
84		1744.67				84		1718.08
85		1515.78				85		3442.55
86	1.13935e+06	13015.3	1.90746			86	936024	3969.07	0.768049
87		7170.67				87		1111.79
88		1546.69				88		958.336
89	605619	6253.66	1.29434			89		1149.92
90		1585.14				90	1.06697e+06	14023.1	2.21791
91	1.01351e+06	5541.74	2.24309			91		8489.09
92		9935.6				92		1152.29
93		3728.43				93	1.10192e+06	9236.47	4.98142
94		1866.9				94		2617.36
95		1661.4				95		7827.36
96	451619	2357.97	0.915867			96		7632.78
97		1157.75				97		13848.6
98		620.512				98		3161.1
99	575731	6554.08	1.74937			99		2041.68
100		3517.58				100		904.54
101	584113	17668.4	3.02482			101		7143.57
102	883585	487.464	0.474581			102		477.88
103		3705.86				103	966484	4434.89	2.66743
104	488457	17421.3	3.56661			104		1279.77
105	551442	4363.78	2.02374			105		16184.9
106		6795.95				106		1891.94
107	745946	10813.6	1.44965			107		863.729
108	715310	2267.28	0.316964			108		1124.98
109	629515	690.385	0.109669			109	1.02296e+06	7094.31	2.32
110	592388	10146.5	1.71281			110		4381
111	316775	2575.21	0.812948			111		2725.78
112	961072	26381.8	2.74504			112		1197.53
113	324164	475.407	0.146656			113		7311.24
114	924706	5337.89	0.577253			114		1022.75
115	957132	7811.59	0.816146			115	949420	1797.13	0.343794
116	746876	1440.54	0.192876			116		897.12
117	235431	708.627	0.300992			117		569.808
118	731268	1412.51	0.193159			118	563796	2373.53	0.671125
119	1.02864e+06	23611.7	2.72296			119		1410.25
120		3133.58				120	977535	839.614	0.0858909
121		1264.11				121	692172	23005.2	5.97147
122	165638	1773.73	1.07085			122		1578.64
123	1.11019e+06	27610.4	5.28671			123		2020.04
124		31082.4				124		2327.26
125	645354	3533.14	0.547473			125		2899.02
126	1.15052e+06	31364.5	2.72611			126		4335.55
127	735195	13597.3	1.84948			127		1780.64
128	524191	4027.82	0.768387			128		1447.55
129	1.08182e+06	15024.9	1.43742			129		869.191
130		525.39				130		1069.74
131	829415	2308.4	0.542828			131	692172	16367.1	9.47697
132		2193.9				132		3499.13
133	592275	1519.8	0.256603			133		1620.38
134	690693	21668.2	3.13716			134		12793.5
135	1.01833e+06	3395.86	0.333473			135		4017.92
136	549582	3022.49	0.549961			136		5700.03
137	931297	2076.82	0.598147			137		14075.7
138		3493.7				138		2672.29
139	1.11181e+06	13000	3.38566			139		2487.82
140		9613.87				140		2363.12
141		5584.3				141	1.18331e+06	6970.12	6.2224
142		7962.57				142		4361.93
143		1481.15				143		7563.53
144	1.09274e+06	21449.3	3.33643			144		12969.8
145		15009.2				145		7711.52
146	861214	775.305	2.7347			146		3523.24
147		2513.17				147		4371.31
148		1795.89				148		1638.42
149		826.834				149		15697.4
150		2261.4				150		6343.22
151		15379				151		2479.58
152	1.0784e+06	684.82	0.399998			152	1.01949e+06	4172.82	3.11166
153		3628.78				153		1197.33
154	1.16731e+06	13674	1.51781			154		8718.6
155		1874.21				155		16140.8
156		2169.16				156		1493.52
157	419350	7481.8	1.78414			157	966628	6255.31	0.880211
158	830125	290.383	0.249321			158		1140.03
159		354.623				159		1113.03
160		877.333				160	696830	800.039	0.114811
161		547.341				161	625336	4698.21	1.0411
162	1.06391e+06	13083.4	6.11246			162		918.659
163		39327.7				163		504.572
164		11140.4				164		388.941
165		1479.91				165	740815	1737.25	0.394417
166	850376	2042.71	0.240213			166		754.694
167	445739	2181.43	0.489396			167		429.958
168	955955	9991.99	1.60168			168	768091	3489.75	0.454341
169		3616.31				169	1.04627e+06	1319.86	0.985356
170		685.233				170		298.25
171		1017.8				171		2272.02
172	850816	7130.48	0.838076			172		4827.55
173	588411	1104.27	0.187669			173		1008.73
174	1.0036e+06	7277.75	0.85108			174		583.102
175		1263.7				175	721774	1579.36	0.30336
176	669019	12453.1	2.46075			176		610.206
177		1041.19				177	947626	12783.6	2.02441
178		2968.59				178		6400.21
179	875015	3157.59	0.457876			179	1.12603e+06	3134.3	1.18127
180		848.889				180		8045.43
181	1.08225e+06	8754.47	1.27294			181		2121.66
182		5022.02				182	1.05954e+06	4175.09	2.55529
183	1.15934e+06	40741	3.67366			183		1574.42
184		1849.07				184		4682.75
185	878318	18458.6	2.10159			185		3619.5
186	661581	38308.9	6.15028			186		4636.58
187		2380.12				187		1914.71
188	548706	4217.24	0.768579			188		2753.3
189	845486	5990.97	0.708583			189		2972.61
190	716656	1193.41	0.576036			190		745.316
191		1163.83				191	1.02385e+06	30257.2	3.83547
192		771.904				192		9012.11
193		999.044				193	1.19613e+06	2512.45	0.779588
194	951599	3178.41	0.670733			194		2783.15
195		2610.25				195		3052.58
196		594.026				196		976.681
197	1.00495e+06	7765.73	1.78067			197	881563	932.366	0.222211
198		10129.1				198		1026.56
199	945017	41624.1	4.40459			199	1.06737e+06	793.959	0.664163
200	498630	2144.95	0.507653			200		1515.67
201		386.364				201		777.676
202	818975	3918.78	0.668639			202		4001.74
203		1557.21				203	566675	658.438	0.489706
204	1.17908e+06	21513.4	4.7277			204		1278.54
205		23834.6				205		838.068
206		10395.3				206	943938	3842.83	3.69055
207	1.18112e+06	22970.2	3.72717			207		23833.6
208		17759.5				208		1255.45
209		3292.5				209		500.656
210	816102	1588.95	0.1947			210		5403.95
						211	469548	5196.7	1.47398
						212		1724.37
						213	1.09604e+06	15104.5	2.84779
						214		3565.29
						215		1320.38
						216		4425.1
						217		5132.39
						218		1665.31
						219	1.02082e+06	681.316	1.47105
						220		2425.68
						221		11909.8
						222	937518	1565.14	0.265593
						223		924.842
						224	865792	17073.7	1.97204
						225	591445	1471.57	0.37357
						226		737.895
						227	937576	4974.4	0.756368
						228		1147.96
						229		969.157
						230	338814	733.567	0.658869
						231		815.807
						232		682.965
						233	754512	6602.2	0.954975
						234		603.198
						235	716608	1443.95	0.728373
						236		1275.55
						237		586.297
						238		1913.79
						239	828309	520.855	0.393639
						240		1236.9
						241		1502.79
						242	910897	5283.78	0.580064
						243	1.02425e+06	2190.29	2.84291
						244		4558.98
						245		7621.76
						246		9242.45
						247		3440.28
						248		1510.32
						249		554.452
						250	1.03142e+06	1098.39	0.765485
						251		1516.91
						252		2200.08
						253		3079.99
						254	1.00824e+06	1416.12	0.585197
						255		3833.96
						256		650.09
						257	521991	2202.97	0.725979
						258		1586.58
						259	800554	9572.85	3.18287
						260		9861.21
						261		6046.52
						262	746518	11045.7	3.82236
						263		7164.39
						264		2010.46
						265		1761.26
						266		6552.84
						267	769392	6772.66	2.19578
						268		4243.1
						269		2230.79
						270		3647.63
						271	680066	2362.81	1.4491
						272		1980.26
						273		4676.26
						274		835.491
						275	754574	611.031	0.0809769
						276	1.01577e+06	35267.4	5.52596
						277		4214.76
						278		8018.63
						279		3035.68
						280		1696.85
						281		3897.86
						282	917864	3289.82	0.482311
						283		1137.14
						284	1.04415e+06	14954	2.32861
						285		8150.44
						286		1209.69
						287	1.09032e+06	9483.81	5.03467
						288		2684.66
						289		7826.64
						290		7894.55
						291		13895
						292		1933.47
						293		3285.49
						294		886.196
						295		7004.34
						296	967426	16629.2	2.55879
						297		4768.18
						298		1296.26
						299		2060.75
						300	1.01723e+06	4366.05	2.09507
						301		2699.09
						302		6887.47
						303		7358.96
						304	937709	1747.04	0.284937
						305		924.842
						306	562238	2350.34	0.651484
						307		1312.55
						308	978159	830.132	0.0848668
						309	281778	1238.24	0.439439
						310	536107	13506.3	2.77772
						311		1385.31
						312	633434	908.044	0.665237
						313		3305.79
						314	600640	1161.88	0.430324
						315		1422.82
						316	557963	1840.62	0.719681
						317		1032.64
						318		1142.29
						319	712758	4873.72	2.55348
						320		5805.67
						321		7520.76
						322	244801	555.586	0.226954
						323	872465	630.303	0.0722439
						324	1.02199e+06	3525.72	0.344987
						325	506016	2410.42	4.16168
						326		3272.92
						327		12085.4
						328		1522.48
						329		1767.55
						330	733700	11588.6	3.65422
						331		6833.78
						332		8388.72
						333	771661	3518.71	0.455992
						334	1.17045e+06	9319.23	0.96449
						335		1969.64
						336	1.14648e+06	5292.54	0.636455
						337		1438.79
						338		565.479
						339	468867	1764.77	0.37639
						340	1.0346e+06	3310.94	0.320022
						341	835616	14136.7	5.96019
						342		5944.69
						343		10469.2
						344		11266.3
						345		4778.8
						346		3208.57
						347	311901	4184.26	1.34153
						348	920274	1144.56	0.124372
						349	841354	2996	0.760312
						350		3400.91
						351	847271	15009.9	2.31416
						352		1847.11
						353		2750.21
						354	933324	5402.92	1.42881
						355		5101.58
						356		1081.08
						357		978.124
						358		771.698
						359	556119	966.581	0.173808
						360	1.07431e+06	1712	0.390339
						361		597.324
						362		1884.11
						363	832242	6230.47	3.46375
						364		1677.48
						365		3776.25
						366		14790.7
						367		1387.68
						368		964.211
						369	424164	7540.96	2.28346
						370		2144.64
						371	743904	5387.67	2.20844
						372		1025.63
						373		9236.78
						374		778.603
						375	353681	2715.27	1.22828
						376		701.722
						377		927.213
						378	687342	3622.96	1.92042
						379		1069.43
						380		3133.58
						381		936.076
						382		4437.78
						383	691030	5292.85	1.0983
						384		683.687
						385		963.592
						386		649.471
