# Supplementary material for: Coordination between ECM and cell-cell adhesion regulates the development of islet aggregation, architecture, and functional maturation
Source: eLife. 2023 Aug 23;12:e90006. doi: 10.7554/eLife.90006 (PMC10482429; doi:10.7554/eLife.90006)
Supplement: Figure 3—source data 2. [file elife-90006-fig3-data2.xlsx]

## Sheet: Fig 3D
Average Islet Size
Control (n= 3)			Mutant (n= 3)
	ChrA Area (um)			ChrA Area (um)
1	2153.81		1	9564.92
2	5129.18		2	319.583
3	1067.17		3	1048.71
4	1143.33		4	920.926
5	3612.47		5	884.444
6	1443.88		6	4288.66
7	3053.81		7	2530.38
8	11547.2		8	643.597
9	1611.21		9	934.53
10	1128.07		10	5383.54
11	998.872		11	1937.9
12	1186.2		12	739.235
13	36048.5		13	889.7
14	1350.78		14	1995.31
15	1631.41		15	2702.59
16	1513.3		16	1514.13
17	3384.53		17	1446.73
18	7518.7		18	711.718
19	2996.31		19	2449.85
20	21967.9		20	1326.97
21	11036.8		21	10559.6
22	5294.09		22	8067.9
23	2437.22		23	7170.41
24	621.44		24	3564.05
25	2003.55		25	849.095
26	2245.02		26	1037.59
27	44456.3		27	1021.51
28	7069.47		28	2022.2
29	1229.89		29	1056.86
30	6330.54		30	2392.39
31	841.572		31	1307.29
32	2528.01		32	7322.27
33	2161.02		33	4796.53
34	4446.33		34	1434.57
35	1532.47		35	971.94
36	27172.4		36	1270.91
37	34637.5		37	1714.89
38	9755.47		38	974.31
39	8337.6		39	823.743
40	7888.37		40	3811.29
41	11928.6		41	4400.78
42	8821.97		42	1967.24
43	1628.93		43	6497.81
44	7066.89		44	1376.96
45	7116.36		45	2622.62
46	1706.74		46	960.191
47	1642.44		47	1821.55
48	2727.12		48	7014.74
49	1042.33		49	2331.89
50	37381.7		50	842.293
51	2546.53		51	14009.1
52	715.532		52	5921.2
53	5780.63		53	6408.56
54	39584.3		54	8904.52
55	7752.64		55	8586.9
56	1287.09		56	1830.38
57	2388.88		57	1259.57
58	632.055		58	3158.73
59	17455.1		59	3745.02
60	20142.2		60	3358.14
61	33923.2		61	3830.77
62	3827.88		62	918.453
63	1380.05		63	3805.62
64	760.774		64	4454.48
65	1998.91		65	1618.73
66	10868.2		66	1602.04
67	82036.7		67	1465.48
68	1186.71		68	889.288
69	1294.61		69	2869.86
70	10668		70	1770.23
71	17200		71	3154.71
72	8500.12		72	1546.69
73	3285.8		73	2311.49
74	1178.98		74	1871.02
75	106597		75	4528.06
76	1087.26		76	792.825
77	10512.4		77	592.068
78	24101.8		78	453.661
79	3892.29		79	570.426
80	13408.8		80	7944.84
81	3815.62		81	4152.52
82	22818.3		82	35292.2
83	7458.1		83	3173.47
84	1744.67		84	1718.08
85	1515.78		85	3442.55
86	13015.3		86	3969.07
87	7170.67		87	1111.79
88	1546.69		88	958.336
89	6253.66		89	1149.92
90	1585.14		90	14023.1
91	5541.74		91	8489.09
92	9935.6		92	1152.29
93	3728.43		93	9236.47
94	1866.9		94	2617.36
95	1661.4		95	7827.36
96	2357.97		96	7632.78
97	1157.75		97	13848.6
98	620.512		98	3161.1
99	6554.08		99	2041.68
100	3517.58		100	904.54
101	17668.4		101	7143.57
102	487.464		102	477.88
103	3705.86		103	4434.89
104	17421.3		104	1279.77
105	4363.78		105	16184.9
106	6795.95		106	1891.94
107	10813.6		107	863.729
108	2267.28		108	1124.98
109	690.385		109	7094.31
110	10146.5		110	4381
111	2575.21		111	2725.78
112	26381.8		112	1197.53
113	475.407		113	7311.24
114	5337.89		114	1022.75
115	7811.59		115	1797.13
116	1440.54		116	897.12
117	708.627		117	569.808
118	1412.51		118	2373.53
119	23611.7		119	1410.25
120	3133.58		120	839.614
121	1264.11		121	23005.2
122	1773.73		122	1578.64
123	27610.4		123	2020.04
124	31082.4		124	2327.26
125	3533.14		125	2899.02
126	31364.5		126	4335.55
127	13597.3		127	1780.64
128	4027.82		128	1447.55
129	15024.9		129	869.191
130	525.39		130	1069.74
131	2308.4		131	16367.1
132	2193.9		132	3499.13
133	1519.8		133	1620.38
134	21668.2		134	12793.5
135	3395.86		135	4017.92
136	3022.49		136	5700.03
137	2076.82		137	14075.7
138	3493.7		138	2672.29
139	13000		139	2487.82
140	9613.87		140	2363.12
141	5584.3		141	6970.12
142	7962.57		142	4361.93
143	1481.15		143	7563.53
144	21449.3		144	12969.8
145	15009.2		145	7711.52
146	775.305		146	3523.24
147	2513.17		147	4371.31
148	1795.89		148	1638.42
149	826.834		149	15697.4
150	2261.4		150	6343.22
151	15379		151	2479.58
152	684.82		152	4172.82
153	3628.78		153	1197.33
154	13674		154	8718.6
155	1874.21		155	16140.8
156	2169.16		156	1493.52
157	7481.8		157	6255.31
158	290.383		158	1140.03
159	354.623		159	1113.03
160	877.333		160	800.039
161	547.341		161	4698.21
162	13083.4		162	918.659
163	39327.7		163	504.572
164	11140.4		164	388.941
165	1479.91		165	1737.25
166	2042.71		166	754.694
167	2181.43		167	429.958
168	9991.99		168	3489.75
169	3616.31		169	1319.86
170	685.233		170	298.25
171	1017.8		171	2272.02
172	7130.48		172	4827.55
173	1104.27		173	1008.73
174	7277.75		174	583.102
175	1263.7		175	1579.36
176	12453.1		176	610.206
177	1041.19		177	12783.6
178	2968.59		178	6400.21
179	3157.59		179	3134.3
180	848.889		180	8045.43
181	8754.47		181	2121.66
182	5022.02		182	4175.09
183	40741		183	1574.42
184	1849.07		184	4682.75
185	18458.6		185	3619.5
186	38308.9		186	4636.58
187	2380.12		187	1914.71
188	4217.24		188	2753.3
189	5990.97		189	2972.61
190	1193.41		190	745.316
191	1163.83		191	30257.2
192	771.904		192	9012.11
193	999.044		193	2512.45
194	3178.41		194	2783.15
195	2610.25		195	3052.58
196	594.026		196	976.681
197	7765.73		197	932.366
198	10129.1		198	1026.56
199	41624.1		199	793.959
200	2144.95		200	1515.67
201	386.364		201	777.676
202	3918.78		202	4001.74
203	1557.21		203	658.438
204	21513.4		204	1278.54
205	23834.6		205	838.068
206	10395.3		206	3842.83
207	22970.2		207	23833.6
208	17759.5		208	1255.45
209	3292.5		209	500.656
210	1588.95		210	5403.95
			211	5196.7
			212	1724.37
			213	15104.5
			214	3565.29
			215	1320.38
			216	4425.1
			217	5132.39
			218	1665.31
			219	681.316
			220	2425.68
			221	11909.8
			222	1565.14
			223	924.842
			224	17073.7
			225	1471.57
			226	737.895
			227	4974.4
			228	1147.96
			229	969.157
			230	733.567
			231	815.807
			232	682.965
			233	6602.2
			234	603.198
			235	1443.95
			236	1275.55
			237	586.297
			238	1913.79
			239	520.855
			240	1236.9
			241	1502.79
			242	5283.78
			243	2190.29
			244	4558.98
			245	7621.76
			246	9242.45
			247	3440.28
			248	1510.32
			249	554.452
			250	1098.39
			251	1516.91
			252	2200.08
			253	3079.99
			254	1416.12
			255	3833.96
			256	650.09
			257	2202.97
			258	1586.58
			259	9572.85
			260	9861.21
			261	6046.52
			262	11045.7
			263	7164.39
			264	2010.46
			265	1761.26
			266	6552.84
			267	6772.66
			268	4243.1
			269	2230.79
			270	3647.63
			271	2362.81
			272	1980.26
			273	4676.26
			274	835.491
			275	611.031
			276	35267.4
			277	4214.76
			278	8018.63
			279	3035.68
			280	1696.85
			281	3897.86
			282	3289.82
			283	1137.14
			284	14954
			285	8150.44
			286	1209.69
			287	9483.81
			288	2684.66
			289	7826.64
			290	7894.55
			291	13895
			292	1933.47
			293	3285.49
			294	886.196
			295	7004.34
			296	16629.2
			297	4768.18
			298	1296.26
			299	2060.75
			300	4366.05
			301	2699.09
			302	6887.47
			303	7358.96
			304	1747.04
			305	924.842
			306	2350.34
			307	1312.55
			308	830.132
			309	1238.24
			310	13506.3
			311	1385.31
			312	908.044
			313	3305.79
			314	1161.88
			315	1422.82
			316	1840.62
			317	1032.64
			318	1142.29
			319	4873.72
			320	5805.67
			321	7520.76
			322	555.586
			323	630.303
			324	3525.72
			325	2410.42
			326	3272.92
			327	12085.4
			328	1522.48
			329	1767.55
			330	11588.6
			331	6833.78
			332	8388.72
			333	3518.71
			334	9319.23
			335	1969.64
			336	5292.54
			337	1438.79
			338	565.479
			339	1764.77
			340	3310.94
			341	14136.7
			342	5944.69
			343	10469.2
			344	11266.3
			345	4778.8
			346	3208.57
			347	4184.26
			348	1144.56
			349	2996
			350	3400.91
			351	15009.9
			352	1847.11
			353	2750.21
			354	5402.92
			355	5101.58
			356	1081.08
			357	978.124
			358	771.698
			359	966.581
			360	1712
			361	597.324
			362	1884.11
			363	6230.47
			364	1677.48
			365	3776.25
			366	14790.7
			367	1387.68
			368	964.211
			369	7540.96
			370	2144.64
			371	5387.67
			372	1025.63
			373	9236.78
			374	778.603
			375	2715.27
			376	701.722
			377	927.213
			378	3622.96
			379	1069.43
			380	3133.58
			381	936.076
			382	4437.78
			383	5292.85
			384	683.687
			385	963.592
			386	649.471
