# Supplementary material for: Coordination between ECM and cell-cell adhesion regulates the development of islet aggregation, architecture, and functional maturation
Source: eLife. 2023 Aug 23;12:e90006. doi: 10.7554/eLife.90006 (PMC10482429; doi:10.7554/eLife.90006)
Supplement: Figure 3—source data 3. [file elife-90006-fig3-data3.xlsx]

## Sheet: Fig 3J
Islet Blood vessel density
		Islet	Number of BV							Islet	Number of BV per area
Control (n= 3)		Area(µm^2)	BV in islet	BV on edge	all BV/area			Mutant (n= 3)		Area(µm^2)	BV in islet	BV on edge	all BV/area
	1	60292.8	32	17	0.000812701				1	35004.8	39	23	0.00177119
	2	16156.1	12	8	0.00123792				2	2355.72	2	3	0.00212249
	3	20549.2	12	11	0.00111927				3	3772.2	4	3	0.00185568
	4	56882.5	31	13	0.000773524				4	1699.64	1	2	0.00176508
	5	6402.58	2	3	0.000780935				5	23765.4	29	9	0.00159897
	6	15520.1	10	7	0.00109536				6	392.32	0	1	0.00254894
	7	23493.3	18	9	0.00114927				7	3377.61	3	3	0.0017764
	8	537.481	0	1	0.00186053				8	1789.3	1	3	0.00223551
	9	484.77	0	1	0.00206283				9	3802.38	2	2	0.00105197
	10	554.212	0	2	0.00360873				10	4168.72	5	3	0.00191905
	11	2070.08	2	0	0.000966146				11	4433.41	10	4	0.00315784
	12	2534.83	3	4	0.00276153				12	4781.1	4	3	0.0014641
	13	9790.62	10	9	0.00194063				13	6780.09	9	6	0.00221236
	14	375.183	1	1	0.00533074				14	8402.54	7	5	0.00142814
	15	599.581	2	2	0.00667132				15	2406.42	1	3	0.00166222
	16	2667.6	6	2	0.00299895				16	2529.09	3	4	0.00276779
	17	5104.51	6	7	0.00254677				17	11266	11	8	0.00168649
	18	320.004	1	0	0.00312496				18	11829.9	15	10	0.00211329
	19	16090.3	16	12	0.00174018				19	196.326	0	1	0.00509358
	20	11988.4	10	8	0.00150145				20	443.356	2	1	0.00676658
	21	1154.49	0	2	0.00173236				21	8522.88	11	8	0.00222929
	22	26086.9	18	12	0.00115				22	250.078	0	1	0.00399874
	23	821.73	1	3	0.00486778				23	274	0	0	0
	24	2225.34	3	2	0.00224685				24	329.139	0	0	0
	25	3021.16	2	4	0.001986				25	517.617	0	3	0.00579579
	26	9816.78	9	8	0.00173173				26	5145.63	6	5	0.00213773
	27	917.232	1	4	0.00545119				27	376.059	1	0	0.00265916
									28	11553.2	16	13	0.00251012
	28	2431.22	0	1	0.000411317				29	8722.33	9	6	0.00171972
	29	312.3	0	1	0.00320205				30	1404.99	2	4	0.00427049
	30	2070.38	3	3	0.00289802				31	728.011	1	2	0.00412082
	31	301.852	0	1	0.00331288				32	997.211	2	4	0.00601678
	32	18672.8	17	12	0.00155306				33	580.144	1	2	0.00517113
	33	10845.3	16	6	0.00202853				34	252.561	0	1	0.00395945
	34	6075.61	5	5	0.00164592				35	1211.33	1	3	0.00330214
	35	7908.62	5	9	0.00177022				36	2891.93	3	5	0.00276632
	36	7468.95	9	6	0.00200832				37	609.76	1	3	0.00655996
	37	2152.75	3	2	0.00232261				38	2264.36	7	3	0.00441627
	38	19217.3	20	13	0.00171721				39	365.083	0	1	0.0027391
	39	2707.95	5	4	0.00332355				40	557.333	1	2	0.00538278
	40	226.865	0	1	0.00440791				41	245.545	0	1	0.00407257
	41	966.229	1	2	0.00310485				42	395.428	0	2	0.00505781
	42	319.927	0	1	0.00312571				43	1299.25	3	1	0.00307869
	43	16319.2	16	9	0.00153194				44	7157.45	11	6	0.00237515
	44	406.726	0	3	0.00737598				45	274.59	0	2	0.00728359
	45	1943.38	2	3	0.00257283				46	4183.72	5	6	0.00262924
	46	2304.4	2	4	0.00260371				47	1538.61	2	2	0.00259975
	47	11451.4	12	5	0.00148453
	48	300.941	2	4	0.0199374				48	21515.5	22	9	0.00144082
	49	614.878	0	1	0.00162634				49	15019.3	19	10	0.00193085
	50	530.47	0	0	0				50	300.348	0	1	0.00332947
	51	6784.93	6	6	0.00176863				51	264.988	0	2	0.00754751
	52	2877.46	4	5	0.00312776				52	6083.35	8	5	0.00213698
	53	310.957	0	1	0.00321588				53	4584.21	6	5	0.00239954
	54	13847.1	13	8	0.00151657				54	253.267	0	1	0.0039484
	55	2338.47	3	3	0.00256578				55	734.613	1	2	0.00408379
	56	8268.85	8	8	0.00193497				56	2617.29	2	2	0.0015283
	57	5137.19	6	7	0.00253057				57	1834.37	3	3	0.00327088
	58	642.283	1	2	0.00467084				58	290.284	0	1	0.00344491
	59	49752.9	51	17	0.00136675				59	1541.62	3	1	0.00259467
	60	231.417	0	0	0				60	743.125	1	2	0.00403701
	61	535.381	0	1	0.00186783				61	1111.56	1	1	0.00179927
	62	211.63	1	2	0.0141757				62	734.34	1	1	0.00272353
	63	19719.5	23	10	0.00167347				63	215.119	0	0	0
	64	1867.32	1	3	0.00214211				64	808.22	0	2	0.00247457
	65	514.136	1	2	0.00583503				65	264.194	0	2	0.00757019
	66	1020.22	1	2	0.00294054				66	950.957	1	2	0.00315472
	67	14124.7	16	11	0.00191155				67	828.134	1	1	0.00241507
	68	10444.1	10	10	0.00191496				68	1689.28	0	5	0.00295985
	69	19638.1	21	10	0.00157856				69	325.286	0	1	0.00307422
	70	9536.85	13	6	0.00199227				70	10513.6	15	6	0.00199742
	71	268.157	0	1	0.00372916				71	427.106	0	3	0.00702401
	72	5189.62	6	5	0.00211962				72	1066.97	3	2	0.00468618
	73	1784.9	3	3	0.00336154				73	355.327	0	3	0.00844294
	74	760.49	0	4	0.00525977				74	469.154	0	2	0.00426299
	75	12497.5	17	6	0.00184037				75	791.645	0	1	0.00126319
	76	771.479	0	1	0.00129621				76	237.214	0	1	0.00421561
	77	23297.9	23	12	0.00150228				77	487.46	0	2	0.0041029
	78	407.643	0	1	0.00245313				78	220.647	0	0	0
	79	3502.38	4	7	0.00314072				79	1527.83	3	6	0.00589071
	80	2562.51	2	3	0.00195121				80	388.181	1	1	0.00515224
	81	1614.72	0	1	0.000619304				81	1808.03	2	3	0.00276544
	82	3932.29	2	3	0.00127152				82	521.937	0	4	0.00766376
	83	17406	22	13	0.0020108				83	1311.91	2	4	0.00457347
	84	1342.32	1	2	0.00223494				84	493.024	0	1	0.0020283
	85	1787.81	1	3	0.00223738				85	4705.64	8	9	0.00361269
	86	602.861	1	1	0.00331751				86	374.922	1	1	0.00533444
	87	749.147	1	1	0.0026697				87	1944.8	3	5	0.00411353
	88	14018.2	15	14	0.00206874				88	510.864	1	1	0.00391494
	89	37183.3	34	20	0.00145226				89	744.758	0	3	0.00402815
	90	400.93	0	2	0.00498841				90	227.856	0	1	0.00438873
	91	28073.5	23	14	0.00131797				91	229.769	1	2	0.0130566
	92	464.523	1	3	0.00861099				92	326.694	0	3	0.00918291
	93	1391.34	1	1	0.00143746				93	441.465	1	1	0.00453037
	94	503.06	0	2	0.00397567				94	231.197	0	0	0
	95	675.574	2	2	0.00592089				95	257.133	0	1	0.00388904
									96	286.56	0	1	0.00348967
									97	11940.4	9	18	0.00226124
									98	10656.5	13	6	0.00178296
									99	4606.21	6	5	0.00238808
									100	12986.6	22	13	0.0026951
									101	4280.56	6	6	0.00280337
									102	325.646	0	1	0.00307082
									103	233.118	0	2	0.00857934
									104	487.087	0	1	0.00205302
									105	298.854	0	3	0.0100383
									106	814.219	1	2	0.00368451
									107	408.671	1	1	0.00489391
									108	1300.14	3	2	0.00384574
									109	2948.93	2	4	0.00203464
									110	451.183	0	1	0.0022164
									111	1654.5	2	4	0.00362647
									112	209.405	1	1	0.00955088
									113	368.948	1	1	0.00542082
									114	4725.04	5	4	0.00190474
									115	1277.5	2	4	0.00469667
									116	422.641	1	1	0.00473215
									117	19147.1	29	15	0.00229799
									118	6746.58	8	6	0.00207513
									119	2224.98	3	5	0.00359554
									120	3278.03	7	8	0.00457591
									121	5549.11	4	6	0.00180209
									122	299.088	0	2	0.00668699
									123	1004.49	0	1	0.00099553
									124	409.007	0	0	0
									125	1478.82	1	0	0.000676217
									126	330.887	0	1	0.00302218
									127	3562.34	2	4	0.00168428
									128	367.648	0	1	0.00271999
									129	1088.15	2	4	0.00551394
									130	4338.63	4	5	0.00207439
									131	955.639	1	3	0.00418568
									132	291.448	1	2	0.0102934
									133	717.39	1	3	0.00557576
									134	958.359	1	4	0.00521725
									135	552.509	1	5	0.0108596
									136	274.336	0	1	0.00364517
									137	235.178	0	2	0.00850418
									138	2921.78	3	6	0.00308031
									139	307.591	0	1	0.00325107
									140	334.161	1	2	0.0089777
									141	2452.6	8	3	0.00448503
									142	1323.51	2	5	0.00528898
									143	471.869	0	2	0.00423847
									144	3492.82	3	5	0.00229041
									145	1215.01	1	3	0.00329216
									146	609.676	1	3	0.00656086
									147	684.176	0	1	0.00146161
									148	2306.56	3	0	0.00130064
									149	772.698	0	4	0.00517667
									150	2065.03	2	2	0.00193702
									151	305.575	1	1	0.00654503
									152	302.23	0	1	0.00330874
									153	4296.74	2	1	0.000698203
									154	11090.3	15	9	0.00216406
									155	3440.89	4	5	0.0026156
									156	554.546	1	2	0.00540983
									157	618.005	1	1	0.00323622
									158	391.701	1	1	0.00510594
									159	14344.3	23	6	0.0020217
									160	247.53	0	1	0.00403992
									161	2062.23	1	3	0.00193965
									162	323.911	0	1	0.00308726
									163	372.408	1	1	0.00537046
									164	299.626	0	1	0.0033375
									165	303.969	0	0	0
									166	2895.45	2	3	0.00172685
									167	486.774	0	2	0.00410868
									168	3994.97	6	7	0.00325409
									169	528.954	0	1	0.00189052
									170	294.505	0	1	0.00339553
									171	281.029	1	1	0.00711669
									172	1012.52	1	2	0.00296291
									173	651.42	1	3	0.00614043
									174	300.521	1	1	0.00665512
									175	392.079	1	2	0.00765151
									176	1001.7	0	2	0.0019966
									177	6334.12	9	5	0.00221025
									178	658.566	0	1	0.00151845
									179	12873.5	17	13	0.00233036
									180	429.2	1	1	0.00465983
									181	1185.95	1	3	0.00337281
									182	587.757	0	3	0.00510415
									183	1276.17	2	4	0.00470157
									184	540.537	0	1	0.00185001
									185	3048.63	4	4	0.00262413
									186	786.007	1	1	0.00254451
									187	813.816	0	1	0.00122878
									188	8285.34	13	10	0.00277599
									189	1272.8	1	4	0.00392836
									190	536.029	0	0	0
									191	5206.55	9	8	0.00326512
									192	2017.73	2	4	0.00297364
									193	675.717	0	2	0.00295982
									194	931.665	1	4	0.00536673
									195	260.513	1	4	0.0191929
									196	1815.2	6	5	0.00605993
									197	503.734	0	0	0
									198	1347.03	1	4	0.00371188
									199	1045.36	1	1	0.00191321
									200	447.543	0	2	0.00446885
									201	341.716	0	2	0.00585282
									202	8028.83	11	7	0.00224192
									203	10723.3	16	11	0.00251788
									204	426.153	0	2	0.00469315
