# Supplementary material for: Coordination between ECM and cell-cell adhesion regulates the development of islet aggregation, architecture, and functional maturation
Source: eLife. 2023 Aug 23;12:e90006. doi: 10.7554/eLife.90006 (PMC10482429; doi:10.7554/eLife.90006)
Supplement: Figure 4—figure supplement 1—source data 1. [file elife-90006-fig4-figsupp1-data1.xlsx]

## Sheet: Suppl 4-1A
qPCR Validation for Control vs Ngn3-Cre; Ctnna1 Mutant
Block Type	Fast 96-Well Block (0.1mL)
Calibration Background is expired	Yes
Calibration Background performed on	06-24-2021
Calibration Normalization FAM-ROX is expired	Yes
Calibration Normalization FAM-ROX performed on	06-24-2021
Calibration Normalization VIC-ROX is expired	Yes
Calibration Normalization VIC-ROX performed on	06-24-2021
Calibration Pure Dye FAM is expired	Yes
Calibration Pure Dye FAM performed on	06-24-2021
Calibration Pure Dye NED is expired	Yes
Calibration Pure Dye NED performed on	06-24-2021
Calibration Pure Dye ROX is expired	Yes
Calibration Pure Dye ROX performed on	06-24-2021
Calibration Pure Dye SYBR is expired	Yes
Calibration Pure Dye SYBR performed on	06-24-2021
Calibration Pure Dye TAMRA is expired	Yes
Calibration Pure Dye TAMRA performed on	06-24-2021
Calibration Pure Dye VIC is expired	Yes
Calibration Pure Dye VIC performed on	06-24-2021
Calibration ROI is expired	Yes
Calibration ROI performed on	06-24-2021
Calibration Uniformity is expired	Yes
Calibration Uniformity performed on	06-24-2021
Chemistry	SYBR_GREEN
Date Created	2023-03-02 20:19:45 PM PST
Experiment Barcode
Experiment Comment	Ctnna1_KO vs WT
Experiment File Name	D:\Users\Public\Documents\Ben Shih qPCR\2023-03-02 201946.eds
Experiment Name	2023-03-02 201946
Experiment Run End Time	2023-03-03 00:03:46 AM PST
Experiment Type	Comparative Cт (ΔΔCт)
Instrument Name	278862712
Instrument Serial Number	278862712
Instrument Type	QuantStudio(TM) 6 Flex System
Passive Reference	ROX
Quantification Cycle Method	Ct
Signal Smoothing On	true
Stage/ Cycle where Analysis is performed	Stage 2, Step 3
User Name
Well Position	Sample Name	Target Name	Reporter	RQ	RQ Min	RQ Max	CT	Ct Mean	Ct SD	Delta Ct Mean	Delta Ct SE	Ct Threshold	Baseline Start	Baseline End					Control (n= 4)
A1	WT_Control	Ctnna1	SYBR	1	0.830176	1.20456	26.3844	26.3704	0.0634512	4.18602	0.109735	0.215751	1	40						Ctnna1	Slc27a2	Etv1	Mafb	Arx	Peg10	Sst	Hk1	LdhA	Aldh1a1	Cxcl14	Cycloipin
A2	WT_Control	Slc27a2	SYBR	1	0.718144	1.39248	33.6901	33.4528	0.329063	11.2685	0.195207	0.203847	1	40					CT	26.384	33.69	28.842	26.471	30.595	30.012	18.847	31.172	29.372	32.597	32.786	22.302
A3	WT_Control	Etv1	SYBR	1	0.824015	1.21357	28.8417	28.7726	0.089212	6.58827	0.114127	0.100267	1	40						26.377	33.335	28.68	26.514	30.713	30.081	18.835	30.753	29.698	31.975	32.575	22.373
A4	WT_Control	Mafb	SYBR	1	0.749534	1.33416	26.4708	26.3107	0.267275	4.12632	0.169983	0.280021	1	40						26.436	33.745	28.856	26.33	30.347	29.846	18.846	30.056	29.22	31.841	31.931	22.165
A5	WT_Control	Arx	SYBR	1	0.786102	1.2721	30.5951	30.4943	0.190785	8.30998	0.141898	0.211492	1	40						26.284	33.041	28.713	25.928	30.322	29.682	18.725	29.572	28.398	31.44	31.486	21.897
A6	WT_Control	Peg10	SYBR	1	0.791452	1.2635	30.0123	29.9053	0.178672	7.72098	0.137899	0.221326	1	40
A7	WT_Control	Sst	SYBR	1	0.831004	1.20336	18.8473	18.8132	0.0592538	-3.37112	0.109147	0.225619	1	40
A8	WT_Control	Hk1	SYBR	1	0.532489	1.87797	31.1721	30.3881	0.712803	8.20376	0.371561	0.282186	1	40					Delta CT	4.082	11.388	6.539	4.168	8.293	7.71	-3.455	8.87	7.069	10.295	10.483
A9	WT_Control	LdhA	SYBR	1	0.60553	1.65145	29.3718	29.1719	0.552979	6.98757	0.295773	0.209652	1	40						4.004	10.963	6.307	4.142	8.34	7.708	-3.538	8.38	7.325	9.603	10.202
A10	WT_Control	Aldh1a1	SYBR	1	0.641293	1.55935	32.5975	31.9634	0.479906	9.77906	0.26194	0.206953	1	40						4.271	11.579	6.69	4.165	8.182	7.681	-3.32	7.89	7.055	9.675	9.765
A11	WT_Control	Cxcl14	SYBR	1	0.585153	1.70895	32.7859	32.1945	0.59596	10.0102	0.315955	0.192112	1	40						4.387	11.144	6.816	4.031	8.425	7.785	-3.172	7.675	6.501	9.543	9.59
A12	WT_Control	Cycloipin	SYBR				22.3025	22.1843	0.210097			0.135719	1	40					Delta Ct Mean	4.186	11.268	6.588	4.126	8.31	7.721	-3.371	8.204	6.988	9.779	10.01
B1	WT_Control	Ctnna1	SYBR	1	0.830176	1.20456	26.3767	26.3704	0.0634512	4.18602	0.109735	0.215751	1	40
B2	WT_Control	Slc27a2	SYBR	1	0.718144	1.39248	33.3352	33.4528	0.329063	11.2685	0.195207	0.203847	1	40
B3	WT_Control	Etv1	SYBR	1	0.824015	1.21357	28.6795	28.7726	0.089212	6.58827	0.114127	0.100267	1	40					DeltaDelta CT	-0.104	0.119	-0.049	0.042	-0.017	-0.011	-0.084	0.666	0.082	0.516	0.473
B4	WT_Control	Mafb	SYBR	1	0.749534	1.33416	26.5144	26.3107	0.267275	4.12632	0.169983	0.280021	1	40						-0.182	-0.306	-0.281	0.015	0.03	-0.013	-0.167	0.176	0.337	-0.177	0.192
B5	WT_Control	Arx	SYBR	1	0.786102	1.2721	30.7129	30.4943	0.190785	8.30998	0.141898	0.211492	1	40						0.085	0.311	0.102	0.038	-0.128	-0.04	0.052	-0.314	0.067	-0.104	-0.245
B6	WT_Control	Peg10	SYBR	1	0.791452	1.2635	30.081	29.9053	0.178672	7.72098	0.137899	0.221326	1	40						0.201	-0.124	0.228	-0.096	0.115	0.064	0.199	-0.529	-0.486	-0.236	-0.421
B7	WT_Control	Sst	SYBR	1	0.831004	1.20336	18.8351	18.8132	0.0592538	-3.37112	0.109147	0.225619	1	40
B8	WT_Control	Hk1	SYBR	1	0.532489	1.87797	30.7528	30.3881	0.712803	8.20376	0.371561	0.282186	1	40
B9	WT_Control	LdhA	SYBR	1	0.60553	1.65145	29.6977	29.1719	0.552979	6.98757	0.295773	0.209652	1	40					RQ	1.0748	0.9207	1.0345	0.9713	1.0121	1.0077	1.06	0.6303	0.9449	0.6993	0.7203
B10	WT_Control	Aldh1a1	SYBR	1	0.641293	1.55935	31.9752	31.9634	0.479906	9.77906	0.26194	0.206953	1	40						1.1344	1.2362	1.2154	0.9894	0.9793	1.0089	1.1223	0.8849	0.7914	1.1301	0.8753
B11	WT_Control	Cxcl14	SYBR	1	0.585153	1.70895	32.5751	32.1945	0.59596	10.0102	0.315955	0.192112	1	40						0.9428	0.8061	0.9316	0.9738	1.0929	1.0281	0.9649	1.2428	0.9546	1.0746	1.1849
B12	WT_Control	Cycloipin	SYBR				22.3727	22.1843	0.210097			0.135719	1	40						0.8699	1.0899	0.8537	1.0686	0.9232	0.9567	0.8712	1.4426	1.4008	1.1774	1.3385
C1	WT_Control	Ctnna1	SYBR	1	0.830176	1.20456	26.4364	26.3704	0.0634512	4.18602	0.109735	0.215751	1	40						1.0055	1.0132	1.0088	1.0008	1.0019	1.0004	1.0046	1.0502	1.0229	1.0204	1.0298
C2	WT_Control	Slc27a2	SYBR	1	0.718144	1.39248	33.7448	33.4528	0.329063	11.2685	0.195207	0.203847	1	40
C3	WT_Control	Etv1	SYBR	1	0.824015	1.21357	28.8558	28.7726	0.089212	6.58827	0.114127	0.100267	1	40
C4	WT_Control	Mafb	SYBR	1	0.749534	1.33416	26.33	26.3107	0.267275	4.12632	0.169983	0.280021	1	40
C5	WT_Control	Arx	SYBR	1	0.786102	1.2721	30.3472	30.4943	0.190785	8.30998	0.141898	0.211492	1	40
C6	WT_Control	Peg10	SYBR	1	0.791452	1.2635	29.8463	29.9053	0.178672	7.72098	0.137899	0.221326	1	40					Mutant (n= 4)
C7	WT_Control	Sst	SYBR	1	0.831004	1.20336	18.8458	18.8132	0.0592538	-3.37112	0.109147	0.225619	1	40
C8	WT_Control	Hk1	SYBR	1	0.532489	1.87797	30.0556	30.3881	0.712803	8.20376	0.371561	0.282186	1	40					CT	31.216	33.833	30.549	29.05	33.508	31.468	21.285	29.825	28.588	32.096	31.523	23.149
C9	WT_Control	LdhA	SYBR	1	0.60553	1.65145	29.2199	29.1719	0.552979	6.98757	0.295773	0.209652	1	40						31.45	33.286	30.184	29.036	32.776	31.539	21.322	29.806	28.708	31.995	31.432	23.254
C10	WT_Control	Aldh1a1	SYBR	1	0.641293	1.55935	31.8406	31.9634	0.479906	9.77906	0.26194	0.206953	1	40						31.293	33.408	30.274	28.807	32.518	31.503	21.236	29.845	28.896	31.805	31.704	23.13
C11	WT_Control	Cxcl14	SYBR	1	0.585153	1.70895	31.9308	32.1945	0.59596	10.0102	0.315955	0.192112	1	40						31.669	33.898	29.857	29.04	32.384	31.363	21.231	30.071	28.591	31.505	31.555	23.025
C12	WT_Control	Cycloipin	SYBR				22.1653	22.1843	0.210097			0.135719	1	40
D1	WT_Control	Ctnna1	SYBR	1	0.830176	1.20456	26.2839	26.3704	0.0634512	4.18602	0.109735	0.215751	1	40
D2	WT_Control	Slc27a2	SYBR	1	0.718144	1.39248	33.0412	33.4528	0.329063	11.2685	0.195207	0.203847	1	40					Delta CT	8.067	10.683	7.399	5.9	10.359	8.318	-1.865	6.676	5.438	8.947	8.373
D3	WT_Control	Etv1	SYBR	1	0.824015	1.21357	28.7133	28.7726	0.089212	6.58827	0.114127	0.100267	1	40						8.196	10.031	6.929	5.782	9.522	8.285	-1.932	6.551	5.454	8.74	8.177
D4	WT_Control	Mafb	SYBR	1	0.749534	1.33416	25.9275	26.3107	0.267275	4.12632	0.169983	0.280021	1	40						8.163	10.279	7.144	5.678	9.389	8.374	-1.893	6.715	5.767	8.676	8.574
D5	WT_Control	Arx	SYBR	1	0.786102	1.2721	30.3222	30.4943	0.190785	8.30998	0.141898	0.211492	1	40						8.645	10.873	6.832	6.016	9.36	8.338	-1.794	7.046	5.567	8.481	8.531
D6	WT_Control	Peg10	SYBR	1	0.791452	1.2635	29.6817	29.9053	0.178672	7.72098	0.137899	0.221326	1	40						8.268	10.467	7.076	5.844	9.657	8.329	-1.871	6.747	5.556	8.711	8.414
D7	WT_Control	Sst	SYBR	1	0.831004	1.20336	18.7247	18.8132	0.0592538	-3.37112	0.109147	0.225619	1	40
D8	WT_Control	Hk1	SYBR	1	0.532489	1.87797	29.572	30.3881	0.712803	8.20376	0.371561	0.282186	1	40
D9	WT_Control	LdhA	SYBR	1	0.60553	1.65145	28.3982	29.1719	0.552979	6.98757	0.295773	0.209652	1	40					DeltaDelta CT	3.881	-0.585	0.811	1.774	2.049	0.597	1.507	-1.528	-1.549	-0.832	-1.637
D10	WT_Control	Aldh1a1	SYBR	1	0.641293	1.55935	31.4403	31.9634	0.479906	9.77906	0.26194	0.206953	1	40						4.01	-1.237	0.341	1.656	1.212	0.564	1.439	-1.652	-1.534	-1.039	-1.833
D11	WT_Control	Cxcl14	SYBR	1	0.585153	1.70895	31.4864	32.1945	0.59596	10.0102	0.315955	0.192112	1	40						3.977	-0.99	0.556	1.551	1.079	0.653	1.478	-1.488	-1.221	-1.103	-1.436
D12	WT_Control	Cycloipin	SYBR				21.8969	22.1843	0.210097			0.135719	1	40						4.459	-0.395	0.244	1.889	1.05	0.617	1.577	-1.158	-1.421	-1.299	-1.48
E1	Ctnna1_KO	Ctnna1	SYBR	0.0590677	0.0489718	0.0712449	31.2162	31.407	0.200026	8.26751	0.110514	0.215751	1	40
E2	Ctnna1_KO	Slc27a2	SYBR	1.74327	1.33034	2.28435	33.8326	33.6061	0.304577	10.4667	0.159382	0.203847	1	40
E3	Ctnna1_KO	Etv1	SYBR	0.713023	0.552791	0.919701	30.5485	30.2157	0.285034	7.07624	0.150073	0.100267	1	40					RQ	0.0679	1.5	0.57	0.292	0.242	0.661	0.352	2.883	2.927	1.78	3.11
E4	Ctnna1_KO	Mafb	SYBR	0.30405	0.267593	0.345473	29.0498	28.9834	0.117647	5.84394	0.0753061	0.280021	1	40						0.0621	2.357	0.789	0.317	0.432	0.677	0.369	3.144	2.895	2.054	3.562
E5	Ctnna1_KO	Arx	SYBR	0.392994	0.254981	0.605708	33.5082	32.7969	0.501382	9.6574	0.255063	0.211492	1	40						0.0635	1.986	0.68	0.341	0.473	0.636	0.359	2.806	2.331	2.149	2.705
E6	Ctnna1_KO	Peg10	SYBR	0.656189	0.592256	0.727023	31.4677	31.4683	0.0759507	8.3288	0.0604396	0.221326	1	40						0.0455	1.315	0.844	0.27	0.483	0.652	0.335	2.231	2.678	2.46	2.789
E7	Ctnna1_KO	Sst	SYBR	0.35351	0.323814	0.38593	21.2848	21.2685	0.0431506	-1.87095	0.0517331	0.225619	1	40						0.0597	1.7896	0.721	0.3052	0.4074	0.6564	0.3537	2.766	2.7076	2.1108	3.0416
E8	Ctnna1_KO	Hk1	SYBR	2.74459	2.40565	3.1313	29.8254	29.8866	0.123762	6.74717	0.077718	0.282186	1	40
E9	Ctnna1_KO	LdhA	SYBR	2.69669	2.32937	3.12192	28.5878	28.6958	0.144809	5.55638	0.086332	0.209652	1	40
E10	Ctnna1_KO	Aldh1a1	SYBR	2.09682	1.65888	2.65039	32.0962	31.8503	0.259768	8.71086	0.138133	0.206953	1	40
E11	Ctnna1_KO	Cxcl14	SYBR	3.02368	2.66884	3.4257	31.5226	31.5533	0.113248	8.41389	0.0736009	0.192112	1	40
E12	Ctnna1_KO	Cycloipin	SYBR				23.1494	23.1395	0.0940388			0.135719	1	40
F1	Ctnna1_KO	Ctnna1	SYBR	0.0590677	0.0489718	0.0712449	31.4497	31.407	0.200026	8.26751	0.110514	0.215751	1	40
F2	Ctnna1_KO	Slc27a2	SYBR	1.74327	1.33034	2.28435	33.2856	33.6061	0.304577	10.4667	0.159382	0.203847	1	40
F3	Ctnna1_KO	Etv1	SYBR	0.713023	0.552791	0.919701	30.1836	30.2157	0.285034	7.07624	0.150073	0.100267	1	40
F4	Ctnna1_KO	Mafb	SYBR	0.30405	0.267593	0.345473	29.0362	28.9834	0.117647	5.84394	0.0753061	0.280021	1	40
F5	Ctnna1_KO	Arx	SYBR	0.392994	0.254981	0.605708	32.7764	32.7969	0.501382	9.6574	0.255063	0.211492	1	40
F6	Ctnna1_KO	Peg10	SYBR	0.656189	0.592256	0.727023	31.539	31.4683	0.0759507	8.3288	0.0604396	0.221326	1	40
F7	Ctnna1_KO	Sst	SYBR	0.35351	0.323814	0.38593	21.322	21.2685	0.0431506	-1.87095	0.0517331	0.225619	1	40
F8	Ctnna1_KO	Hk1	SYBR	2.74459	2.40565	3.1313	29.8055	29.8866	0.123762	6.74717	0.077718	0.282186	1	40
F9	Ctnna1_KO	LdhA	SYBR	2.69669	2.32937	3.12192	28.7082	28.6958	0.144809	5.55638	0.086332	0.209652	1	40
F10	Ctnna1_KO	Aldh1a1	SYBR	2.09682	1.65888	2.65039	31.9946	31.8503	0.259768	8.71086	0.138133	0.206953	1	40
F11	Ctnna1_KO	Cxcl14	SYBR	3.02368	2.66884	3.4257	31.4316	31.5533	0.113248	8.41389	0.0736009	0.192112	1	40
F12	Ctnna1_KO	Cycloipin	SYBR				23.2542	23.1395	0.0940388			0.135719	1	40
G1	Ctnna1_KO	Ctnna1	SYBR	0.0590677	0.0489718	0.0712449	31.2927	31.407	0.200026	8.26751	0.110514	0.215751	1	40
G2	Ctnna1_KO	Slc27a2	SYBR	1.74327	1.33034	2.28435	33.4084	33.6061	0.304577	10.4667	0.159382	0.203847	1	40
G3	Ctnna1_KO	Etv1	SYBR	0.713023	0.552791	0.919701	30.2736	30.2157	0.285034	7.07624	0.150073	0.100267	1	40
G4	Ctnna1_KO	Mafb	SYBR	0.30405	0.267593	0.345473	28.8071	28.9834	0.117647	5.84394	0.0753061	0.280021	1	40
G5	Ctnna1_KO	Arx	SYBR	0.392994	0.254981	0.605708	32.5183	32.7969	0.501382	9.6574	0.255063	0.211492	1	40
G6	Ctnna1_KO	Peg10	SYBR	0.656189	0.592256	0.727023	31.5034	31.4683	0.0759507	8.3288	0.0604396	0.221326	1	40
G7	Ctnna1_KO	Sst	SYBR	0.35351	0.323814	0.38593	21.2362	21.2685	0.0431506	-1.87095	0.0517331	0.225619	1	40
G8	Ctnna1_KO	Hk1	SYBR	2.74459	2.40565	3.1313	29.8449	29.8866	0.123762	6.74717	0.077718	0.282186	1	40
G9	Ctnna1_KO	LdhA	SYBR	2.69669	2.32937	3.12192	28.8962	28.6958	0.144809	5.55638	0.086332	0.209652	1	40
G10	Ctnna1_KO	Aldh1a1	SYBR	2.09682	1.65888	2.65039	31.8052	31.8503	0.259768	8.71086	0.138133	0.206953	1	40
G11	Ctnna1_KO	Cxcl14	SYBR	3.02368	2.66884	3.4257	31.704	31.5533	0.113248	8.41389	0.0736009	0.192112	1	40
G12	Ctnna1_KO	Cycloipin	SYBR				23.1296	23.1395	0.0940388			0.135719	1	40
H1	Ctnna1_KO	Ctnna1	SYBR	0.0590677	0.0489718	0.0712449	31.6692	31.407	0.200026	8.26751	0.110514	0.215751	1	40
H2	Ctnna1_KO	Slc27a2	SYBR	1.74327	1.33034	2.28435	33.8979	33.6061	0.304577	10.4667	0.159382	0.203847	1	40
H3	Ctnna1_KO	Etv1	SYBR	0.713023	0.552791	0.919701	29.8571	30.2157	0.285034	7.07624	0.150073	0.100267	1	40
H4	Ctnna1_KO	Mafb	SYBR	0.30405	0.267593	0.345473	29.0404	28.9834	0.117647	5.84394	0.0753061	0.280021	1	40
H5	Ctnna1_KO	Arx	SYBR	0.392994	0.254981	0.605708	32.3844	32.7969	0.501382	9.6574	0.255063	0.211492	1	40
H6	Ctnna1_KO	Peg10	SYBR	0.656189	0.592256	0.727023	31.363	31.4683	0.0759507	8.3288	0.0604396	0.221326	1	40
H7	Ctnna1_KO	Sst	SYBR	0.35351	0.323814	0.38593	21.231	21.2685	0.0431506	-1.87095	0.0517331	0.225619	1	40
H8	Ctnna1_KO	Hk1	SYBR	2.74459	2.40565	3.1313	30.0707	29.8866	0.123762	6.74717	0.077718	0.282186	1	40
H9	Ctnna1_KO	LdhA	SYBR	2.69669	2.32937	3.12192	28.5912	28.6958	0.144809	5.55638	0.086332	0.209652	1	40
H10	Ctnna1_KO	Aldh1a1	SYBR	2.09682	1.65888	2.65039	31.5052	31.8503	0.259768	8.71086	0.138133	0.206953	1	40
H11	Ctnna1_KO	Cxcl14	SYBR	3.02368	2.66884	3.4257	31.5552	31.5533	0.113248	8.41389	0.0736009	0.192112	1	40
H12	Ctnna1_KO	Cycloipin	SYBR				23.0247	23.1395	0.0940388			0.135719	1	40
Analysis Type	Singleplex
Endogenous Control	Cycloipin
RQ Min/Max Confidence Level	95.0
Reference Sample	WT_Control
