# Supplementary material for: Coordination between ECM and cell-cell adhesion regulates the development of islet aggregation, architecture, and functional maturation
Source: eLife. 2023 Aug 23;12:e90006. doi: 10.7554/eLife.90006 (PMC10482429; doi:10.7554/eLife.90006)
Supplement: Figure 4—figure supplement 1—source data 2. [file elife-90006-fig4-figsupp1-data2.xlsx]

## Sheet: Suppl 4-1B
Hyperglycemic Clamp-Blood glucose (8-10 weeks)
	Control (n= 2)					Mutant (n= 3)
		Glucose (mg/dL						Glucose (mg/dL
	Time (min)	1	2			Time (min)	1	2	3
	-15	112	106	109		-15	125	124	119	122.667
	-5	12	127	69.5		-5	143	138	143	141.333
	5	200	321	260.5		5	299	301	319	306.333
	10	142	200	171		10	235	253	371	286.333
	15	142	159	150.5		15	203	186	342	243.667
	20	235	168	201.5		20	222	161	333	238.667
	30	217	307	262		30	259	227	331	272.333
	40	219	307	263		40	272	253	327	284
	50	227	286	256.5		50	280	259	287	275.333
	60	244	261	252.5		60	317	209	235	253.667
	70	274	269	271.5		70	312	278	235	275
	80	271	277	274		80	302	264	273	279.667
	90	272	266	269		90	280	254	264	266
	100	279	271	275		100	278	277	271	275.333
	110	280	286	283		110	280	266	279	275
	120	278	284	281		120	277	280	284	280.333
