# Supplementary material for: Coordination between ECM and cell-cell adhesion regulates the development of islet aggregation, architecture, and functional maturation
Source: eLife. 2023 Aug 23;12:e90006. doi: 10.7554/eLife.90006 (PMC10482429; doi:10.7554/eLife.90006)
Supplement: Figure 4—figure supplement 1—source data 3. [file elife-90006-fig4-figsupp1-data3.xlsx]

## Sheet: Suppl 4-1C
Hyperglycemic Clamp-Blood Insulin (8-10 weeks)
	Control (n= 2)					Mutant (n= 3)
		Insulin (ng/mL)						Insulin (ng/mL)
	Time (min)	1	2			Time (min)	1	2	3
	-15	0.254	0.736	0.495		-15	0.424	0.458	0.354	0.412
	-5	0.413	0.965	0.689		-5	0.668	0.378	0.255	0.433667
	5	3.374	4.719	4.0465		5	5.96	4.87	0.106	3.64533
	10	0.317	0.832	0.5745		10	2.422	3.135	0.194	1.917
	15	0.166	0.404	0.285		15	2.034	1.407	0.323	1.25467
	30	3.432	5.691	4.5615		30	5.248	3.834	0.533	3.205
	60	3.417	5.569	4.493		60	5.986	3.393	0.1	3.15967
	90	4.033	10.869	7.451		90	3.074	3.553	0.272	2.29967
	120	5.504	10.978	8.241		120	2.974	4.54	0.276	2.59667
