# Supplementary material for: Coordination between ECM and cell-cell adhesion regulates the development of islet aggregation, architecture, and functional maturation
Source: eLife. 2023 Aug 23;12:e90006. doi: 10.7554/eLife.90006 (PMC10482429; doi:10.7554/eLife.90006)
Supplement: Figure 4—figure supplement 1—source data 4. [file elife-90006-fig4-figsupp1-data4.xlsx]

## Sheet: Suppl 4-1F
Sst area/ pancreas area
Control (n= 3)			%			Mutant (n= 3)			%
	Pancreas area (um)	Sst Area (um)	Sst Area				Pancreas area (um)	Sst Area (um)	Sst Area
1	828390	247.648	0.0298951			1	873793	728.25	0.0872474
2	561128	77.0874	0.0137379			2		34.1122
3	1.01236e+06	294.643	0.0433363			3	837457	0	0
4		144.075				4	817828	0	0
5	1.09465e+06	610.412	0.0557631			5	507456	0	0
6	1.03644e+06	56.1666	0.00541918			6	698543	0	0.0331762
7	1.21916e+06	265.594	0.0217849			7		231.75
8	886234	919.947	0.103804			8	586551	78.221	0.0133358
9	648789	178.496	0.0452872			9	64319.3	0	0
10		115.322				10	875463	0	0.00832268
11	1.04475e+06	145.415	0.0260813			11		72.862
12		127.07				12	740382	82.5495	0.0111496
13	953661	4414.5	0.55802			13	576556	0	0
14		294.334				14	771635	0	0.0666454
15		413.984				15		237.652
16		198.799				16		276.608
17	1.00368e+06	158.812	0.209111			17	598488	246.721	0.0996851
18		1940				18		349.882
19	1.01898e+06	197.871	0.0194185			19	935001	180.042	0.0192558
20	1.22507e+06	2160.25	0.275536			20		0
21		1215.25				21	1.0243e+06	979.25	0.319213
22	992379	562.75	0.0976801			22		604.435
23		286.75				23		1479.91
24		119.857				24		206.116
25	1.05577e+06	204.982	0.0636958			25	859818	0	0
26		467.5				26		0
27	1.15434e+06	2747	0.287566			27	961817	577.64	0.0600572
28		572.487				28	898037	118.929	0.0132432
29		0				29		0
30	1.14087e+06	939.5	0.236684			30	628638	0	0
31		15.6648				31	283560	110.272	0.0388884
32		808.5				32	1.01441e+06	25.4553	0.0664117
33		936.591				33		120.99
34	1.11149e+06	422.25	0.0379894			34		36.9979
35		0				35		105.325
36	1.18405e+06	4276.25	1.18023			36		335.454
37		4748.5				37		49.4678
38		1915				38		0
39		3034.75				39		0
40	1.08033e+06	798.75	0.216785			40	874789	71.2131	0.0593677
41		747				41		386.5
42		533.25				42		61.6287
43		263.004				43	1.03445e+06	401.5
44	1.17356e+06	238.75	0.0957248			44		0
45		787.25				45		55.033
46		97.3898				46	794296	0	0.0765143
47		0				47		0
48	1.00094e+06	192.718	0.0192538			48		607.75
49	947590	49.777	0.00525301			49	990181	0	0
50	988712	3352	0.354318			50		0
51		151.186				51	794296	1027.25	0.361855
52		0				52		0
53	988712	512.75	0.931895			53		699
54		7825.75				54		866.5
55		875.25				55		0
56	1.07103e+06	101.615	0.0322541			56		170.252
57		243.835				57		111.2
58	1.18938e+06	0	0.288681			58	992486	947.412	0.11201
59		1546.5				59		33.803
60		1887				60		0
61	695959	4658.75	0.6694			61		130.471
62	1.09215e+06	316	0.0289339			62		0
63		0				63	1.14785e+06	588.25
64		0				64		729.75
65	738105	211.166	0.0286092			65		77.6027
66	1.03194e+06	1446.25	0.830668			66		0
67		7125.75				67		239.198
68	833092	182.516	0.294657			68		0
69		495.25				69	709743	0	0.128782
70		1777				70		328.961
71	1.03194e+06	1351.75	0.219368			71		240.022
72		912				72		345.038
73	994525	207.043	0.0557094			73	685930	0	0.0333051
74		347				74		72.4498
75	1.09555e+06	13861.2	1.29743			75		156
76		352.75				76		0
77	1.01351e+06	1014.5	0.684623			77	735760	0	0.00154077
78		1864.75				78		0
79		1108				79		11.3364
80		2361				80	996049	128.41	0.192822
81		590.5				81		503.25
82	1.01351e+06	1341.5	0.316319			82		1136
83		1507.75				83		0
84		253.935				84		152.938
85		102.749				85		0
86	1.13935e+06	778.75	0.224337			86	936024	309.586	0.0544013
87		1567				87		155.514
88		210.238				88		0
89	605619	585.246	0.121379			89		44.1088
90		149.846				90	1.06697e+06	1144.25	0.129475
91	1.01351e+06	721	0.355925			91		181.25
92		542				92		55.9605
93		1566				93	1.10192e+06	88.2176	0.236606
94		660.25				94		0
95		118.105				95		562.25
96	451619	496.5	0.182897			96		1263.75
97		329.5				97		0
98		0				98		224.5
99	575731	557.25	0.24864			99		0
100		874.25				100		149.5
101	584113	2255.25	0.386098			101		319
102	883585	238.992	0.10296			102		0
103		670.75				103	966484	38.7498	0.201154
104	488457	1001.5	0.205034			104		0
105	551442	433.25	0.229444			105		1786.75
106		832				106		0
107	745946	1375.25	0.184363			107		0
108	715310	364.207	0.050916			108		118.62
109	629515	78.4271	0.0124583			109	1.02296e+06	264.653	0.134327
110	592388	401.617	0.0677963			110		645.75
111	316775	708.215	0.223571			111		0
112	961072	2255.25	0.23466			112		155.205
113	324164	18.1382	0.00559537			113		308.5
114	924706	535	0.0578562			114		0
115	957132	1386.5	0.14486			115	949420	0	0.0113867
116	746876	334.5	0.0447865			116		0
117	235431	151.701	0.0644357			117		108.108
118	731268	0	0			118	563796	127.792	0.0438703
119	1.02864e+06	2493	0.353278			119		119.547
120		799.524				120	977535	85.8473	0.00878202
121		341.431				121	692172	626	0.334906
122	165638	335.5	0.20255			122		400.5
123	1.11019e+06	2617	0.499529			123		304.5
124		2928.75				124		247.75
125	645354	813.5	0.126055			125		0
126	1.15052e+06	4522.25	0.393061			126		666
127	735195	891	0.121192			127		73.3773
128	524191	167.25	0.0319063			128		0
129	1.08182e+06	1458.5	0.134819			129		0
130		0				130		0
131	829415	17.1076	0.0322345			131	692172	872.25	0.614181
132		250.25				132		488.5
133	592275	195.5	0.0330083			133		40.2957
134	690693	1861	0.26944			134		833.25
135	1.01833e+06	802.1	0.0787662			135		71.9345
136	549582	58.2278	0.0105949			136		1377
137	931297	512	0.108156			137		304.75
138		495.25				138		0
139	1.11181e+06	2023.5	0.474971			139		0
140		754.75				140		263.21
141		965				141	1.18331e+06	190.657	0.218194
142		1018.25				142		198.25
143		519.25				143		472
144	1.09274e+06	2293.5	0.376348			144		494.5
145		1819				145		234.25
146	861214	32.3602	0.530954			146		289.75
147		0				147		0
148		0				148		0
149		0				149		440.5
150		350.575				150		0
151		4189.72				151		262
152	1.0784e+06	0	0.00544722			152	1.01949e+06	0	0.211258
153		58.743				153		230.25
154	1.16731e+06	800.142	0.107913			154		869.75
155		0				155		1053.75
156		459.536				156		0
157	419350	993.136	0.236827			157	966628	143.663	0.0330083
158	830125	82.1372	0.0213906			158		175.405
159		0				159		0
160		0				160	696830	0	0
161		95.4317				161	625336	1085.5	0.232636
162	1.06391e+06	1528	0.512813			162		88.1146
163		1386.25				163		0
164		1588.25				164		281.142
165		953.39				165	740815	354	0.0679707
166	850376	237.033	0.0278739			166		149.537
167	445739	429.5	0.0963569			167		0
168	955955	742.327	0.229198			168	768091	495	0.0644455
169		981.75				169	1.04627e+06	0	0.0526483
170		211.475				170		117.589
171		255.481				171		135.521
172	850816	1902.55	0.223615			172		297.735
173	588411	40.914	0.00695331			173		0
174	1.0036e+06	480.75	0.0501616			174		0
175		22.6728				175	721774	0	0
176	669019	2196.25	0.385368			176		0
177		381.933				177	947626	864	0.17069
178		0				178		753.5
179	875015	476.75	0.100795			179	1.12603e+06	329.25	0.101291
180		405.224				180		778.75
181	1.08225e+06	893.25	0.273365			181		32.5663
182		2065.25				182	1.05954e+06	103.779	0.115451
183	1.15934e+06	3488	0.312756			183		0
184		137.892				184		73.3773
185	878318	1993.5	10.7998			185		446.5
186	661581	2509	7.35779			186		101.1
187		309.689				187		72.2437
188	548706	718.5	0.130945			188		291.448
189	845486	1164.5	0.137731			189		134.8
190	716656	93.5767	0.0939472			190		0
191		535.283				191	1.02385e+06	2034.25	0.257778
192		0				192		605
193		44.418				193	1.19613e+06	0	0.056558
194	951599	180.75	0.0700663			194		342.049
195		486				195		282
196		0				196		52.4565
197	1.00495e+06	1950.75	0.252824			197	881563	0	0.00270048
198		590				198		23.8064
199	945017	4301.5	0.455177			199	1.06737e+06	0	0.0836909
200	498630	52.1473	0.0104581			200		430.75
201		0				201		21.5391
202	818975	779	0.10886			202		441
203		112.539				203	566675	0	0.0016186
204	1.17908e+06	2231.5	0.505374			204		9.1722
205		2376				205		0
206		1351.25				206	943938		0.316311
207	1.18112e+06	2164	0.539067			207		2038.25
208		4048				208		259
209		154.999				209		199.933
210	816102	39.5743	0.00484919			210		488.598
						211	469548	237.343	0.050547
						212		0
						213	1.09604e+06	488.186	0.108153
						214		183.75
						215		0
						216		347.75
						217		119.753
						218		45.9639
						219	1.02082e+06	0	0.0312761
						220		228.583
						221		90.6911
						222	937518	45.2425	0.00482578
						223		0
						224	865792	668.25	0.0771837
						225	591445	0	0
						226		0
						227	937576	169.015	0.0216981
						228		34.4214
						229		0
						230	338814	152.114	0.089944
						231		152.629
						232		0
						233	754512	213	0.0282302
						234		0
						235	716608	206.734	0.028849
						236		0
						237		0
						238		0
						239	828309	35.3489	0.0187749
						240		0
						241		120.166
						242	910897	571.75	0.0627678
						243	1.02425e+06	322.25	0.138252
						244		63.3807
						245		608.25
						246		122.845
						247		61.3195
						248		238
						249		0
						250	1.03142e+06	0	0.0274744
						251		0
						252		98.6266
						253		184.75
						254	1.00824e+06	0	0.0141671
						255		93.1644
						256		49.674
						257	521991	253.5	0.048564
						258		0
						259	800554	536.75	0.1739
						260		52.6626
						261		802.75
						262	746518	534.75	0.459809
						263		960.5
						264		62.5562
						265		690.25
						266		1184.5
						267	769392	483.75	0.215366
						268		195.398
						269		787
						270		190.863
						271	680066	0	0.0290415
						272		65.751
						273		131.75
						274		0
						275	754574	11.2333	0.00148869
						276	1.01577e+06	1289.75	0.199685
						277		484.25
						278		138.922
						279		0
						280		115.425
						281		0
						282	917864	329.373	0.0421276
						283		57.3002
						284	1.04415e+06	1185.5	0.129132
						285		102.646
						286		60.1859
						287	1.09032e+06	82.4464	0.196801
						288		0
						289		467.986
						290		1201.5
						291		0
						292		0
						293		193.543
						294		150
						295		50.2923
						296	967426	1912.5	0.202622
						297		47.7159
						298		0
						299		0
						300	1.01723e+06	656.75	0.117159
						301		0
						302		268.775
						303		266.25
						304	937709	0	0
						305		0
						306	562238	0	0.0182567
						307		102.646
						308	978159	65.4418	0.0066903
						309	281778	0	0
						310	536107	868.25	0.185138
						311		124.288
						312	633434	380.49	0.155864
						313		606.806
						314	600640	0	0.00986588
						315		59.2584
						316	557963	113.879	0.0237529
						317		18.6535
						318		0
						319	712758	177.5	0.389633
						320		1552.36
						321		1047.28
						322	244801	0	0
						323	872465	115.631	0.0132534
						324	1.02199e+06	75.7476	0.00741181
						325	506016	263.5	0.174557
						326		230.75
						327		161.286
						328		0
						329		227.75
						330	733700	71.8314	0.198253
						331		316
						332		1066.75
						333	771661	0	0
						334	1.17045e+06	687.25	0.12177
						335		738.004
						336	1.14648e+06	790	0.0706236
						337		19.6841
						338		0
						339	468867	0	0
						340	1.0346e+06	59.4644	0.00574758
						341	835616	470.25	0.325448
						342		674.75
						343		545.75
						344		367.75
						345		439.25
						346		221.75
						347	311901	46.1699	0.0148027
						348	920274	0	0
						349	841354	339.5	0.0946986
						350		457.25
						351	847271	517.75	0.167157
						352		284.5
						353		614.02
						354	933324	312.781	0.0503075
						355		0
						356		156.751
						357		0
						358		0
						359	556119	283.1	0.0509064
						360	1.07431e+06	0	0.01202
						361		8.966
						362		120.166
						363	832242	200.963	0.193924
						364		190.75
						365		374.75
						366		810.25
						367		0
						368		37.2039
						369	424164	766.5	0.275612
						370		402.545
						371	743904	165.408	0.120086
						372		213.742
						373		478
						374		36.1734
						375	353681	339.576	0.0960119
						376		0
						377		0
						378	687342	74.5109	0.0802613
						379		0
						380		55.2391
						381		0
						382		421.919
						383	691030	575	0.0917099
						384		48.5403
						385		0
						386		10.2027
