# Supplementary material for: Coordination between ECM and cell-cell adhesion regulates the development of islet aggregation, architecture, and functional maturation
Source: eLife. 2023 Aug 23;12:e90006. doi: 10.7554/eLife.90006 (PMC10482429; doi:10.7554/eLife.90006)
Supplement: Figure 4—source data 1. [file elife-90006-fig4-data1.xlsx]

## Sheet: Fig 4B
IPGTT 8 weeks
Control (n= 20)							Mutant (n= 20)
	T0 min	T15 min	T30 min	T60 min	T120 min			T0 min	T15 min	T30 min	T60 min	T120 min
	(mg/dL)	(mg/dL)	(mg/dL)	(mg/dL)	(mg/dL)			(mg/dL)	(mg/dL)	(mg/dL)	(mg/dL)	(mg/dL)
1	67	290	325	176	93		1	75	373	304	209	113
2	102	180	123	98	100		2	59	382	326	270	99
3	43	331	280	169	124		3	96	289	192	163	107
4	46	289	309	179	95		4	53	296	282	170	107
5	49	261	235	142	66		5	52	277	252	189	92
6	38	247	249	162	64		6	44	220	258	197	90
7	45	245	176	116	47		7	39	321	293	146	70
8	33	180	183	137	81		8	45	280	198	126	69
9	44	317	278	189	101		9	43	240	231	147	59
10	77	268	196	109	80		10	73	316	261	188	77
11	51	234	197	139	70		11	47	240	221	214	89
12	39	232	227	165	65		12	39	188	182	152	113
13	42	287	186	177	85		13	53	160	260	194	126
14	65	147	226	196	101		14	78	189	252	230	121
15	41	166	251	193	80		15	58	259	297	263	98
16	45	182	220	210	94		16	52	207	218	207	119
17	50	230	259	163	92		17	72	190	330	182	124
18	51	217	244	238	103		18	98	263	307	218	147
19	38	121	179	195	87		19	55	157	317	198	98
20	52	245	210	172	101		20	49	221	219	159	83
	50.9	233.45	227.65	166.25	86.45			59	253.4	260	191.1	100.05
	16.1111	56.8308	49.0459	34.8665	17.8162			17.4416	64.4568	45.9313	37.6464	22.1869
