# Supplementary material for: Coordination between ECM and cell-cell adhesion regulates the development of islet aggregation, architecture, and functional maturation
Source: eLife. 2023 Aug 23;12:e90006. doi: 10.7554/eLife.90006 (PMC10482429; doi:10.7554/eLife.90006)
Supplement: Figure 4—source data 2. [file elife-90006-fig4-data2.xlsx]

## Sheet: Fig 4C
GSIS in vivo 8 weeks old
Control	Insulin (ug/L)					Mutant	Insulin (ug/L)
	T0	T15	T15-T0				T0	T15	T15-T0
1	0.110082	0.2	0.0899179			1	0.127067	0.266528	0.139461
2	0.0618397	0.25	0.18816			2	0.0731374	0.302574	0.229436
3	0.121932	0.278241	0.156309			3	0.0940679	0.322353	0.228285
4	0.212963	0.205731	-0.00723205			4	0.203338	0.388008	0.18467
5	0.140781	0.330676	0.189895			5	0.0825913	0.354942	0.27235
6	0.0827867	0.550472	0.467685				0.11604	0.326881	0.210841
7	0.111632	0.219271	0.107638				0.0528789	0.046845	0.0505308
	0.120288	0.290627	0.170339
	0.0483269	0.12345	0.147897
