# Supplementary material for: Coordination between ECM and cell-cell adhesion regulates the development of islet aggregation, architecture, and functional maturation
Source: eLife. 2023 Aug 23;12:e90006. doi: 10.7554/eLife.90006 (PMC10482429; doi:10.7554/eLife.90006)
Supplement: Figure 4—source data 3. [file elife-90006-fig4-data3.xlsx]

## Sheet: Fig 4D
IPGTT 12 months
Control (n= 13)							Mutant (n= 14)
	T0 min	T15 min	T30 min	T60 min	T120 min			T0 min	T15 min	T30 min	T60 min	T120 min
	(mg/dL)	(mg/dL)	(mg/dL)	(mg/dL)	(mg/dL)			(mg/dL)	(mg/dL)	(mg/dL)	(mg/dL)	(mg/dL)
1	90	266	337	171	147		1	145	385	602	421	237
2	78	239	149	106	87		2	120	418	308	144	113
3	107	285	271	259	175		3	147	411	567	527	286
4	95	333	276	187	157		4	156	442	403	282	142
5	65	290	265	243	156		5	129	265	294	168	131
6	85	206	191	196	117		6	95	409	390	253	175
7	117	405	370	401	163		7	112	413	301	215	128
8	109	370	412	318	194		8	116	267	255	172	120
9	67	144	124	96	91		9	91	432	323	277	183
10	107	302	253	199	148		10	101	358	366	231	145
11	69	334	201	138	116		11	65	409	342	287	204
12	114	36.2	434	402	186		12	74	309	303	211	129
13	70	214	227	178	125		13	80	264	255	187	156
	90.2308	263.4	270	222.615	143.231		14	69	238	247	245	155
	19.2187	98.3701	96.0503	99.5059	33.971			107.143	358.571	354	258.571	164.571
								29.956	73.6204	108.839	103.484	49.168
