# Supplementary material for: Coordination between ECM and cell-cell adhesion regulates the development of islet aggregation, architecture, and functional maturation
Source: eLife. 2023 Aug 23;12:e90006. doi: 10.7554/eLife.90006 (PMC10482429; doi:10.7554/eLife.90006)
Supplement: Figure 4—source data 4. [file elife-90006-fig4-data4.xlsx]

## Sheet: Fig 4G
Insulin area/Pancreas area
Control (n=3)			%			Mutant (n= 3)			%
	Pancreas area (um)	Ins Area (um)	Ins Area				Pancreas area (um)	Ins Area (um)	Ins Area
1	828390	1433.88	0.173092			1	873793	8282.87	0.971982
2	561128	4645.54	0.827893			2		210.238
3	1.01236e+06	786.745	0.153005			3	837457	821.063	0.0980424
4		762.217				4	817828	806.12	0.0985684
5	1.09465e+06	2501.85	0.228552			5	507456	691.519	0.136272
6	1.03644e+06	1275.23	0.123039			6	698543	2980.23	0.603734
7	1.21916e+06	1876.74	0.153936			7		1237.11
8	886234	9688.49	1.09322			8	586551	441.5	0.0752706
9	648789	668.331	0.237396			9	64319.3	551.463	0.857383
10		871.871				10	875463	4452	0.673867
11	1.04475e+06	725.941	0.152039			11		1447.45
12		862.492				12	740382	629.066	0.0849651
13	953661	31097.2	3.61114			13	576556	798.39	0.138476
14		977.608				14	771635	1803.31	0.653285
15		1253.19				15		2331.69
16		1110.04				16		905.983
17	1.00368e+06	3111.01	0.846235			17	598488	1067.91	0.269149
18		5382.51				18		542.909
19	1.01898e+06	2718.46	0.266782			19	935001	1558.34	0.27528
20	1.22507e+06	18824.4	2.30058			20		1015.53
21		9359.32				21	1.0243e+06	8905.86	2.31202
22	992379	4126.03	0.654207			22		6728.55
23		1875.32				23		5115.49
24		490.865				24		2932.21
25	1.05577e+06	1395.71	0.294755			25	859818	697.187	0.182284
26		1716.22				26		870.119
27	1.15434e+06	38181.5	3.90831			27	961817	786.745	0.0817978
28		5860.6				28	898037	1650.37	0.244047
29		1072.94				29		541.261
30	1.14087e+06	3942.79	0.573949			30	628638	1715.71	0.272925
31		702.546				31	283560	1171.87	0.413271
32		1484.24				32	1.01441e+06	5913.47	1.50621
33		418.416				33		3854.06
34	1.11149e+06	3614.66	0.439846			34		1012.34
35		1274.21				35		769.534
36	1.18405e+06	22000.7	5.31306			36		963.798
37		30121.8				37		1136.73
38		6361.26				38		940.404
39		4425.31				39		688.84
40	1.08033e+06	6765.86	2.29419			40	874789	3188.72	0.987498
41		10120.1				41		3949.18
42		7602.9				42		1500.63
43		296.086				43	1.03445e+06	5788.56
44	1.17356e+06	6296.95	1.22068			44		1117.56
45		5644.49				45		1775.79
46		1179.29				46	794296	776.851	1.0606
47		1204.75				47		1611.52
48	1.00094e+06	2365.9	0.236369			48		6035.9
49	947590	759.95	0.0801982			49	990181	2090.74	0.266424
50	988712	31983.3	3.50402			50		547.341
51		2050.85				51	794296	10959	5.04431
52		610.516				52		5373.55
53	988712	5102.81	4.05922			53		5487.67
54		30243.2				54		7978.96
55		4787.97				55		7942.68
56	1.07103e+06	965.241	0.287034			56		1544.02
57		2108.98				57		780.87
58	1.18938e+06	559.193	2.74694			58	992486	2508.12	1.27433
59		15699.1				59		3252.41
60		16413.1				60		2792.87
61	695959	29444.7	4.23081			61		3346.81
62	1.09215e+06	3438.01	0.449875			62		747.377
63		914.125				63	1.14785e+06	3000.22
64		561.151				64		2874.08
65	738105	1440.03	0.195098			65		1154.46
66	1.03194e+06	8985.01	7.9833			66		1156.72
67		73397.9				67		980.803
68	833092	881.352	1.22352			68		795.711
69		865.79				69	709743	2331.48	1.13112
70		8445.91				70		1506.4
71	1.03194e+06	15493.2	2.23103			71		2884.18
72		7529.73				72		1305.95
73	994525	2837.19	0.377321			73	685930	2034.88	1.18068
74		915.361				74		1632.44
75	1.09555e+06	96773	8.91419			75		3806.24
76		886.196				76		625.047
77	1.01351e+06	8345.12	4.47898			77	735760	441.603	0.188464
78		22000.1				78		423.981
79		2044.98				79		521.061
80		10580				80	996049	7151.3	5.08065
81		2424.85				81		3621.97
82	1.01351e+06	20516.9	2.80971			82		32754.2
83		5783				83		2754.23
84		1015.22				84		1469.81
85		1161.67				85		2854.29
86	1.13935e+06	11823.7	1.60401			86	936024	2806.58	0.565583
87		5315.11				87		927.11
88		1136.52				88		703.577
89	605619	4810.44	0.94422			89		856.721
90		907.941				90	1.06697e+06	12554.8	1.95359
91	1.01351e+06	4643.69	1.69329			91		7334.64
92		8388.61				92		954.832
93		1662.02				93	1.10192e+06	8607.82	4.39127
94		1215.88				94		2217.71
95		1251.54				95		6748.62
96	451619	1966.66	0.686027			96		6782.76
97		664.415				97		12664.8
98		467.162				98		2669.1
99	575731	5609.34	1.32576			99		1740.55
100		2023.44				100		817.456
101	584113	15277.5	2.61551			101		5735.8
102	883585	271.558	0.302892			102		403.781
103		2404.76				103	966484	3738.12	2.29252
104	488457	14731.9	3.01602			104		993.17
105	551442	3644.34	1.63084			105		14576.2
106		5348.81				106		1576.38
107	745946	9068.49	1.2157			107		481.693
108	715310	1839.79	0.257202			108		791.279
109	629515	314.533	0.0499643			109	1.02296e+06	6307.15	1.9357
110	592388	8949.46	1.51074			110		3097.61
111	316775	2083.11	0.657601			111		2396.3
112	961072	22657.3	2.3575			112		916.289
113	324164	400.071	0.123416			113		6241.4
114	924706	4368.63	0.472434			114		842.602
115	957132	6477.2	0.67673			115	949420	1639.86	0.306551
116	746876	1214.02	0.162547			116		808.078
117	235431	582.484	0.247412			117		462.524
118	731268	1099.42	0.150345			118	563796	1759.1	0.51215
119	1.02864e+06	20272.3	2.05175			119		1128.38
120		536.829				120	977535	741.914	0.0758965
121		295.983				121	692172	20928.2	5.18386
122	165638	1315.43	0.794161			122		1393.34
123	1.11019e+06	23660.1	4.46563			123		1488.78
124		25917.1				124		1731.89
125	645354	2344.67	0.363316			125		2432.79
126	1.15052e+06	26812.6	2.33047			126		3787.28
127	735195	11346.9	1.54339			127		1432.51
128	524191	3037.43	0.579451			128		1083.86
129	1.08182e+06	12783.6	1.22124			129		757.579
130		428				130		844.972
131	829415	1870.3	0.443909			131	692172	14829.8	8.38976
132		1811.55				132		2778.24
133	592275	1343.98	0.226918			133		1455.9
134	690693	18323.5	2.65292			134		11380.2
135	1.01833e+06	2256.76	0.221614			135		3645.99
136	549582	2429.39	0.442042			136		4623.49
137	931297	1549.37	0.467221			137		12592.1
138		2801.84				138		2325.3
139	1.11181e+06	10273.2	2.57866			139		2334.57
140		7851.89				140		2105.89
141		3786.45				141	1.18331e+06	6119.89	5.52161
142		5936.97				142		3829.64
143		821.166				143		6913.13
144	1.09274e+06	16551.3	2.72854			144		11744.6
145		13264.5				145		6921.48
146	861214	656.789	1.69112			146		3118.84
147		2224.09				147		3702.87
148		1613.37				148		1451.57
149		691.519				149		13796.6
150		1509.39				150		5756
151		7868.99				151		1982.94
152	1.0784e+06	530.543	0.202684			152	1.01949e+06	3543.24	2.66884
153		1655.21				153		963.902
154	1.16731e+06	12290.9	1.28301			154		7589.81
155		1453.74				155		13891.5
156		1231.96				156		1220.1
157	419350	6536.56	1.55874			157	966628	5544.31	0.745139
158	830125	200.757	0.168741			158		772.523
159		275.886				159		885.887
160		637.414				160	696830	721.612	0.103556
161		286.707				161	625336	3762.96	0.801278
162	1.06391e+06	10053.6	4.88437			162		607.321
163		33583.5				163		411.511
164		8232.17				164		228.892
165		96.2562				165	740815	1450.03	0.331273
166	850376	1661.71	0.195408			166		625.871
167	445739	1761.47	0.395179			167		378.223
168	955955	9043.55	1.2955			168	768091	2950.86	0.384181
169		2105.78				169	1.04627e+06	887.02	0.788011
170		410.068				170		224.976
171		824.979				171		1995.72
172	850816	5169.18	0.607556			172		3837.36
173	588411	895.677	0.15222			173		795.196
174	1.0036e+06	6106.8	0.699255			174		504.469
175		910.93				175	721774	1301.62	0.259953
176	669019	9864.2	1.93138			176		574.651
177		711.615				177	947626	10561	1.65639
178		2345.5				178		5135.38
179	875015	2317.05	0.312655			179	1.12603e+06	2796.38	0.938997
180		418.725				180		5860.39
181	1.08225e+06	6902.62	0.767926			181		1916.57
182		1408.29				182	1.05954e+06	3593.63	2.08856
183	1.15934e+06	35575.4	3.1821			183		1301.52
184		1315.84				184		4020.81
185	878318	16012.5	1.82309			185		2991.46
186	661581	33578.7	5.35191			186		3676.28
187		1828.56				187		1454.56
188	548706	3438.32	0.626624			188		2076.21
189	845486	4887.53	0.578073			189		2460.92
190	716656	884.65	0.3861			190		553.731
191		594.336				191	1.02385e+06	27157.9	3.48921
192		672.866				192		8566.18
193		615.153				193	1.19613e+06	2191.12	0.617964
194	951599	2826.78	0.57556			194		2107.74
195		2118.87				195		2441.86
196		531.367				196		650.914
197	1.00495e+06	5285.54	1.32625			197	881563	800.864	0.188741
198		8042.65				198		863.008
199	945017	32507.1	3.43984			199	1.06737e+06	617.317	0.559769
200	498630	1878.03	0.441308			200		1231.44
201		322.469				201		664.518
202	818975	2733.61	0.448196			202		3461.51
203		937.003				203	566675	562.078	0.386916
204	1.17908e+06	16807.5	3.61226			204		1007.29
205		17843				205		623.192
206		7940.82				206	943938	3397.1	3.257
207	1.18112e+06	17990.4	2.81415			207		21705.9
208		13460				208		1025.63
209		1787.95				209		345.038
210	816102	1050.06	0.128668			210		4270.41
						211	469548	4220.74	1.1664
						212		1256.07
						213	1.09604e+06	13710.2	2.52662
						214		2866.76
						215		1158.89
						216		4087.59
						217		4497.45
						218		1371.91
						219	1.02082e+06	551.36	0.320888
						220		1894.41
						221		829.926
						222	937518	1346.04	0.212532
						223		646.483
						224	865792	15401	1.77883
						225	591445	1290.7	0.318298
						226		591.862
						227	937576	4346.88	0.6437
						228		890.009
						229		798.287
						230	338814	588.358	0.512775
						231		574.857
						232		574.136
						233	754512	6016.94	0.859623
						234		469.017
						235	716608	1077.27	0.567488
						236		949.061
						237		471.697
						238		1568.65
						239	828309	395.846	0.32807
						240		993.376
						241		1328.21
						242	910897	3539.63	0.388587
						243	1.02425e+06	1766.21	2.50959
						244		4101.71
						245		6688.98
						246		8426.95
						247		2970.65
						248		1287.61
						249		462.421
						250	1.03142e+06	921.854	0.646732
						251		1288.64
						252		1778.47
						253		2681.57
						254	1.00824e+06	1266.17	0.50601
						255		3331.35
						256		504.263
						257	521991	1749.82	0.563966
						258		1194.03
						259	800554	8621.42	2.81078
						260		9029.12
						261		4851.25
						262	746518	9025.82	2.89508
						263		5564.41
						264		1463.73
						265		1228.14
						266		4330.19
						267	769392	5661.08	1.7882
						268		3640.11
						269		1598.02
						270		2859.03
						271	680066	2004.48	1.17481
						272		1627.29
						273		3733.89
						274		623.81
						275	754574	510.755	0.0676879
						276	1.01577e+06	31949.5	4.84234
						277		3553.75
						278		6956.52
						279		2609.12
						280		1136.52
						281		2981.78
						282	917864	2355.91	0.353919
						283		892.585
						284	1.04415e+06	12565.8	1.96419
						285		7071.84
						286		871.458
						287	1.09032e+06	8241.34	4.28394
						288		2154.94
						289		6551.19
						290		6672.49
						291		12197.8
						292		1673.87
						293		2669.82
						294		751.19
						295		5796.09
						296	967426	14248.2	2.14624
						297		3761.1
						298		994.613
						299		1759.41
						300	1.01723e+06	502.314	1.44874
						301		2216.06
						302		6174
						303		5844.63
						304	937709	1509.9	0.243558
						305		773.966
						306	562238	1749.51	0.494726
						307		1032.02
						308	978159	687.912	0.0703272
						309	281778	981.628	0.34837
						310	536107	12172.9	2.46109
						311		1021.2
						312	633434	657.201	0.488759
						313		2438.76
						314	600640	842.799	0.308294
						315		1008.94
						316	557963	1579.26	0.580137
						317		789.321
						318		868.367
						319	712758	4335.75	2.00914
						320		4201.37
						321		5783.2
						322	244801	445.726	0.182077
						323	872465	458.505	0.0525528
						324	1.02199e+06	2821.21	0.276052
						325	506016	2082.18	3.47068
						326		2786.38
						327		10366.3
						328		1269.57
						329		1057.79
						330	733700	10359.2	3.13947
						331		5999.32
						332		6675.79
						333	771661	2985.8	0.386931
						334	1.17045e+06	8215.17	0.790953
						335		1042.53
						336	1.14648e+06	3921.67	0.477537
						337		1083.76
						338		469.429
						339	468867	1463.94	0.312229
						340	1.0346e+06	2788.34	0.269509
						341	835616	11672.7	4.98903
						342		4191.78
						343		9344.68
						344		10044.8
						345		3539.63
						346		2895.62
						347	311901	3032.79	0.972356
						348	920274	1042.43	0.113274
						349	841354	2382.29	0.57943
						350		2492.77
						351	847271	13031	1.86771
						352		1466.93
						353		1326.67
						354	933324	4399.75	1.01797
						355		2931.28
						356		811.479
						357		729.444
						358		628.963
						359	556119	642.361	0.115508
						360	1.07431e+06	1419.11	0.316636
						361		447.272
						362		1535.26
						363	832242	5491.45	2.86134
						364		1250.61
						365		2974.87
						366		12148.6
						367		1246.59
						368		701.207
						369	424164	4973.48	1.5677
						370		1676.14
						371	743904	4529.71	1.85201
						372		728.105
						373		7955.77
						374		563.624
						375	353681	2219.97	1.00724
						376		561.254
						377		781.18
						378	687342	3156.98	1.56657
						379		877.745
						380		2757.63
						381		764.278
						382		3211.08
						383	691030	4104.8	0.85005
						384		547.65
						385		722.746
						386		498.904
