# Supplementary material for: Coordination between ECM and cell-cell adhesion regulates the development of islet aggregation, architecture, and functional maturation
Source: eLife. 2023 Aug 23;12:e90006. doi: 10.7554/eLife.90006 (PMC10482429; doi:10.7554/eLife.90006)
Supplement: Figure 4—source data 5. [file elife-90006-fig4-data5.xlsx]

## Sheet: Fig 4H
Glucagon area/ Pancreas area
Control (n= 3)			%			Mutant (n= 3)			%
	Pancreas area (um)	Gcg Area (um)	Gcg area				Pancreas area (um)	Gcg Area (um)	Gcg area
1	355206	538.25	0.509633			1	730286	67.8122	0.125
2		1272				2		768.25
3	511921	0	0.0535239			3		75.3354
4		274				4	667232	295.75	0.044
5	801355	0	0			5	478220	554.5	0.116
6	927055	1405.5	0.151609			6	770768	91.3094	0.069
7	594214	99.25	0.0167027			7		143.766
8	1.06499e+06	1586.75	0.148992			8		299.074
9	1.07093e+06	1953.5	0.288449			9	906990	62.144	0.007
10		1135.6				10	863376	0	0
11	835233	1284.5	0.153789			11	969311	65.8541	0.012
12	1.04004e+06	2693.5	1.32592			12		45.9639
13		11096.6				13	608743	372.245	0.061
14	1.23006e+06	2026.5	0.164748			14	721846	0	0
15	1.16709e+06	1053.15	0.0902374			15	967802	0	0
16	149388	504.25	0.802789			16	802976	157.75	0.138
17		695.023				17		950.25
18		0				18	802976	239	0.135
19	1.22163e+06	2556.75	0.269968			19		64.9265
20		741.25				20		587.75
21	899530	129.647	0.0144127			21		191
22	1.22163e+06	400.793	0.142641			22		0
23		1341.75				23	1.00982e+06	10.5119	0.023
24	1.17743e+06	4343.25	0.930668			24		191.894
25		4008.25				25		0
26		2606.5				26		25.6614
27	988489	335.75	0.033966			27	802976	679	0.185
28	1.17296e+06	210.857	0.922633			28		419.25
29		1963.25				29		388.25
30		3187				30		0
31		5461				31		0
32	833102	137.75	0.114692			32		0
33		817.75				33		0
34	938390	681.5	0.348949			34		0
35		2593				35		0
36	1.19708e+06	3724.5	0.338239			36	1.02174e+06	429.75	0.048
37		324.5				37		0
38	1.16145e+06	661.75	0.190259			38		0
39		359				39		0
40		898				40		62.144
41		291				41	939752	333.25	0.068
42	781652	968	0.12384			42		225.75
43	1.21653e+06	4355.25	0.395938			43		79.3547
44		288				44	619224	369	0.184
45		173.447				45		770
46	977769	685.5	0.752376			46	588901	0	0.021
47		6671				47		0
48	887935	946	0.434379			48		121.712
49		2911				49	925302	127.895	0.062
50	713679	471.75	0.0661011			50		288.356
51	1.12285e+06	1039.25	0.312186			51		158.709
52		2128				52		0
53		338.133				53	999724	206	0.051
54	1.19856e+07	4977.5	0.12435			54		51.8382
55		3935.75				55		0
56		4682.25				56		181.25
57		1308.5				57		0
58	1.23511e+06	479.75	0.604198			58		65.9571
59		3850				59		0
60		3132.75				60	1.07583e+06	56.9911	0.011
61	792943	876.25	0.110506			61		0
62	1.17422e+06	354.25	0.143733			62		0
63		645.75				63		0
64		687.75				64		59.0522
65	780147	382.5	0.0490292			65		0
66	1.03082e+06	12860	1.24755			66	1.11159e+06	30.8143	0.178
67	909470	766	0.0842249			67		239.25
68	1.19968e+06	602.75	0.434679			68		374.25
69		315				69		183
70		3033.25				70		732.25
71		1263.75				71		415.25
72	694285	938.5	0.255191			72		0
73		833.25				73	801054	190	0.048
74	1.20016e+06	740.75	0.827513			74		112.849
75		3570.25				75		80.9005
76		5620.5				76	1.135e+06	0	0.042
77	1.10995e+06	1465.5	0.380535			77		77.6027
78		307.75				78		10.2027
79		1051.25				79		186.75
80		1399.25				80		59.1553
81	927463	2023.5	0.218176			81		35.8642
82	705363	240.331	0.034072			82		0
83	1.04056e+06	2901.5	2.10746			83		0
84		1537.5				84		108.75
85		17490.5				85	532162	0	0
86	908811	2587.25	0.318972			86	618964	0	0
87		288				87	1.0837e+06	370.25	0.061
88		23.6003				88		137.5
89	1.17385e+06	1294	0.327299			89		0
90		2233.25				90		0
91		314.75				91		150
92	1.17385e+06	458.25	0.0934745			92	718324	85.332	0.027
93		639				93		109.448
94	872750	181.794	0.0208301			94		0
95	291006	1193.75	0.410214			95		0
96	291006	167.75	0.0576448			96		0
97	556519	383.5	0.388801			97	268661	90.4849	0.034
98		768.75				98	631071	367	0.075
99		982.75				99		109.344
100		28.7532				100		0
101	574454	2475	0.99773			101		0
102		3256.5				102	825768	0	0.027
103	625142	804.75	0.128731			103		165.25
104	759945	916.75	0.173269			104		54.2085
105		400				105	1.11112e+06	753.75	0.272
106	718825	2116.75	0.294474			106		100.894
107	718825	546.75	0.0760617			107		461.25
108	777239	387.91	0.0499088			108		1705.75
109	551553	4060	0.736104			109		0
110	779181	1129.5	0.20698			110	1.13718e+06	171.25	0.071
111		483.25				111		0
112	917290	4337.75	0.472888			112		96.7715
113		0				113		22.4666
114	917290	278.75	0.0303884			114		29.6807
115		0				115		0
116	827319	997.75	0.1206			116		0
117	541648	2777	0.717901			117		138
118		1111.5				118		319.995
119	659415	0	0			119		26.589
120		0				120	993687	317.5	0.445
121	995039	1199.75	0.764193			121		604.75
122		5087.5				122		0
123		1206.5				123		924
124		110.272				124		54.1054
125	991240	2901.75	0.484772			125		402
126		1903.5				126		1650.75
127	1.18605e+06	5928.25	0.887757			127		389.25
128		4601				128		75.9537
129	663171	1228.25	0.377914			129		0
130		1058.25				130		0
131		219.72				131	1.10347e+06	1086.25	0.163
132	973924	720	0.578485			132		523.25
133		4914				133		119.25
134	648399	1839.75	1.20184			134		0
135		5953				135		69.4611
136	566666	1087	0.2362			136	1.15288e+06	0	0.042
137		251.462				137		62.4531
138	1.11672e+06	2213.25	0.32862			138		419.25
139		717.75				139	1.08458e+06	0	0.069
140		330.5				140		91.5155
141		408.25				141		55.2391
142	667723	268.054	0.0971741			142		600.25
143		380.799				143	926441	748.5	0.081
144	754255	10119.2	1.44001			144	1.00304e+06	0	0.014
145		742.121				145		0
146	840414	497.461	0.0591924			146		143.251
147	429134	1144.75	0.266758			147	1.01268e+06	814	0.191
148	1.07081e+06	2139	0.624666			148		296.75
149		301.5				149		99.5
150		2590.25				150		0
151		1658.25				151		50.2923
152		0				152		0
153	493100	1184.25	0.240164			153		668.75
154	1.17873e+06	3894.75	1.40951			154	712944	321.75	0.091
155		1088				155		204.5
156		3191.75				156		119.65
157		899.75				157		0
158		7216.75				158	1.08992e+06	0	0.122
159		323.396				159		222.75
160	626827	1197.25	0.370382			160		600
161		1028.25				161		326.488
162		96.1531				162		92.0308
163	945111	3992.25	0.442845			163		90.5
164		193.131				164		0
165	835450	1712.75	0.220989			165	1.06679e+06	102.44	0.331
166		133.5				166		0
167	853558	675	0.0790807			167		0
168	1.1306e+06	2707.5	0.239475			168		0
169	758311	490.75	0.145455			169		0
170		612.25				170		144.075
171	772313	692.5	0.198718			171		94.6072
172		723.5				172		129.75
173		118.723				173		246
174	695661	932.5	0.174618			174		104.25
175		282.25				175		0
176		0				176		210.75
177	789349	496.018	0.0628389			177		328.5
178	695661	4620.5	1.64876			178		240.5
179		4646.25				179		205.75
180		2203				180		132
181	608488	790.043	0.189781			181		0
182		364.75				182		1595.5
183	417789	993.75	0.251944			183	1.07892e+06	262	0.09
184		58.8461				184		707.75
185	976812	335.145	0.0343101			185	1.06784e+06	0	0.225
186	417789	2258.25	0.540524			186		0
187	880250	2234.25	0.25382			187		125.525
188	770560	424.5	0.334789			188		1145.75
189		555.5				189		231.75
190		1599.75				190		244.75
191	549271	471.5	0.326205			191		380
192		1320.25				192		274.25
193	704798	312	0.225603			193		0
194		210.548				194	1.0759e+06	0	0.121
195		1067.5				195		193.234
196	1.06751e+06	1896.25	0.963333			196		307.628
197		6965.75				197		309.75
198		1156.75				198		208
199		264.962				199		168
200	1.10991e+06	3128.75	0.810383			200		118.723
201		4388.75				201	1.13797e+06	591	0.052
202		1477				202		0
203	827591	575.75	0.132704			203	1.00547e+06	149.25	0.024
204		522.5				204		0
205	475601	0	0			205		0
206	827591	3908.75	0.679842			206		0
207		0				207		0
208		1334.5				208		92.2369
209		383.067				209	1.11333e+06	569	0.051
210	736827	1691.5	0.229565			210		0
211	907558	1185	0.303948			211	1.06147e+06	283.25	0.036
212		1405				212		103.573
213		168.5				213		0
214	905088	418.75	0.45294			214		0
215		724				215		0
216		902.75				216		0
217		2054				217	197529	0	0
218	664203	4127.25	0.684956			218	1.57947e+06	656.75	0.1
219		422.25				219		915.75
220	836341	1786.25	0.270643			220	985922	68.75	0.334
221		477.25				221		948
222	877241	898	0.162128			222		319.5
223		524.25				223		263
224	924621	1671.25	1.0099			224		1569
225		5467.25				225		125.009
226		1285.5				226	985922	0	0.48
227		913.75				227		1298.5
228	1.05723e+06	617.75	0.0584312			228		0
229	885065	3694.25	0.518436			229		345.75
230		894.25				230		261
231	1.07213e+06	1719.75	0.332212			231		241.25
232		1842				232		1247.75
233	1.07226e+06	687	0.136721			233		1337.5
234		418.5				234		0
235		360.5				235	719950	0	0.112
236	1.02053e+06	1844	0.18069			236		0
237	1.07226e+06	3328.5	0.756185			237		43.0782
238		4779.75				238		0
239	1.06104e+06	2800.25	0.966487			239		761
240		1479.75				240	1.06642e+06	0	0.017
241		5818.5				241		181.588
242		156.339				242		0
243	1.13668e+06	691.75	0.0608573			243	833674	212.75	0.294
244	801862	532.25	0.0663768			244		1491.5
						245		401.25
						246		171.5
						247		178
						248	731298	186.535	0.091
						249		124.288
						250		49.0556
						251		134.594
						252		169.75
						253	1.08824e+06	42.3568	0.273
						254		0
						255		346.5
						256		90.0727
						257		0
						258		778
						259		1068.75
						260		641.33
						261	791520	801.25	0.101
						262	1.1418e+06	2236.5	0.303
						263		472.5
						264		334
						265		412.25
						266	889946	0	0
						267		0
						268	1.1418e+06	238.5	0.034
						269		0
						270		153.75
						271		0
						272	985085	164.5	0.025
						273		0
						274		0
						275		78.0149
						276	503210	0	0
						277	1.07122e+06	0	0.053
						278		0
						279		0
						280		0
						281		255.5
						282		308.25
						283	989583	0	0.137
						284		541.75
						285		814
						286	1.00758e+06	214	0.029
						287		0
						288		78.221
						289	843252	268.75	0.032
						290	888681	688.75	0.249
						291		521
						292		826.5
						293		0
						294		180.75
						295	612642	0	0.088
						296		0
						297		0
						298		538.25
						299		0
						300		0
						301	922604	174.889	0.019
						302	926440	0	0.022
						303		200.75
						304	757528	259.25	0.048
						305		43.3874
						306		58.1247
						307	579924	28.7532	0.005
						308		0
						309		0
						310	616485	0	0
						311	817699	252.5	0.075
						312		0
						313		358.75
						314	886701	434	0.182
						315		647.25
						316		326.25
						317		204.75
						318	1.11402e+06	0	0.034
						319		143.251
						320		230.75
						321	508312	0	0.1
						322		60.495
						323		323.75
						324		122.536
						325	916158	0	0.027
						326		250.534
						327	876228	0	0.275
						328		0
						329		0
						330		260
						331		1040
						332		524.75
						333		222
						334		221.75
						335		144
						336		0
						337	422079	174.5	0.041
						338		0
						339	612268	85.5	0.156
						340		51.2198
						341		816.5
						342	459917	603	0.131
						343		0
						344		0
						345	853957	0	0
						346		0
						347		0
						348		0
						349		0
						350	799576	247	0.031
						351	897489	10.9241	0.001
						352	893697	916.5	0.164
						353		372.75
						354		173.5
						355	990997	559.75	0.114
						356		0
						357		356.25
						358		214.75
						359	627436	2947.75	0.47
						360	854702	0	0.006
						361		52.7657
						362	852607	316.25	0.037
						363	550519	129.75	0.063
						364		214.75
						365		0
						366		0
						367	523161	387.25	0.095
						368		0
						369		107.593
						370	34581.1	199.5	1.639
						371		367.25
						372	942480	0	0.058
						373		231
						374		137.75
						375		182
						376	1.16037e+06	205.25	0.058
						377		116.971
						378		355
						379		0
						380	996860	100.997	0.019
						381		0
						382		85.25
						383	1.11698e+06	204.25	0.018
						384		0
						385		0
						386	770905	285	0.037
						387	450013	1336.75	0.604
						388		323.75
						389		0
						390		1059.5
						391	73892.8	0	0.325
						392		240
						393	190442		0
						394	1.01317e+06	255.5	0.025
						395		0
						396	533632	61.9379	0.166
						397		95.5
						398		326
						399		230.5
						400		171
						401	301808	196.75	1.076
						402		1374.75
						403		0
						404		272.5
						405		255.75
						406		1100
						407		47.0975
						408	931756	43.2844	0.014
						409		86.5687
						410		0
						411	1.05517e+06	0	0.011
						412		0
						413		105.5
						414		12.2639
						415		0
						416	671357	99.75	0.015
						417	1.18408e+06	201.25	0.023
						418		70.6978
						419		0
						420		0
						421	554185	0	0.024
						422		131.25
						423	984922	69.4611	0.07
						424		360.75
						425		0
						426		262.5
						427	701311	20.1994	0.021
						428		81.5189
						429		0
						430		43.9027
						431	681756	1127.5	0.69
						432		106.75
						433		220.75
						434		570.75
						435		640
						436		1002.75
						437		884.75
						438		153.66
						439	416829	120.063	0.204
						440		346.75
						441		227.552
						442		154
						443	543269	0	0
						444	831069	0	0.03
						445		251
						446	938339	292.25	0.06
						447		161.5
						448		75.9537
						449		35.6581
						450	411005	76.469	0.043
						451		35.0397
						452		66.4724
						453	877516	0	0
						454	938339	580.5	0.062
						455	712853	193.646	0.052
						456		0
						457		173.653
						458	8.89889e+06	1397	0.017
						459		141.5
						460	800460	394	0.319
						461		582.75
						462		425.5
						463		387
						464		394.75
						465		372.25
						466	761663	0	0
						467		0
						468	694837	0	0.087
						469		0
						470		109.75
						471		496.75
						472	1.0581e+06	118.517	0.064
						473		103.779
						474		110.787
						475		147.75
						476		0
						477		195.295
						478	749158	0	0
						479		0
						480		0
						481	755550	473.75	0.217
						482		945
						483		0
						484		219.5
						485	484908	0	0.138
						486		493.5
						487		174.25
						488	397906	252.5	0.063
						489	703531	293.75	0.058
						490		114.291
						491	851218	0	0.014
						492		116.559
						493		0
						494	529400	261.973	0.049
						495		0
