# Supplementary material for: Coordination between ECM and cell-cell adhesion regulates the development of islet aggregation, architecture, and functional maturation
Source: eLife. 2023 Aug 23;12:e90006. doi: 10.7554/eLife.90006 (PMC10482429; doi:10.7554/eLife.90006)
Supplement: Figure 4—source data 6. [file elife-90006-fig4-data6.xlsx]

## Sheet: Fig 4I
Endocrine area/ Pancreas area
POSTNATAL 0															POSTNATAL 7
			Total															Total
Control (n= 3)	Pancreas area (um)	ChrA area (um)	Pancreas area (um)	ChrA area (um)	ChrA area (%)		Mutant (n= 3)	Pancreas area (um)	ChrA area (um)	Pancreas area (um)	ChrA area (um)	ChrA area (%)			Control (n= 3)	Pancreas area (um)	ChrA area (um)	Pancreas area (um)	ChrA area (um)	ChrA area (%)		Mutant (n= 3)	Pancreas area (um)	ChrA area (um)	Pancreas area (um)	ChrA area (um)	ChrA area (%)
	346785	2006.25						504319	2833.25							145297	69071.5						316228	5264.25
	453505	9270.5						318367	1328.75							566664	1876.5						596193	31032.8
	573841	7848.75						653463	3202.75							291067	10491.2						635881	21127
	603579	14528.6						660171	12713							200564	1622.25						906781	62547.8
	549593	4338						380617	2980							425319	4143.75						767096	25409.5
	567148	7611						579693	4799.25							551235	56161.8						382905	14154.5
	461995	11696.8	3.55645e+06	57299.8	1.61115			809107	3562							380319	41745.8						574853	32266.2
	459557	4026.5						114753	1965.75							193160	3395.25						237380	8670.75
	793619	35569.6						616241	4733.5	4.63673e+06	38118.2	0.822093				566964	3800.25						147872	4428
	627875	13932.8						465407	10445.5							251458	15968.2						258413	2794.75
	728611	69110.2						404526	9666.5							387596	5393.75						113197	1211
	775720	3341.5						868740	42259.2							377540	7093.75						225764	13896.5
	389202	2930.5						616671	26029							276125	4823.25						512691	5472
	666648	12730.5	4.44123e+06	141642	3.18924			468093	22349.2							266727	2015						265985	5332
	528377	18653						506741	4067.25							319853	7159.25	5.19989e+06	234762	4.51474			237248	6158.5
	155307	4572.25						224632	5161.25							325672	4529						361979	4201.25
	389865	5900	1.07355e+06	29125.2	2.71299			837588	16070.2							261957	8017						317529	15399	6857995	259366	3.78195
	474226	8137.75						403585	3111.75							120774	7175.25						241175	4531
	464404	11374.8						682876	18965	5.47886e+06	158125	2.88609				515406	5178.75						585060	16844.5
	881583	26434.8						653593	17008.8							450395	59413.2						644347	34778.2
	686635	26063.2						580819	27035.8							610435	5500						485099	27462.5
	679678	38856.2						524766	31853							779356	31990						393228	4856.75
	384795	9891.25	3.57132e+06	120758	3.38133			341105	32459.2							246160	4297						396293	2687.25
	702315	10445.5						460355	7984							481887	12904.2						663604	74772
	695464	28450.8						848049	20248.2							89476	190.5						214051	4871
	743903	7950						609060	19398.2	4.01775e+06	155987	3.88246				174579	4128						468117	46348.8
	649644	6336.5						641137	27971.5							220135	1561.25						196137	1188.75
	633367	26162.6						357491	20476							63313.7	1519.5						267959	21598.5
	561090	9462	3.98578e+06	88807.4	2.2281			284040	6373							221728	8218	4.56127e+06	154622	3.38988			375380	6786.75
	851338	39767.8						490914	5916							501369	25961						399120	8728.5
	550436	31236.8						526748	18329.5							676576	53891.8						129882	2867.5
	832307	17722						415606	21790.2	2.71594e+06	100856	3.7135				632383	57350.8						412059	33602
	806471	37647						579152	25077							692635	29628.5						280399	3168.25
	908102	17925.8						455559	23365							296295	3881.75						745816	51616.2
	214406	9630	4.16306e+06	153929	3.6975			284080	4373.25							297081	2431.75						164264	5576.25
	744569	29662.8						140875	2613.25							243375	5704						228562	0
	671738	11024.8						470475	9004.25							161451	1473.75						436956	16474.8	7.72751e+06	368760	4.77204
	1.07922e+06	42819.5						674023	8058.5							150539	6898.25						360079	3167.75
	929403	56598.9						780136	19642.8							330014	14263.2	3.98172e+06	201485	5.06025			743162	29347
	822858	28761.5	4.24779e+06	168867	3.97542			140898	1683.75	3.5252e+06	93817.8	2.66135				483609	16349.5						727462	44854.2
	419933	5332.25						743355	35240.5							474461	13458.5						353524	19486
	654645	11726.2						355935	21222.8							670124	41516.8						153917	3781.5
	517933	8686.25						214837	2490.25							527983	14045.2						383056	14089.8
	255600	4195.25						338941	3845.75							407482	2090						170742	3109.25
	317353	1434.5						462116	9820.75							503812	11176						440244	13520
	147687	2120.5						624472	18490.5	2.73966e+06	91110.5	3.32562				142967	714.25						283819	6226
	684420	10518.2						286954	4738.25							155313	0						375957	5578
	790570	15018.8						290753	2504.5							150922	0						222765	895.25
	526500	14942.8	4.31464e+06	73974.8	1.71451			645091	16136.2							338233	851.25						218425	1903.5
	750826	12313						650017	8693.75							127597	389.75						216388	3958.5
	694141	14367						757728	18526.8							76643.4	0						268710	10644.8
	730236	12359.5						511758	10857							107933	0						387117	7350
	275008	7630.75						367677	10305.8	3.50998e+06	71762.2	2.04452				256742	1780						170156	3180.75
	288149	3272.5						765458	11076							17754.2	0	4.44158e+06	102371	2.30484			381086	25161.2
	410379	2272						754148	12868.8							571748	5510.75						330554	19774
	674804	6860.75						305914	3934.5							557838	7777.75						122042	3279	6.30921e+06	219306	3.47598
	646709	3252						606292	38359.2							163991	180.75						180508	431.25
	455110	14676	4.92536e+06	77003.5	1.56341			464496	5439.5							342742	3241.75						477787	3216.25
	685758	34688.2						681378	45776.2							315073	0						811892	42177.5
	950663	43518.8						494482	5037.5							101934	0						465676	29694.8
	900255	124032						468137	7758.5							107301	0						283672	6551.25
	265524	7438						563332	22431.8							64302.2	0						452046	12740.5
	835170	55774.2	3.63737e+06	265451	7.29789			687555	29263.2	5.79119e+06	181945	3.14176				61707.4	0						283687	4699.5
	636837	4256						671049	21576							164680	778.5						166436	1820.25
	734139	15985.2						812864	29012.2							158003	0						281392	443
	811960	31461						414976	19217.5							71329.1	0						206234	2219.75
	848730	62699.8						432576	38156.8							57361.7	325.25						228869	0
	592543	9992.5						251907	1767							148177	1303.5						254367	0
	381938	14681.2						548437	8286.75							113159	2713.75						115498	260.25
	422917	13577.5	4.42907e+06	152653	3.44662			583437	14312							168482	2972	3.16783e+06	24804	0.782997			173275	0
	570484	6022						325369	2816.25							285237	691.25						255218	4151.75
	454378	2303.75						596064	19260.2							160559	0						136859	1284.75
	637639	2525.5						649320	29419.8	5.286e+06	183824	3.47757				127702	0						263859	2365.5
	736041	21945						734913	49566.5							230471	0						266354	2492
	645939	13578.8						499836	36952.2							85239.5	304.5						94057.5	2076.75	5.39769e+06	116625	2.16065
	595044	9919	3.63953e+06	56294	1.54674			539689	14841							362325	5419.75						387186	5032
	642073	7045.5						413073	6411.25							230510	1632.25						633484	24861.8
	793713	27713.8						482683	14672							516399	15131.5						306994	14260
	680835	5810.25						904966	19791.5							71650	547.75						22181.8	0
	636313	21343.8						712635	18523.2							441778	1172.75						120380	0
	728118	3456						301625	3823.75	4.58942e+06	164582	3.58611				366275	908						464101	6859.25
	641679	10703.8						564131	50086.8							376983	10381.6						25691.9	0
	870571	55724.5						531980	15219							673236	5051.04						14197.5	0
	283658	4332.25	5.27696e+06	136130	2.5797			238979	3761.75							890277	34491.2						42420.9	0
	711627	18903.8						382740	6270.25							333931	1577.25						47784.1	0
	843248	36278.2						533270	5721							273711	9044.39						175256	6553.25
	752546	63595.5						577331	13598.2							541863	15379						173446	2084.25
	691766	7902.75						310172	3790.25							147623	2449.89						176209	542.5
	559848	19485.8						532457	11065.2	3.67106e+06	109512	2.98313				208537	6321.5						80807.4	182	2.67014e+06	60375	2.26112
	274353	2350.5						591713	16309.2							91952.9	0						428346	5759.25
	541243	14684.8						548766	16600.5							20536	0	6.4368e+06	110504	1.71675			428564	18595.8
	721765	8319.5						396421	2760							420474	15749.2						453886	30828
	640558	25192	5.73695e+06	196713	3.42887			364357	9450							277892	4005.5						321630	4141.75
	592390	11816.4						591649	7853.5							389058	17708.8						528421	37567
	801101	30537.8						442357	8864.75	2.93526e+06	61838	2.10673				202623	406						594255	57763
	436871	6132.75						145858	2249.75							130037	0						441958	29605.8
	498313	51433.3						373836	446							110288	618.5						278032	1252.25
	556745	76067.2						650815	7473.75							233468	0						527486	27861.2
	360723	5067						711161	20222.8							266714	2042.75						391456	14747.8
	519862	16133						856116	6883.5							504109	11070.8						218467	3390.5
	676811	15125.5						409910	1965.5							495524	8418.5						220603	4389.75
	528107	8287.25	4.97092e+06	220600	4.43781			603289	8852							291219	4626.5						189030	10594.8
	729720	22576						685535	4558.25	4.43652e+06	52651.5	1.18677				292490	12342						337438	13350.5
	727432	27788.5						551680	45648.8							564926	10910.2						277844	1132.75
	372070	17533.5						662270	36458.5							771853	29866.8						347980	28405.5
	387326	2468.75						675614	43581							634726	16846						356769	6282.5
	337627	3661						401970	10496							457862	22789						103600	2366.5
	431400	11932.2						903734	35598.5							378896	14577.2						544168	9771.75
	647859	4907.25						439495	11097.8							479698	32212.8						445076	6747
	260309	2630	3.89374e+06	93497.2	2.40122			673901	23255.8	4.30866e+06	206136	4.78423				251539	9533.15						248946	12695.2
	755557	14334.4						666263	21875.2							112382	0						198514	3536.75
	351018	3436						672959	30518							45465.5	0						46426.4	290.5
	244825	1255.75						487735	25323.2							127891	7191	7.43914e+06	220915	2.96963			226996	2574.5	8.15589e+06	333650	4.09091
	299453	5934.25						529522	21081.2							602300	26918.2						199408	0
	247780	5498.75						783315	18798.5							526293	15883						110358	0
	167873	394.5						442669	17853.5							629234	30287.2						691153	33312.8
	628483	13912.8						625656	26054							490338	13196.8						561944	31630.2
	506527	7976.5	3.20152e+06	52742.9	1.64744			458150	11682							58688.2	0						844649	70491.5
								238254	8569.25							573120	17409.2						156515	78
								413586	6900	5.31811e+06	188655	3.54741				280457	6101.75						479377	38463.2
								721232	26769.5							205688	0						198662	1999.5
								571052	21030.2							118939	882.25						458956	22637.8
								334170	13545.5							42755.3	0						569487	12640
								513918	13272							242094	3122						346091	11403
								680775	31075.8							74255.1	0						374009	11678.2
								447927	7209							168769	5331.25						513954	15780.2
								470228	23953.5	3.7393e+06	136856	3.65992				201127	0						535441	28294.5
								374363	8664.25							566445	7656.5						596135	19587.5
								792619	35548							411762	4425.25						435308	5512.75
								290164	5382.75							492280	10314						766802	14867.5
								370414	3916.75							421710	421.25						741745	34430.8
								606572	12535.8							290622	7956.75						336845	14443.8
								541667	10924							168666	0						477817	14461.2
								585202	9600	3.561e+06	86571.5	2.4311				34508.8	132	6.60005e+06	150038	2.27328			375856	5189.5
								489518	7123.5							566977	49200						528606	36436.5
								426759	1027.5							668012	19378.3						181144	3318
								737486	12026.5							360310	16354.5						116609	874.75
								313847	16974.8							748619	46427.5						28430.6	0
								183612	1002.75							665773	51568.8						115629	1743	1.07409e+07	429274	3.99662
								486965	9254.5							361648	4551.5						274722	2069.75
								524567	8004							30121.2	0						484629	13112
								635686	18087.5							236447	8393.75						816344	39321
								698906	21437.2	4.49735e+06	94938.2	2.11098				134442	2193.75						769289	37323
																85585.3	0						322160	2585.5
																69963.6	727.75						502329	12482.2
																102891	0						182794	5012.25
																340900	3460.25						416673	10525.8
																88624.5	3374.25						336905	4450
																229906	2589						201114	2862.25
																174766	0						418151	4132
																72251.3	0	4.93724e+06	208219	4.21732			450418	3052.5
																583062	27086.8						303459	0
																545784	58322.2						130425	1208.25
																283904	0						291562	1815.25
																613518	61363						404423	22490
																583233	16555.8						294889	10378.2
																26410.1	0						740944	48800.2
																339677	6218						192885	9374.25
																188525	7485.71						254821	2571.75
																191984	4887.75						435080	7147.5
																8150.65	0						52284.8	0
																100158	0						278405	2199.75
																135556	0						634120	36910.2
																94778.7	0						213159	14354.8	9.40198e+06	294178	3.1289
																32508.6	1270.25						178078	657.5
																12654.7	0	3.7399e+06	183189	4.89824			468290	3285.5
																149594	338.75						804488	39731
																200773	4644.75						462400	29464
																118562	4054.75						281012	6983.25
																241308	5819.25						445814	14660
																103213	0						278540	4791.25
																175552	641.75						163975	1779.5
																151340	229.5						276515	561
																112586	2053.25						202650	2530
																55298.7	0						223623	161
																540533	13932.8						250235	0
																276441	2903.75						112340	0
																286049	1815.75						168743	404
																481928	1976.25						248548	4360.25
																221292	5638.25						132424	1810.25
																351074	7285.25						256762	2346
																171775	0						259172	2771.75
																67672.8	0						92144	1883.25	5.30575e+06	118180	2.22738
																569856	18737.7						387186	5525.75
																726155	39916.8						633484	26450.8
																89487.5	0						306994	14178.5
																264081	10009.2						22181.8	0
																302918	5818.5						120380	0
																646778	38799						464101	6713.75
																182373	13285.5						25691.9	0
																159298	210.25						14197.5	0
																79243.6	0						42420.9	0
																118631	0						47784.1	0
																209106	2990.25						170909	6755
																172719	227.75						170322	1956
																285376	5796.5						173722	665.25
																223145	634.75						78697.4	95.25	2.65807e+06	62340.2	2.34532
																196727	3489.25						358103	15447
																66509.3	85.75						391398	6929.25
																152041	1872.75	8.14944e+06	193208	2.37081			531234	43936.7
																260320	3962.25						488199	41665.8
																371393	6917						445341	15128.5
																71213.5	0						173449	3177.5
																254762	5800						526264	38997.8
																218157	1383.25						483212	47351.8
																80664.9	170.25						661144	46328.5
																80206.3	897.25						513684	65774.8
																171447	1774.5						191559	604.75
																460272	34585.8						171999	18220
																443502	14209						414703	0
																314929	3907.25						249948	2314.25
																167727	323						272863	1308.75
																378329	6857.25						194609	3991.25
																146871	1991						248971	2584.75
																465956	11614.5						263387	0
																187700	752						84508.6	2165.75
																301084	10664.2						235673	6057.25
																102736	0						394833	11793.2
																210663	9562.5						377844	13111.2
																256722	1694.5						305266	7485
																238207	2097						336709	4264
																185564	343.5						185309	1507.5
																108753	1459	5.47718e+06	120965	2.20853			338769	0
																154665	1469.25						41496.9	0
																402498	7820						433816	12686.2
																188172	1623.75						190788	9564.25	9.50508e+06	422396	4.44389
																329738	27680.8						243706	8707
																222137	3134.5						503479	17195.2
																411216	28969						340669	3056.75
																192172	3851						640381	28922.8
																399734	45270.8						702741	39275.5
																273757	197						107088	674.25
																411682	1770.75						452149	6148.75
																230362	227.5						136559	1002
																55058.1	0						533043	27303.2
																167138	0						215943	667.5
																314482	17457.5						413912	39596.5
																90367.9	0						72904.3	567.25
																178088	921						264103	2657.5
																284336	7046						170669	301.25
																100831	2774						350349	23881.5
																137429	529.75	4.54386e+06	150742	3.3175			319993	3323
																448018	23173						263655	1232.5
																234143	4619						277211	4276
																635598	52851.8						107282	4603.75
																377484	22667.2						482168	14930.2
																514150	39513.2						338530	8084	6.93653e+06	236406	3.40814
																167619	1547						424275	2933.75
																280221	2576.5						573050	36387
																96399	370.25						702612	42802
																63593.8	0						351897	15250.2
																60440.8	0						39629.3	248.25
																38815.8	0						251967	1932.5
																15846.6	0						145237	305
																205958	760						431374	5741.75
																24222.8	0						85034.6	0
																152079	623.75						242823	1314.5
																153823	298.25						322574	5984.5
																52763.6	0						2.26226e+06	10145
																79155.1	612.5	3.60033e+06	149612	4.15552			88887.7	0
																632649	17752						408843	10714.8
																159370	4247						399585	33110.8
																664460	0						286102	20298.5
																139291	334.25						17347.1	0
																89607.5	1225						251317	0	7.28481e+06	187168	2.5693
																227006	0						117927	418.5
																49655	0						521917	14957
																29517	0						36207.4	558
																102258	406.25	2.09381e+06	23964.5	1.14454			489043	7770.5
																							230296	3385
																							69040.4	0
																							131101	2621.25
																							6126.59	0
																							89229.1	0
																							118965	1170
																							50048.9	0
																							8880.3	0
																							247530	6048.5
																							191422	4507.75
																							311887	9401	2.61962e+06	50837.5	1.94064
																							568217	27363
																							532252	20137.8
																							243856	5426.5
																							45625.8	0
																							170843	1463.5
																							48166.6	927
																							39420.9	0
																							7453.77	0
																							96541.4	8298.25
																							148644	1378	1.90102e+06	64994	3.4189
