# Supplementary material for: Coordination between ECM and cell-cell adhesion regulates the development of islet aggregation, architecture, and functional maturation
Source: eLife. 2023 Aug 23;12:e90006. doi: 10.7554/eLife.90006 (PMC10482429; doi:10.7554/eLife.90006)
Supplement: Figure 4—source data 7. [file elife-90006-fig4-data7.xlsx]

## Sheet: Fig 4J
Glucagon area/ Pancreas area															POSTNATAL 7
POSTNATAL 0																		Total
			Total												Control (n= 3)	Pancreas area (um)	Gcg area (um)	Pancreas area (um)	Gcg area (um)	Gcg area (%)		Mutant (n= 3)	Pancreas area (um)	Gcg area (um)	Pancreas area (um)	Gcg area (um)	Gcg area (%)
Control (n= 3)	Pancreas area (um)	Gcg area (um)	Pancreas area (um)	Gcg area (um)	Gcg area (%)		Mutant (n= 3)	Pancreas area (um)	Gcg area (um)	Pancreas area (um)	Gcg area (um)	Gcg area (%)				145297	33301.2						316228	2189.25
	346785	405.75						504319	728							566664	854.5						596193	8740.75
	453505	3171.75						318367	389.25							291067	5129.5						635881	5286.75
	573841	3052						653463	974.5							200564	885						906781	15710.8
	603579	6384.75						660171	3277.25							425319	2279.5						767096	6821
	549593	880.75						380617	1646							551235	23829.5						382905	4950
	567148	2970.25						579693	786.5							380319	19020.8						574853	7971.75
	461995	1438	3.55645e+06	18303.2	0.51465			809107	607.75							193160	1340.75						237380	2440.5
	459557	1579.25						114753	280.5							566964	1783.25						147872	1591
	793619	17076						616241	200	4.63673e+06	8889.75	0.191725				251458	1943.25						258413	356.5
	627875	6887.75						465407	2051.75							387596	1570.75						113197	357.5
	728611	32872.2						404526	2161.75							377540	1002.75						225764	3078
	775720	636.5						868740	12791.8							276125	2340.75						512691	303.25
	389202	868.25						616671	8502.5							266727	1019.75						265985	413.5
	666648	5943.75	4.44123e+06	65863.8	1.48301			468093	6969							319853	3136	5.19989e+06	99437.2	1.9123			237248	1331.25
	528377	6826.75						506741	471.5							325672	246						361979	218.5
	155307	1927.5						224632	1497.75							261957	3445.75						317529	1353.25	6857995	63113.5	0.920291
	389865	2553	1.07355e+06	11307.2	1.05326			837588	1579							120774	3206						241175	840.75
	474226	3386.75						403585	171							515406	2788						585060	5096
	464404	4758.5						682876	1708.5	5.47886e+06	37904.5	0.691832				450395	24680.2						644347	8893.25
	881583	11859.8						653593	5798.25							610435	2785.25						485099	6142.75
	686635	13025.5						580819	7678.25							779356	13981						393228	739.75
	679678	11977.8						524766	9367.5							246160	794.75						396293	765.25
	384795	3313	3.57132e+06	48321.2	1.35304			341105	9569.75							481887	1619.5						663604	17066.8
	702315	4978.5						460355	1264.5							89476	99.5						214051	1154.25
	695464	13703.8						848049	2484.5							174579	2068.25						468117	12121.8
	743903	2002.5						609060	3155.75	4.01775e+06	39318.5	0.978621				220135	0						196137	95.25
	649644	2476						641137	12519.5							63313.7	495.75						267959	3682
	633367	9176.25						357491	8261.25							221728	3842.75	4.56127e+06	60052.8	1.31658			375380	1544
	561090	2898.75	3.98578e+06	35235.8	0.884036			284040	2427.5							501369	10088.2						399120	1109.25
	851338	18801.2						490914	507.5							676576	12419.8						129882	682.75
	550436	13858						526748	2147.5							632383	22178						412059	7808
	832307	4634						415606	3900.75	2.71594e+06	29764	1.0959				692635	10364.5						280399	510.75
	806471	10206						579152	10936.2							296295	1964.5						745816	5954
	908102	7189.75						455559	11321.2							297081	1224.25						164264	1838
	214406	2292.5	4.16306e+06	56981.5	1.36874			284080	1865.5							243375	1113						228562	0
	744569	4287.5						140875	662.75							161451	481.75						436956	1634.75	7.72751e+06	77679.2	1.00523
	671738	1479.5						470475	2284							150539	3302						360079	1606.75
	1.07922e+06	9663						674023	667							330014	3563.5	3.98172e+06	66699.5	1.67514			743162	10875.8
	929403	13175						780136	3687.25							483609	6793.25						727462	14450
	822858	4657.5	4.24779e+06	33262.5	0.783054			140898	246	3.5252e+06	31670	0.89839				474461	5729.25						353524	6574
	419933	1446.25						743355	11646.2							670124	16327.8						153917	1426.75
	654645	3496						355935	7188.25							527983	4818.75						383056	5072.25
	517933	3068						214837	591.25							407482	1125						170742	1214.25
	255600	1295.75						338941	1623							503812	4923						440244	4028.25
	317353	217.5						462116	953.25							142967	377.75						283819	2137.25
	147687	677						624472	6101.75	2.73966e+06	28103.8	1.02581				155313	0						375957	616.5
	684420	2569.25						286954	1675.5							150922	0						222765	375.25
	790570	2790						290753	561							338233	196.25						218425	910.5
	526500	3644	4.31464e+06	19203.8	0.445083			645091	5278.75							127597	215.25						216388	1736.25
	750826	4416.75						650017	2789.5							76643.4	0						268710	4845
	694141	4677.75						757728	3451.5							107933	0						387117	981.25
	730236	5188.5						511758	3414.25							256742	914.75						170156	1294.25
	275008	1112.25						367677	2123.5	3.50998e+06	19294	0.54969				17754.2	0	4.44158e+06	41421	0.932574			381086	2630
	288149	1511						765458	4290.25							571748	2561.75						330554	5593.25
	410379	0						754148	5397.5							557838	3469						122042	226	6.30921e+06	66593.5	1.0555
	674804	967.5						305914	1396							163991	180.75						180508	67.5
	646709	224.25						606292	13005.8							342742	1354.5						477787	1237
	455110	3058.75	4.92536e+06	21156.8	0.429547			464496	1410.5							315073	0						811892	13045.2
	685758	12474.8						681378	8644							101934	0						465676	9630
	950663	15128.8						494482	1703							107301	0						283672	1666.75
	900255	51873.2						468137	3428.25							64302.2	0						452046	3404
	265524	1517						563332	5090.25							61707.4	0						283687	1161.25
	835170	19305.2	3.63737e+06	100299	2.75746			687555	6917	5.79119e+06	51282.5	0.885526				164680	125.5						166436	709.25
	636837	354.75						671049	6803.5							158003	0						281392	47.75
	734139	4917.75						812864	6664.5							71329.1	0						206234	389.75
	811960	12750.8						414976	5750.75							57361.7	0						228869	0
	848730	20535						432576	12482.2							148177	610.5						254367	0
	592543	2098						251907	258.25							113159	1096.5						115498	194
	381938	3293						548437	2041.75							168482	1594	3.16783e+06	10992.5	0.347004			173275	0
	422917	2245.25	4.42907e+06	46194.5	1.04299			583437	328.25							285237	330.25						255218	1123.5
	570484	2137.75						325369	725							160559	0						136859	0
	454378	1031.25						596064	3964.75							127702	0						263859	0
	637639	1010.75						649320	3851.75	5.286e+06	42870.8	0.811024				230471	0						266354	158
	736041	7899.25						734913	17001.2							85239.5	34.75						94057.5	626.75	5.39769e+06	33460.8	0.619909
	645939	4580						499836	9426.25							362325	2389.25						387186	1628.5
	595044	2160.5	3.63953e+06	18819.5	0.517087			539689	5581							230510	598.75						633484	8957.75
	642073	1003						413073	720							516399	5163.5						306994	5753.5
	793713	13905.2						482683	4399							71650	357						22181.8	0
	680835	2439.75						904966	1562.5							441778	227						120380	0
	636313	9932						712635	3621.25							366275	183.75						464101	3332.25
	728118	1614.25						301625	51	4.58942e+06	42362.2	0.923041				376983	3681.25						25691.9	0
	641679	5087.25						564131	19939							673236	426.969						14197.5	0
	870571	16530.5						531980	5159.5							890277	6861.5						42420.9	0
	283658	891.25	5.27696e+06	51403.2	0.974107			238979	1357.25							333931	406.5						47784.1	0
	711627	5630						382740	2244							273711	2836.5						175256	1169
	843248	15778.5						533270	297							541863	2899.25						173446	0
	752546	31442.8						577331	4578.25							147623	468.25						176209	107.5
	691766	2557.5						310172	331.75							208537	786.75						80807.4	0	2.67014e+06	20948.5	0.784547
	559848	8347.25						532457	1679.75	3.67106e+06	35586.5	0.969379				91952.9	0						428346	1451
	274353	616.75						591713	6698.75							20536	0	6.4368e+06	27651.2	0.429581			428564	5186.25
	541243	2900.5						548766	5864.5							420474	4887.25						453886	7857.25
	721765	3051.75						396421	674							277892	504						321630	1382
	640558	4678.5	5.73695e+06	75003.5	1.30738			364357	3323.25							389058	7389						528421	11292
	592390	4435						591649	1016.75							202623	56.25						594255	13911.5
	801101	14678.2						442357	1419.5	2.93526e+06	18996.8	0.647191				130037	0						441958	5609.25
	436871	2723.5						145858	1081.75							110288	206						278032	373.25
	498313	21312.8						373836	205.5							233468	0						527486	4487
	556745	26828						650815	2462.25							266714	747						391456	2280.5
	360723	2277.5						711161	7371							504109	4053.25						218467	746.75
	519862	3661.75						856116	1112.5							495524	1715.5						220603	1059
	676811	4981.5						409910	351.5							291219	1465.75						189030	3114.75
	528107	1489	4.97092e+06	82387.2	1.65738			603289	2166.5							292490	3813.75						337438	2885.25
	729720	8862						685535	1328	4.43652e+06	16079	0.362424				564926	1996.5						277844	80.25
	727432	10004.8						551680	16218.2							771853	4233.75						347980	6835
	372070	6980.75						662270	14823.2							634726	2555.25						356769	557.25
	387326	1562						675614	20152							457862	3652						103600	60.75
	337627	1069.5						401970	4193.5							378896	4389.5						544168	1008.25
	431400	2048.75						903734	5940.25							479698	7253.25						445076	410.75
	647859	847.75						439495	4593.75							251539	1010.75						248946	3132
	260309	286.25	3.89374e+06	31661.8	0.813144			673901	3868.5	4.30866e+06	69789.5	1.61975				112382	0						198514	384.75
	755557	6030						666263	7761.5							45465.5	0						46426.4	145.75
	351018	852.25						672959	11651.2							127891	670.25	7.43914e+06	50599	0.680173			226996	101.25	8.15589e+06	74351.8	0.911632
	244825	261.5						487735	9417.25							602300	9054.25						199408	0
	299453	1561.25						529522	9389							526293	5329.5						110358	0
	247780	2042.25						783315	1875							629234	8793.5						691153	6853.75
	167873	0						442669	6653.5							490338	3217						561944	6466.25
	628483	1649.25						625656	4897.5							58688.2	0						844649	13285.2
	506527	1508.25	3.20152e+06	13904.8	0.434318			458150	1360.5							573120	5594.75						156515	78
								238254	3772.25							280457	2107.25						479377	6864.75
								413586	742	5.31811e+06	57519.8	1.08158				205688	0						198662	620.75
								721232	6689.5							118939	507.5						458956	5074.75
								571052	8943							42755.3	0						569487	2623.5
								334170	3671							242094	1631.75						346091	2779.5
								513918	2400.5							74255.1	0						374009	3297
								680775	1780.25							168769	1702.25						513954	4057.5
								447927	2510.75							201127	0						535441	5914
								470228	1575.5	3.7393e+06	27570.5	0.737317				566445	3188						596135	3587.25
								374363	2412							411762	1383.75						435308	708.25
								792619	8764.75							492280	1318.5						766802	1206.5
								290164	1441.75							421710	0						741745	2525.5
								370414	364.75							290622	2410						336845	3746.75
								606572	1229.5							168666	0						477817	1329
								541667	620.5							34508.8	0	6.60005e+06	46238	0.70057			375856	286.5
								585202	2384.75	3.561e+06	17218	0.483516				566977	12604.2						528606	2468
								489518	1088.75							668012	5644.75						181144	239.25
								426759	244.75							360310	5431.75						116609	188.25
								737486	4711.5							748619	15489.8						28430.6	0
								313847	7413.5							665773	15774.2						115629	0	1.07409e+07	74200.2	0.690818
								183612	131.5							361648	1819.5						274722	866.25
								486965	1156.5							30121.2	0						484629	3968.75
								524567	2881.5							236447	3599.5						816344	8085.75
								635686	2352.75							134442	492.25						769289	5994.5
								698906	6673.5	4.49735e+06	26654.2	0.592666				85585.3	0						322160	712.75
																69963.6	210						502329	2301.25
																102891	0						182794	793.25
																340900	832.5						416673	2008.25
																88624.5	847.75						336905	664.75
																229906	503.5						201114	689
																174766	0						418151	1428
																72251.3	0	4.93724e+06	63249.8	1.28108			450418	982.5
																583062	9935.5						303459	0
																545784	21436.8						130425	133.75
																283904	0						291562	61.25
																613518	22117.8						404423	1273.25
																583233	6352.5						294889	159
																26410.1	0						740944	3276.5
																339677	1912.5						192885	489.75
																188525	2525.86						254821	58
																191984	2066						435080	444.5
																8150.65	0						52284.8	0
																100158	0						278405	138.5
																135556	0						634120	2720
																94778.7	0						213159	1210.25	9.40198e+06	38459.8	0.40906
																32508.6	523.75						178078	168.75
																12654.7	0	3.7399e+06	66870.6	1.78803			468290	1342.25
																149594	195.5						804488	11889.2
																200773	1816.25						462400	8456.75
																118562	1805.75						281012	1730.75
																241308	2206.5						445814	4665.25
																103213	0						278540	1043.75
																175552	321.5						163975	787
																151340	0						276515	225.25
																112586	1026						202650	389.75
																55298.7	0						223623	69.25
																540533	4596.25						250235	0
																276441	985						112340	0
																286049	71.75						168743	344
																481928	104.75						248548	1181.75
																221292	622						132424	0
																351074	2267						256762	0
																171775	0						259172	257.25
																67672.8	0						92144	505.25	5.30575e+06	33056.2	0.623027
																569856	2350.5						387186	3708.25
																726155	6321.75						633484	10625.5
																89487.5	0						306994	5418.5
																264081	4131						22181.8	0
																302918	390.5						120380	0
																646778	2479						464101	3220
																182373	1299.25						25691.9	0
																159298	71.75						14197.5	0
																79243.6	0						42420.9	0
																118631	0						47784.1	0
																209106	1227.5						170909	1277.75
																172719	87						170322	0
																285376	579.5						173722	105.25
																223145	0						78697.4	0	2.65807e+06	24355.2	0.916275
																196727	843						358103	4930.25
																66509.3	85.75						391398	2296.5
																152041	333	8.14944e+06	36217.8	0.44442			531234	9222.75
																260320	1976.5						488199	7300.75
																371393	3451						445341	3809.25
																71213.5	0						173449	1131
																254762	2236.25						526264	10418.2
																218157	911.25						483212	11405.8
																80664.9	41.25						661144	10864.8
																80206.3	240.5						513684	16790.8
																171447	779.5						191559	321.25
																460272	10835.2						171999	5825.25
																443502	7143						414703	0
																314929	773.5						249948	401.25
																167727	0						272863	48.25
																378329	581.75						194609	1915.25
																146871	1023.5						248971	270.25
																465956	1925						263387	0
																187700	319.25						84508.6	429.5
																301084	1083.25						235673	490
																102736	0						394833	1646.75
																210663	3488.5						377844	3898.5
																256722	46.5						305266	2575.75
																238207	546						336709	1653
																185564	0						185309	68.25
																108753	373.75	5.47718e+06	37775.5	0.689689			338769	0
																154665	557.5						41496.9	0
																402498	3529.5						433816	692
																188172	822						190788	550.5	9.50508e+06	98955.8	1.04108
																329738	10009.2						243706	2501.25
																222137	1522.5						503479	4654.75
																411216	11102.5						340669	919.25
																192172	1217.5						640381	7342.25
																399734	14820						702741	8483.25
																273757	0						107088	488
																411682	166.5						452149	1609.5
																230362	0						136559	528.5
																55058.1	0						533043	8020.75
																167138	0						215943	79.75
																314482	3462						413912	13828
																90367.9	0						72904.3	71.25
																178088	652.75						264103	101.25
																284336	1277.75						170669	80
																100831	600.5						350349	6767.25
																137429	197.75	4.54386e+06	49938	1.09902			319993	537
																448018	7739.5						263655	319.25
																234143	1847.25						277211	1022.5
																635598	19207.5						107282	1461.5
																377484	7537.75						482168	960.5
																514150	13002.8						338530	1044.75	6.93653e+06	60820.5	0.876814
																167619	707.75						424275	1131.5
																280221	282						573050	9883
																96399	126.25						702612	9394.5
																63593.8	0						351897	4565.5
																60440.8	0						39629.3	0
																38815.8	0						251967	436.75
																15846.6	0						145237	38.75
																205958	248.25						431374	2424.25
																24222.8	0						85034.6	0
																152079	112						242823	72.75
																153823	0						322574	1064.25
																52763.6	0						2.26226e+06	3623.5
																79155.1	292.5	3.60033e+06	51103.5	1.41941			88887.7	0
																632649	6981.25						408843	8547.75
																159370	1924.5						399585	4761.25
																664460	0						286102	7222.25
																139291	169.75						17347.1	0
																89607.5	89.25						251317	0	7.28481e+06	53166	0.72982
																227006	0						117927	269.75
																49655	0						521917	3338.25
																29517	0						36207.4	172.5
																102258	237.75	2.09381e+06	9402.5	0.449061			489043	1913.25
																							230296	822
																							69040.4	0
																							131101	328.75
																							6126.59	0
																							89229.1	0
																							118965	469.25
																							50048.9	0
																							8880.3	0
																							247530	716
																							191422	1217.25
																							311887	815.25	2.61962e+06	10062.2	0.384111
																							568217	8437.25
																							532252	6014.5
																							243856	1851.75
																							45625.8	0
																							170843	46.5
																							48166.6	0
																							39420.9	0
																							7453.77	0
																							96541.4	1783
																							148644	345	1.90102e+06	18478	0.972004
