# Supplementary material for: Coordination between ECM and cell-cell adhesion regulates the development of islet aggregation, architecture, and functional maturation
Source: eLife. 2023 Aug 23;12:e90006. doi: 10.7554/eLife.90006 (PMC10482429; doi:10.7554/eLife.90006)
Supplement: Figure 4—source data 8. [file elife-90006-fig4-data8.xlsx]

## Sheet: Fig 4K
Somatostatin area/ Pancreas area
	POSTNATAL 0														POSTNATAL 7
			Total															Total
Control (n= 3)	Pancreas area (um)	Sst area (um)	Pancreas area (um)	Sst area (um)	Sst area (%)		Mutant (n= 3)	Pancreas area (um)	Sst area (um)	Pancreas area (um)	Sst area (um)	Sst area (%)			Control (n= 3)	Pancreas area (um)	Sst area (um)	Pancreas area (um)	Sst area (um)	Sst area (%)		Mutant (n= 3)	Pancreas area (um)	Sst area (um)	Pancreas area (um)	Sst area (um)	Sst area (%)
	453856	387.25						517190	748							582522	6084						291980	139.25
	538159	2929.25						554945	938							292141	1359.25						543092	3274.75
	466858	3070						765819	1216.75							516267	11002.2						43296.1	320.5
	501441	1012.5						697741	1725.75							649922	11989.5						615044	3861.5
	658080	5399.25						286399	162.75							253807	806.75						379249	1180.5
	168122	0						752341	2199							196810	487.25						186933	0
	310333	167.5						699222	1147.75							285975	1619.75						54652.7	554.75
	407237	1487.5						564552	100.5							214758	477						360181	112.25
	396520	472.5						345516	1671							305782	4393						126814	184.5
	629166	4155.25						786248	1045.5							129549	0						119686	0
	419404	3034						516072	732.5							195833	877.75	3.62337e+06	39096.5	1.07901			269994	251.25
	217550	1760	5.16673e+06	23875	0.462			550983	963.5							474731	4579.75						305069	1759.75
	508377	838.25						506673	1725.75	7.5437e+06	14376.8	0.19058				303255	944.5						408696	3855.25
	673552	7810.25						597218	3568.25							596523	11769.8						93308.3	0
	302330	806.75						647369	4596.75							330462	1677.25						142765	432.5
	741227	14751.2						733274	5617.25							428992	4897.75						351256	1917	4.29202e+06	17843.8	0.415743
	562733	4971.75						584080	4682.75							137011	121.25						516797	5568.5
	341784	283.75						146662	0							112386	131						47993.3	0
	539328	1277						450981	1497.25							286697	987.75	2.67006e+06	25109	0.940392			619436	3406.5
	367494	1312.5						579597	523							94502.5	0						299528	1460
	504790	1706.25						440161	1250.75							266973	810.5						242438	1945.25
	372881	690.5						263584	1419.75							349867	909.75						171236	920
	486775	1651.5						638893	1026							202108	852						147790	74
	393645	2190.25						770859	4025.25							483990	2820.25						161116	1029.75
	107313	287	5.90223e+06	38577	0.654			442724	751.1							199545	1768.75						160674	844.5
	526684	1537						368506	655.25	6.66391e+06	29613.3	0.444384				370129	0						276285	2082.75	2.64329e+06	17331.2	0.655669
	852982	4562						606600	3000.5							374973	2369						479076	1156
	884681	10322.8						225342	842.5							554443	0						581768	5722.25
	431990	2770.75						614398	2348.75							305572	0						402262	590.5
	376536	106						381174	2936							759611	0						646054	7738.25
	406237	614.5						322761	1373.75							159925	960.75						478486	4170.5
	254142	0						398848	366							283237	0						341657	380.5
	557410	258.25						434864	583							150703	0	4.55558e+06	10491	0.230289			364179	1900
	361167	510						485828	611.75							274519	753						454070	3191.75
	390702	264						326720	472.25							597601	2382.5						434048	2199.75
	178598	274.75						469995	2199.5							506265	895.75						151271	244.5
	673180	3807.5						331540	444.25	4.59807e+06	15178.2	0.3301				148413	79.5						194025	579.25
	290621	939.25						398361	242.25							236372	0						233595	1023
	239648	924						604538	1579							221666	0						209551	437.75
	84227.4	734.75						327938	280.5							132635	0						362644	0
	139966	631.75	6.64877e+06	28257.2	0.425			325304	695.75							279584	325.25						253546	1977.75
	418351	226						762224	3401.25							460119	963.75						374909	1566
	804192	3342.25						913910	3717.25							194210	64.25						575021	1259.5
	522687	1630.5						288969	225.25							179641	0						453332	1341
	1.00045e+06	10456.8						341096	1623							314567	986.75						347079	1576.5
	1.08534e+06	7084.75						680816	2384.25							293819	2847.5						424024	1209.25
	670102	4694.5						336652	1173.25							567737	2004.75						307207	1171.75
	466838	877.5	4.96796e+06	28312.2	0.57			406219	1479.5							493282	2482.25						315742	2356	8.38354e+06	41791.8	0.498497
	551815	814.25						774794	4701.5	6.16082e+06	21502.8	0.349024				583777	2364.25						859411	3939.5
	260127	314						694639	2391.25							605845	2982.5						697564	5854.75
	525791	1490.5						669818	1600							580148	2689.25						662086	8035
	341979	509.5						303093	1009.5							133892	357.5						489734	4389.5
	415764	523						673702	5932.25							166240	1011.75	6.97033e+06	23190.5	0.332703			572972	627
	696356	1911.75						219003	414							645894	3068						383199	2076.75
	631391	2428.75						461166	1791.25							528453	739.5						429914	1500.5
	192742	3151.75						265245	1249.5							265423	445						514772	2033.5
	316610	518.25	3.93258e+06	11661.8	0.297			491010	926							649853	2693.25						444036	3282.5
	142229	141.25						439967	1288.5							72174.8	0						570164	4299
	144111	267.25						889635	7454.5							229905	144						442204	959.25
	173034	1092.25						364318	1079	5.4716e+06	25135.8	0.459386				372119	70.75						537089	286.25
	173728	428.25						167108	563.75							126181	0						204869	170.25
	128307	319						118284	0							277530	904						546568	1970.5
	196976	810						172584	737.5							101463	450.75						472788	3528.25
	125077	584						191686	1529.75							227222	1424.75						710899	4185.75
	95408.2	310.75						228935	3091							651586	4054						340476	1207.75
	66238.9	208.75						241624	2618.75							298355	819.25						174896	1288.5
	179929	703						184192	640.5							33799.3	0	4.47996e+06	14813.2	0.330656			335038	1823.25
	183882	385.75						149949	501.75							564097	2350						194869	623.25	9.58355e+06	52081	0.543442
	121683	59						169039	1106							463188	764.25						245938	751.25
	925105	107.75						133653	417.5							153523	151						409473	1936
	140125	231.75						172114	1727.25							177478	136.5						601009	3853
	71339	151.5						236623	3066.5							190932	414.25						750048	6667
	151188	267						81984.5	298							110097	142.5						145989	39.75
	121936	215.75						220491	1779.75							204225	0						484117	2093.75
	139111	357.75						52358.6	0							29925.2	0						236882	793.5
	157242	1243.25						110871	384							53461.1	66.5	1.94693e+06	4025	0.206736			383408	934.75
	174054	926.75						74813.5	117.75							439839	1936.75						166941	864.5
	129829	229						181637	408.5							335707	1747						633164	555.75
	95221	0						161904	791.75							153925	0						213936	0
	84745.4	541.75						175967	522.25							217379	102.75						356818	63
	161140	1915.5						176214	323							75734.4	106.75						152824	1420.75
	39368.4	0	4.12101e+06	11497	0.279			151274	674.5							199444	312						460769	2619
	77982.2	0						156373	0							52024.7	0						311946	904.5
	43928.9	0						155747	160.5							79272.6	0						284073	1225
	85988	0						171321	373							94270.2	613.75						606330	5894.75
	149392	140.75						199348	3403.5							190407	0						248222	297.25
	40168.1	121.75						121123	463.5							174715	199.75						378425	1948
	155212	304						123309	447.5							159688	788.75						65901.9	74.5
	162722	319.75						190832	836							109480	0	2.28189e+06	5807.5	0.254504			237113	481.25	7.37333e+06	33417.2	0.453218
	145363	1117.75						191945	825.5														733174	4247.25
	138647	1059.5						227668	591.5														501473	2308.5
	160069	1330.75						140532	997.75														331668	1085
	157775	0						125179	423														73123.6	129.75
	92454.2	134						195956	1091.75														391531	1591.25
	102511	0						66299.1	23.25	5.61894e+06	30936.5	0.550576											408267	1840.25
	103712	151.5						127609	526.25														151616	390.25
	180217	190.75						141595	22.25														166061	105
	126757	195						213335	484														302231	760.5
	103047	0						144731	0														241937	511.75
	152694	200.5						214188	430.75														174310	0
	153189	1045						143063	655.75														224211	126.75
	193448	686.25						204332	177														92225.8	32.25
	111550	135.25						206800	270.75														278677	491.25
	154950	168						172650	187														289669	1423.75
	55932.9	111.75						190682	368.75														152832	365.75
	129855	108.75						239599	2100.5														31326.7	192.5	4.54433e+06	15601.8	0.343323
	176882	412.25						173970	69.25														496231	1573.75
	157951	100.25						206719	618.75														659529	3449.5
	210999	2303.25						144806	101.75														275871	1959.25
	90572.9	0						157921	543.5														520674	1472
	155469	550.25						125130	576														83035.3	0
	172841	1425.25						103493	87.5														106562	466.75
	131750	58						217836	824.25														276109	2365.75
	140390	659.75						216354	33.5														341155	1529.25
	184265	2525.5						85699.8	172														254131	1507.5
	147380	598.5						210919	1059.75														146293	0
	87856.9	222						213904	399														81815.3	322	3.2414e+06	14645.8	0.451833
	172773	1788.5						197815	683
	145159	147						135607	383.75
	79118.7	598.5	5.03097e+06	18910	0.376			162829	100.75
	120925	1033.25						108583	249.5
	126302	271.75						138912	79.75
	172258	417.5						161176	489.5
	144096	321.75						146361	304
	153825	212.25						108804	109.25
	171493	669.25						94450.3	51.75
	197007	5167						150209	130
	98872.1	223.75						145529	443.25	5.40561e+06	12732.8	0.235547
	121746	474.75						422115	2642.5
	199480	1866.25						2010.76	139
	121458	224.5						647534	3679.25
	145177	0						560834	4101
	99835	175.75						233369	159.75
	220480	2325.75						607869	5387
	157758	875.5						782227	1357.25
	158818	33.5						214428	0
	137247	1426.5						495582	1834
	150033	751.25						526382	1686.75
	179501	1040.75						391575	1475
	105931	209.5						798779	3454.75
	148658	0						445234	1308.5
	105732	392.25						266253	488.75
	168303	486						457741	1164
	164387	573.25						630652	3115.75
	132356	633.25						72645	110	7.55523e+06	32103.2	0.424914
	189415	3422						528697	263.5
	115983	38.25						707002	1715.75
	170906	3440.75						750808	5347.5
	94759.1	411.25						524562	4349.75
	163818	351.75						433617	3489.75
	59801.3	248.25						491497	2383
	70308	766						185463	303
	63740	0	4.63041e+06	28483.5	0.615			569317	3446.75
	553497	2504						121634	117.25
	526823	2242.25						706578	4651.5
	831287	7493.5						583690	3265.75
	205569	744						414685	2994.5
	811382	8690.75						333511	1503.75
	416865	2542						582885	2962	6.93395e+06	36793.8	0.530632
	644649	2639.75
	262085	352.5
	620121	3935.25
	344399	0
	281833	210.25
	203641	570.25
	223146	581
	609950	3167.25
	373185	1502.75
	623836	2069.25
	2.9215e+06	1112.25
	439636	1218.25
	398856	1085.75
	169655	275.25	1.14619e+07	42936.2	0.375
