# Supplementary material for: Coordination between ECM and cell-cell adhesion regulates the development of islet aggregation, architecture, and functional maturation
Source: eLife. 2023 Aug 23;12:e90006. doi: 10.7554/eLife.90006 (PMC10482429; doi:10.7554/eLife.90006)
Supplement: Figure 4—source data 9. [file elife-90006-fig4-data9.xlsx]

## Sheet: Fig 4N
TUNEL Postnatal 7
	Cell numbers		Total cells						Cell numbers		Total cells
Control (n= 3)	Ins Total	Ins-TUNEL	Ins + InsTunel	Ins-Tunel	Ins-Tunel (%)			Mutant (n= 3)	Ins Total	Ins-TUNEL	Ins + InsTunel	Ins-Tunel	Ins-Tunel (%)
	10	0							101	1
	1190	1							434	2
	626	0							72	2
	736	0							879	4
	214	0							478	0
	126	0							381	2
	32	0							438	2
	134	0							182	0
	67	0	3136	1	0.0318878				23	1
	159	2							33	0
	189	1							127	0
	851	5							117	0
	721	1							41	1
	514	2							122	1
	125	0							130	0
	553	1							180	1
	25	1							11	0
	50	0							420	3
	51	1							60	0	4249	20	0.470699
	107	2							230	1
	26	0	3387	16	0.472394				401	3
	16	0							324	3
	51	0							601	2
	41	0							156	1
	356	0							312	2
	185	2							229	1
	23	0							107	6
	23	0	697	2	0.286944				31	0
	110	4							29	0
	224	1							141	4
	266	0							40	8
	180	0							137	2
	34	1							98	1
	208	2							68	3
	55	0							179	3
	196	0							278	3
	70	1							157	3
	25	0							146	1
	34	0							55	0	3766	47	1.24801
	30	0							361	4
	199	2							201	1
	20	1							148	6
	74	0							405	7
	129	0							261	4
	164	0							635	6
	32	1	2063	4	0.193892				85	0
	180	2							562	9
	29	1							319	7
	20	0							20	0
	8	0							159	3
	240	1							242	0
	151	0							103	0
	305	0							414	5
	231	2							101	0
	1246	2							127	0
	180	0							110	0
	41	1							95	1
	72	0							119	0
	51	0	2763	9	0.325733				35	1
	810	2							23	0	4579	54	1.1793
	124	1							180	2
	344	0							178	2
	53	0							220	0
	7	0							79	3
	9	0							57	0
	159	0							59	1
	67	1							368	1
	235	0	1812	4	0.220751				191	7
									17	0
									192	0
									62	0
									47	0
									101	0
									25	0
									14	0
									39	0	1845	16	0.867209
									305	0
									270	2
									1226	13
									417	9
									96	0
									172	0
									762	7
									350	3
									68	1
									64	0
									19	0
									160	1
									98	0
									221	0
									125	2
									14	0
									284	0	4689	38	0.810407
									291	1
									472	7
									158	0
									501	4
									324	6
									38	3
									370	4
									53	0
									717	9
									186	2
									424	2
									177	1
									35	1
									212	2
									209	0
									129	3
									45	0	4386	45	1.02599
