# Supplementary material for: Coordination between ECM and cell-cell adhesion regulates the development of islet aggregation, architecture, and functional maturation
Source: eLife. 2023 Aug 23;12:e90006. doi: 10.7554/eLife.90006 (PMC10482429; doi:10.7554/eLife.90006)
Supplement: Figure 5—source data 1. [file elife-90006-fig5-data1.xlsx]

## Sheet: Fig 5I
Localization of alpha cells in Ctnna1 (∆𝛃/∆𝛃) islets
Control (n= 3)	Periphery	Core	Total	% Periphery	% Core		Mutant (n= 3)	Periphery	Core	Total	% Periphery	% Core
	12	2	14	85.7143	14.2857			8	4	12	66.6667	33.3333
	14	2	16	87.5	12.5			39	18	57	68.4211	31.5789
	14	3	17	82.3529	17.6471			13	12	25	52	48
	23	24	47	48.9362	51.0638			34	43	77	44.1558	55.8442
	32	0	32	100	0			26	11	37	70.2703	29.7297
	16	2	18	88.8889	11.1111			34	31	65	52.3077	47.6923
	18	8	26	69.2308	30.7692			20	4	24	83.3333	16.6667
	18	4	22	81.8182	18.1818			42	28	70	60	40
	21	1	22	95.4545	4.54545			11	18	29	37.931	62.069
	21	1	22	95.4545	4.54545			25	18	43	58.1395	41.8605
	29	12	41	70.7317	29.2683			38	32	70	54.2857	45.7143
	18	8	26	69.2308	30.7692			12	8	20	60	40
	90	140	230	39.1304	60.8696			18	11	29	62.069	37.931
	6	6	12	50	50			14	11	25	56	44
	7	7	14	50	50			13	7	20	65	35
	10	16	26	38.4615	61.5385			15	9	24	62.5	37.5
	11	4	15	73.3333	26.6667			10	3	13	76.9231	23.0769
	31	3	34	91.1765	8.82353			14	3	17	82.3529	17.6471
	30	7	37	81.0811	18.9189			52	36	88	59.0909	40.9091
	48	14	62	77.4194	22.5806			21	14	35	60	40
	39	19	58	67.2414	32.7586			17	3	20	85	15
	34	14	48	70.8333	29.1667			13	2	15	86.6667	13.3333
	42	16	58	72.4138	27.5862			21	14	35	60	40
	30	12	42	71.4286	28.5714			12	5	17	70.5882	29.4118
	23	2	25	92	8			33	11	44	75	25
	14	4	18	77.7778	22.2222			15	9	24	62.5	37.5
	21	16	37	56.7568	43.2432			28	15	43	65.1163	34.8837
	21	0	21	100	0			15	13	28	53.5714	46.4286
	13	1	14	92.8571	7.14286			17	5	22	77.2727	22.7273
	12	3	15	80	20			30	31	61	49.1803	50.8197
	13	4	17	76.4706	23.5294			20	5	25	80	20
	17	2	19	89.4737	10.5263			37	23	60	61.6667	38.3333
	15	3	18	83.3333	16.6667			10	9	19	52.6316	47.3684
	16	3	19	84.2105	15.7895			68	76	144	47.2222	52.7778
	28	8	36	77.7778	22.2222			14	11	25	56	44
	47	33	80	58.75	41.25			44	35	79	55.6962	44.3038
	10	1	11	90.9091	9.09091			18	3	21	85.7143	14.2857
	29	16	45	64.4444	35.5556			44	34	78	56.4103	43.5897
	35	3	38	92.1053	7.89474			31	21	52	59.6154	40.3846
	67	12	79	84.8101	15.1899			37	16	53	69.8113	30.1887
	11	1	12	91.6667	8.33333			9	5	14	64.2857	35.7143
	13	4	17	76.4706	23.5294			14	5	19	73.6842	26.3158
	18	3	21	85.7143	14.2857
	23	12	35	65.7143	34.2857
	12	0	12	100	0
	29	3	32	90.625	9.375
	28	14	42	66.6667	33.3333
