# Supplementary material for: Coordination between ECM and cell-cell adhesion regulates the development of islet aggregation, architecture, and functional maturation
Source: eLife. 2023 Aug 23;12:e90006. doi: 10.7554/eLife.90006 (PMC10482429; doi:10.7554/eLife.90006)
Supplement: Figure 5—source data 2. [file elife-90006-fig5-data2.xlsx]

## Sheet: Fig 5J
Localization of alpha cells in Ctnna1 (∆𝛼/∆𝛼) islets
Control (n= 3)	Periphery	Core	Total	% Periphery	% Core		Mutant (n= 3)	Periphery	Core	Total	% Periphery	% Core
	27	3	30	90	10			12	7	19	63.1579	36.8421
	17	4	21	80.9524	19.0476			71	39	110	64.5455	35.4545
	16	1	17	94.1176	5.88235			35	24	59	59.322	40.678
	40	8	48	83.3333	16.6667			34	13	47	72.3404	27.6596
	25	5	30	83.3333	16.6667			60	22	82	73.1707	26.8293
	35	8	43	81.3953	18.6047			48	10	58	82.7586	17.2414
	51	17	68	75	25			35	3	38	92.1053	7.89474
	40	16	56	71.4286	28.5714			9	6	15	60	40
	18	4	22	81.8182	18.1818			13	2	15	86.6667	13.3333
	12	6	18	66.6667	33.3333			15	6	21	71.4286	28.5714
	62	22	84	73.8095	26.1905			21	13	34	61.7647	38.2353
	48	18	66	72.7273	27.2727			27	7	34	79.4118	20.5882
	104	44	148	70.2703	29.7297			17	5	22	77.2727	22.7273
	54	24	78	69.2308	30.7692			13	0	13	100	0
	39	16	55	70.9091	29.0909			71	29	100	71	29
	34	10	44	77.2727	22.7273			17	0	17	100	0
	39	31	70	55.7143	44.2857			29	17	46	63.0435	36.9565
	31	5	36	86.1111	13.8889			41	27	68	60.2941	39.7059
	20	2	22	90.9091	9.09091			37	13	50	74	26
	22	7	29	75.8621	24.1379			16	6	22	72.7273	27.2727
	24	4	28	85.7143	14.2857			49	34	83	59.0361	40.9639
	37	22	59	62.7119	37.2881			33	5	38	86.8421	13.1579
	16	3	19	84.2105	15.7895			53	9	62	85.4839	14.5161
	11	1	12	91.6667	8.33333			37	17	54	68.5185	31.4815
	28	8	36	77.7778	22.2222			82	41	123	66.6667	33.3333
	37	12	49	75.5102	24.4898			31	22	53	58.4906	41.5094
	24	1	25	96	4			45	10	55	81.8182	18.1818
	52	14	66	78.7879	21.2121			99	59	158	62.6582	37.3418
	13	1	14	92.8571	7.14286			22	6	28	78.5714	21.4286
	13	4	17	76.4706	23.5294			51	15	66	77.2727	22.7273
	11	12	23	47.8261	52.1739			42	10	52	80.7692	19.2308
	9	1	10	90	10			25	4	29	86.2069	13.7931
	32	14	46	69.5652	30.4348			49	16	65	75.3846	24.6154
	12	2	14	85.7143	14.2857			22	6	28	78.5714	21.4286
	30	5	35	85.7143	14.2857			53	37	90	58.8889	41.1111
	8	5	13	61.5385	38.4615			52	24	76	68.4211	31.5789
	18	4	22	81.8182	18.1818			25	9	34	73.5294	26.4706
	10	2	12	83.3333	16.6667			20	7	27	74.0741	25.9259
	14	0	14	100	0			25	13	38	65.7895	34.2105
	17	1	18	94.4444	5.55556			17	8	25	68	32
	13	1	14	92.8571	7.14286			25	9	34	73.5294	26.4706
	12	0	12	100	0			45	4	49	91.8367	8.16327
	14	0	14	100	0			32	16	48	66.6667	33.3333
	16	2	18	88.8889	11.1111			38	18	56	67.8571	32.1429
	24	3	27	88.8889	11.1111			45	18	63	71.4286	28.5714
	32	5	37	86.4865	13.5135			49	2	51	96.0784	3.92157
	26	6	32	81.25	18.75			13	3	16	81.25	18.75
	23	5	28	82.1429	17.8571			21	4	25	84	16
	55	35	90	61.1111	38.8889			19	3	22	86.3636	13.6364
	11	0	11	100	0			56	11	67	83.5821	16.4179
	27	8	35	77.1429	22.8571			11	1	12	91.6667	8.33333
	12	5	17	70.5882	29.4118			25	2	27	92.5926	7.40741
	15	7	22	68.1818	31.8182			12	4	16	75	25
	26	8	34	76.4706	23.5294			13	6	19	68.4211	31.5789
	13	5	18	72.2222	27.7778			42	33	75	56	44
	20	0	20	100	0			24	20	44	54.5455	45.4545
	24	6	30	80	20			15	7	22	68.1818	31.8182
	12	11	23	52.1739	47.8261			13	8	21	61.9048	38.0952
	17	0	17	100	0			42	34	76	55.2632	44.7368
	30	7	37	81.0811	18.9189			43	25	68	63.2353	36.7647
	28	9	37	75.6757	24.3243			16	3	19	84.2105	15.7895
	21	7	28	75	25			27	2	29	93.1034	6.89655
								54	23	77	70.1299	29.8701
								34	29	63	53.9683	46.0317
								22	10	32	68.75	31.25
								92	62	154	59.7403	40.2597
								41	29	70	58.5714	41.4286
								70	43	113	61.9469	38.0531
								49	27	76	64.4737	35.5263
								54	14	68	79.4118	20.5882
								14	2	16	87.5	12.5
								14	15	29	48.2759	51.7241
								22	6	28	78.5714	21.4286
								32	14	46	69.5652	30.4348
								35	19	54	64.8148	35.1852
								24	11	35	68.5714	31.4286
								26	13	39	66.6667	33.3333
								36	11	47	76.5957	23.4043
								25	12	37	67.5676	32.4324
								22	9	31	70.9677	29.0323
								25	3	28	89.2857	10.7143
								29	10	39	74.359	25.641
								13	5	18	72.2222	27.7778
								9	8	17	52.9412	47.0588
								30	6	36	83.3333	16.6667
								10	3	13	76.9231	23.0769
								10	0	10	100	0
								20	6	26	76.9231	23.0769
