# Supplementary material for: Coordination between ECM and cell-cell adhesion regulates the development of islet aggregation, architecture, and functional maturation
Source: eLife. 2023 Aug 23;12:e90006. doi: 10.7554/eLife.90006 (PMC10482429; doi:10.7554/eLife.90006)
Supplement: Figure 7—source data 1. [file elife-90006-fig7-data1.xlsx]

## Sheet: Fig 7I
IPGTT 8 weeks
Control (n= 10)							DKO (n= 10)
	T0 min	T15 min	T30 min	T60 min	T120 min			T0 min	T15 min	T30 min	T60 min	T120 min
	(mg/dL)	(mg/dL)	(mg/dL)	(mg/dL)	(mg/dL)			(mg/dL)	(mg/dL)	(mg/dL)	(mg/dL)	(mg/dL)
1	88	424	486	275	166		1	147	432	453	572	481
2	75	229	343	230	130		2	244	750	750	750	628
3	114	575	496	469	255		3	115	383	483	435	333
4	77	251	321	305	114		4	107	479	564	454	189
5	84	414	491	311	169		5	175	511	616	598	485
6	53	221	373	346	139		6	81	307	388	356	229
7	100	210	285	268	107		7	139	427	418	399	129
8	69	244	329	263	163		8	72	347	563	395	160
9	67	296	308	241	128		9	106	319	574	374	231
10	58	159	177	128	101		10	91	344	418	365	264
	78.5	302.3	360.9	283.6	147.2			127.7	429.9	522.7	469.8	312.9
	18.7098	128.565	103.432	87.6333	45.0723			51.5904	131.368	111.969	129.345	165.414
