# Supplementary material for: Coordination between ECM and cell-cell adhesion regulates the development of islet aggregation, architecture, and functional maturation
Source: eLife. 2023 Aug 23;12:e90006. doi: 10.7554/eLife.90006 (PMC10482429; doi:10.7554/eLife.90006)
Supplement: Figure 7—source data 2. [file elife-90006-fig7-data2.xlsx]

## Sheet: Fig 7J
GSIS in vivo 20 - 38 weeks old
Control (n= 5)	Insulin (ug/L)					DKO (n= 4)	Insulin (ug/L)
	T0	T15	T15-T0				T0	T15	T15-T0
1	0.064	0.191	0.127			1	0.0429836	0.245505	0.202521
2	0.071	0.311	0.24			2	0.248165	0.209215	-0.0389493
3	0.244	0.424	0.18			3	0.713911	0.623043	-0.0908679
4	0.141	0.669	0.528			4	0.0822745	0.0403659	-0.0419086
5	0.0721	0.107	0.0349				0.271834	0.279532	0.00769881
	0.11842	0.3404	0.22198				0.307841	0.245834	0.132046
	0.0768699	0.219447	0.186919
